# Supplementary material for: Ethyl acetate as an acetyl source and solvent for acetylation of alcohols by KOH
Source: Royal Society of Chemistry journal article supplement (doi:10.1039/d3ra08717d), 2024-01-01
Supplement: d3ra08717d1.pdf [file d3ra08717d1.pdf]

# Supporting Information

## I. General experimental details

### 1.1. Materials

All of the materials were purchased from Beijing Innochem Company, and used as received.

### 1.2 Characterization

Some products were purified by flash chromatography on silica gel. Benzyl acetate, cyclohexylmethyl acetate, naphthalen-2-yl benzoate, 1-phenylethyl acetate: analysis of crude reaction mixture was performed on a SHIMADZU 2030 GC System with a HPINNOWAX capillary column (30 m×0.25 mm×0.32 μm) and a FID detector. The following GC temperature program was used: 45 °C is maintained for 2 minutes, rises to 280 °C at 15 °C/min, and hold for 5 minutes. Nitrogen was used as a carrier gas. The injector temperature was held at 250 °C. <sup>1</sup>H-NMR and <sup>13</sup>C-NMR spectra were acquired on a 400 MHz JNM-ECZ400S/L1 instrument. Chemical shifts were reported in ppm relative to a peak of a residual protiated solvent (CDCl<sub>3</sub> or DMSO). General procedure for identifying compounds by HRMS(LC-MS): (1) Chromatographic conditions: The product was analyzed on Agilent 6545 Q-TOF LC-MS using 1290 Infinity II liquid chromatography system, column type: Agilent ZORBAX SB-C18 (2.1x50mm). In the -ESI mode, the mobile phase is 60% acetonitrile-40% water; in the + ESI mode, the mobile phase is 60% acetonitrile-40% water (0.1% formic acid). (2) Mass spectrometry conditions: Agilent Jet Stream Technical conditions: The sheath gas temperature is set at 400 °C, the sheath liquid is set at 12 L/min, measured in -ESI or +ESI modes, and the scan range is from 100 to 400 (m/z). General procedure for identifying compounds by GC-MS: (1) Chromatographic conditions: The products were analyzed on an Agilent 7890 B-7000 C GC-MS, using an HP-5MS chromatographic column (30 m×0.25 mm 0.25 μm) and a FID detector. Use the following GC temperature procedure: 50 °C for 3 min, rise to 100 °C at 10 °C/min, then to 280 °C at a warming rate of 20 °C/min and hold for 10 min. Nitrogen gas was used as a carrier gas. The injector temperature was kept at 250 °C. (2) Mass spectrometry conditions: the interface temperature is set at 250 °C, ionized by EI mode (70 eV), the ion source temperature is set at 230 °C, and the MS quadrupole temperature is set at 150 °C. Desay in full scan mode with a scan range of 40 to 500 (m/z).

### 1.3 General procedures for typical procedure

Typical procedure: For KOH used as the catalyst, desired amounts of primary alcohols substrate (0.5 mmol), KOH (0.75 mmol primary alcohol and 1.25 mmol secondary alcohol), EtOAc (3 mL) were added into a 10 mL reaction tube (open air), and complete the reaction at room temperature a set time (primary alcohol reaction for 10 min; secondary alcohol reaction for 60 min). After cooling to room temperature, the reaction was acidificated with 2 mol/L HCl (2 mL), the solution was extracted by ethyl acetate ( $3 \times 2$  mL). Products were got from purification by column chromatography on 200-300 mesh silica gel using ethyl acetate/petroleum ether as eluent to afford the desired product. Some products was as following: the combined substrate was subjected to GC/FID for qualitative with dodecane as internal standard and for quantitative identification standard substrate.

## II. Optimization of reaction conditions of 1-phenylethanol

Table S1: Optimization of Reaction Conditions

| 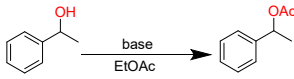 |       |         |        |          |
|-----------------------------------------------------------------------------------|-------|---------|--------|----------|
| Entry                                                                             | T/min | Temp/°C | Equiv. | Yield(%) |
| 1                                                                                 | 10    | 25°C    | 1.5    | 14       |
| 2                                                                                 | 10    | 25°C    | 2      | 37       |
| 3                                                                                 | 10    | 25°C    | 2.5    | 44       |
| 4                                                                                 | 10    | 25°C    | 3      | 46       |
| 5                                                                                 | 30    | 25°C    | 2.5    | 46       |
| 6                                                                                 | 60    | 25°C    | 2.5    | 52       |
| 7                                                                                 | 120   | 25°C    | 2.5    | 54       |
| 8                                                                                 | 60    | 35°C    | 2.5    | 56       |
| 9                                                                                 | 60    | 45°C    | 2.5    | 39       |
| 10                                                                                | 60    | 55°C    | 2.5    | 37       |

Condition: substrate (0.5 mmol), KOH, EtOAc (3 mL), GC yield.

### III. phenols, acylation was acetylated

Table S2: phenols, acylation was acetylated

| Entry                                                                                                        | Substrate                                                                         | Product /Yield                                                                           |
|--------------------------------------------------------------------------------------------------------------|-----------------------------------------------------------------------------------|------------------------------------------------------------------------------------------|
| 1                                                                                                            | 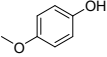 | <br>0% |
| 2                                                                                                            |  | <br>0% |
| 3                                                                                                            |  | <br>0% |
| Condition: [a] substrate (0.5 mmol), KOH (0.75 mmol),<br>EtOAc (3 mL), RT, 10 min, open air, isolated yield. |                                                                                   |                                                                                          |

#### IV. Data of $^1\text{H}$ NMR and $^{13}\text{C}$ NMR of products

**3-methoxyphenyl acetate(table 3-1)<sup>1</sup>:** yellow liquid, yield: 90%.  $^1\text{H}$  NMR (400 MHz,  $\text{CD}_3\text{Cl}$ )  $\delta$  7.32 – 7.25 (m, 1H), 6.97 – 6.92 (m, 1H), 6.91 – 6.89 (m, 1H), 6.88 – 6.85 (m, 1H), 5.08 (s, 2H), 3.81 (s, 2H), 2.11 (s, 3H).  $^{13}\text{C}$  NMR (100 MHz,  $\text{CD}_3\text{Cl}$ )  $\delta$  171.00, 159.85, 137.54, 129.75, 120.52, 113.84, 113.79, 77.48, 77.16, 76.84, 66.28, 55.35, 21.12. HRMS:  $[\text{C}_{10}\text{H}_{12}\text{O}_3]$  calculated 180.0786; measured 180.0783; found  $([\text{C}_{10}\text{H}_{12}\text{O}_3]-\text{H})^-$  : 179.0715.

**2-methoxyphenyl acetate(table 3-2)<sup>1</sup>:** colorless liquid, yield: 92%.  $^1\text{H}$  NMR(400 MHz, $\text{CD}_3\text{Cl}$ )  $\delta$  7.35 – 7.27 (m, 2H), 6.99 – 6.86 (m, 2H), 5.17 (s, 2H), 3.87 – 3.82 (m, 3H), 2.11 (s, 3H).  $^{13}\text{C}$  NMR (100 MHz,  $\text{CD}_3\text{Cl}$ )  $\delta$  172.65, 133.95, 130.33, 129.41, 128.60. HRMS:  $[\text{C}_{10}\text{H}_{12}\text{O}_3]$  calculated 180.0786; measured 180.0793; found  $([\text{C}_{10}\text{H}_{12}\text{O}_3]+\text{Na})^+$  : 203.0685.

**4-methoxyphenyl acetate(table 3-3)<sup>1</sup>:** colorless liquid, yield: 99%.  $^1\text{H}$  NMR (400 MHz,  $\text{CD}_3\text{Cl}$ )  $\delta$  7.30 (d,  $J = 8.6$  Hz, 2H), 6.89 (d,  $J = 8.6$  Hz, 2H), 5.04 (s, 2H), 3.81 (s, 3H), 2.08 (s, 3H).  $^{13}\text{C}$  NMR (100 MHz,  $\text{CD}_3\text{Cl}$ )  $\delta$  171.14, 159.78, 130.27, 128.18, 114.08, 77.48, 77.16, 76.84, 66.26, 55.41, 21.21. HRMS:  $[\text{C}_{10}\text{H}_{12}\text{O}_3]$  calculated 180.0786; measured 180.0786; found  $([\text{C}_{10}\text{H}_{12}\text{O}_3]+\text{Na})^+$  : 203.0677.

**naphthalen-2-ylmethyl acetate(table 3-4)<sup>1</sup>:** white solid, yield: 92%.  $^1\text{H}$  NMR (400 MHz,  $\text{CD}_3\text{Cl}$ )  $\delta$  7.69 – 7.60 (m, 5H), 7.33 – 7.25 (m, 3H), 5.08 (s, 2H), 1.95 (s, 3H).  $^{13}\text{C}$  NMR (100 MHz,  $\text{CD}_3\text{Cl}$ )  $\delta$  171.08, 133.45, 133.31, 133.23, 128.51, 128.10, 127.83, 127.50, 126.44, 126.40, 126.03, 77.48, 77.16, 76.84, 66.57, 21.17. HRMS:  $[\text{C}_{13}\text{H}_{12}\text{O}_2]$  calculated 200.0837; measured 200.0832; found  $([\text{C}_{13}\text{H}_{12}\text{O}_2]+\text{Na})^+$  : 223.0722.

**naphthalen-1-ylmethyl acetate(table 3-5)<sup>1</sup>:** colorless liquid, yield: 90%.  $^1\text{H}$  NMR (400 MHz,  $\text{CD}_3\text{Cl}$ )  $\delta$  8.06 – 8.00 (m, 1H), 7.93 – 7.84 (m, 1H), 7.63 – 7.42 (m, 5H), 5.59 (s, 2H), 2.12 (s, 3H).  $^{13}\text{C}$  NMR (100 MHz,  $\text{CD}_3\text{Cl}$ )  $\delta$  171.12, 133.84, 131.53, 129.43, 128.84, 127.63, 126.70, 126.08, 125.40, 123.65, 77.48, 77.16, 76.84, 64.70, 21.14. HRMS:  $[\text{C}_{13}\text{H}_{12}\text{O}_2]$  calculated 200.0837; measured 200.0828; found  $([\text{C}_{13}\text{H}_{12}\text{O}_2]+\text{Na})^+$  : 223.0716.

**2-methylbenzyl acetate(table 2-6)<sup>8</sup>:** colorless liquid, yield: 93%.  $^1\text{H}$  NMR (400 MHz,  $\text{CD}_3\text{Cl}$ )  $\delta$  7.37 – 7.16 (m, 5H), 5.13 (s, 2H), 2.36 (s, 3H), 2.11 (s, 3H).  $^{13}\text{C}$  NMR (100 MHz,  $\text{CD}_3\text{Cl}$ )  $\delta$  171.10, 137.12, 133.96, 130.51, 129.37, 128.68, 126.16, 77.48, 77.16, 76.84, 64.85, 21.08, 19.00.. HRMS:  $[\text{C}_{10}\text{H}_{12}\text{O}_2]$  calculated 164.0837; measured 164.0833; found  $([\text{C}_{10}\text{H}_{12}\text{O}_2]+\text{H})^+$  : 165.0903.

**4-methylbenzyl acetate(table 3-7)<sup>2</sup>:** colorless liquid, yield: 96%. <sup>1</sup>H NMR (400 MHz, CD<sub>3</sub>Cl) δ 7.26 (d, *J* = 8.1 Hz, 2H), 7.18 (d, *J* = 7.8 Hz, 2H), 5.07 (s, 2H), 2.36 (s, 3H), 2.09 (s, 3H).<sup>13</sup>C NMR (100 MHz, CD<sub>3</sub>Cl) δ 171.10, 138.26, 133.03, 129.38, 128.58, 77.48, 77.16, 76.84, 66.40, 21.32, 21.18. HRMS: [C<sub>10</sub>H<sub>12</sub>O<sub>2</sub>] calculated 164.0837; measured 164.0835; found ([C<sub>10</sub>H<sub>12</sub>O<sub>2</sub>]+H)<sup>+</sup>: 165.0907.

**4-bromobenzyl acetate(table 3-8)<sup>5</sup>:** colorless liquid, yield: 96%. <sup>1</sup>H NMR (400 MHz, CD<sub>3</sub>Cl) δ 7.49 (d, *J* = 8.4 Hz, 2H), 7.23 (d, *J* = 8.3 Hz, 2H), 5.05 (s, 2H), 2.10 (s, 3H).<sup>13</sup>C NMR (100 MHz, CD<sub>3</sub>Cl) δ 170.91, 135.07, 131.85, 130.07, 122.42, 77.48, 77.16, 76.84, 65.61, 21.09. GC - MS (EI): [C<sub>9</sub>H<sub>9</sub>BrO<sub>2</sub>] calculated 227.98; measured 228.1; found m/z: 228.1, 230.1, 188.1, 186.1, 171.1, 169.1, 107.2, 89.3, 77.2, 63.3, 43.3.

**4-fluorobenzyl acetate(table 3-9)<sup>10</sup>:** colorless liquid, yield: 90%. <sup>1</sup>H NMR (400 MHz, CD<sub>3</sub>Cl) δ 7.38 – 7.29 (m, 2H), 7.09 – 6.98 (m, 2H), 5.06 (s, 2H), 2.09 (s, 3H).<sup>13</sup>C NMR (100 MHz, CD<sub>3</sub>Cl) δ 170.99, 162.78 (d, *J* = 246.8 Hz), 131.93, 130.41 (d, *J* = 8.3 Hz), 115.62 (d, *J* = 21.6 Hz), 77.48, 77.16, 76.84, 65.71, 21.12.<sup>19</sup>F NMR (376 MHz, CD<sub>3</sub>Cl) δ -113.56. HRMS: [C<sub>9</sub>H<sub>9</sub>FO<sub>2</sub>] calculated 168.0587; measured 168.0572; found ([C<sub>9</sub>H<sub>9</sub>FO<sub>2</sub>]+HCOO): 213.0553.

**4-chlorobenzyl acetate(table 3-10)<sup>1</sup>:** colorless liquid, yield: 93%. <sup>1</sup>H NMR (400 MHz, CD<sub>3</sub>Cl) δ 7.33 (d, *J* = 8.8 Hz, 2H), 7.29 (d, *J* = 8.7 Hz, 2H), 5.06 (s, 2H), 2.10 (s, 3H).<sup>13</sup>C NMR (100 MHz, CD<sub>3</sub>Cl) δ 170.91, 134.56, 134.27, 129.77, 128.88, 77.48, 77.16, 76.84, 65.58, 21.09. GC - MS (EI): [C<sub>9</sub>H<sub>9</sub>ClO<sub>2</sub>] calculated 184.62; measured 184.4; found m/z: 184.4, 142.4, 125.3, 107.4, 89.4, 77.3, 63.3, 43.4.

**4-iodobenzyl acetate(table 3-11)<sup>9</sup>:** white solid, yield: 94%. <sup>1</sup>H NMR (400 MHz, CD<sub>3</sub>Cl) δ 7.69 (d, *J* = 8.4 Hz, 2H), 7.10 (d, *J* = 8.5 Hz, 2H), 5.04 (s, 2H), 2.10 (s, 3H).<sup>13</sup>C NMR (100 MHz, CD<sub>3</sub>Cl) δ 170.89, 137.82, 135.73, 130.23, 94.07, 77.48, 77.16, 76.84, 65.70, 21.09. GC - MS (EI): [C<sub>9</sub>H<sub>9</sub>IO<sub>2</sub>] calculated 276.07; measured 276.4; found m/z: 276.4, 234.3, 217.3, 107.3, 89.3, 78.3, 63.3, 43.4.

**2-bromobenzyl acetate(table 3-12)<sup>1</sup>:** colorless liquid, yield: 87%. <sup>1</sup>H NMR (400 MHz, CD<sub>3</sub>Cl) δ 7.58 (dd, *J* = 7.9, 1.3 Hz, 1H), 7.41 (dd, *J* = 7.7, 1.8 Hz, 1H), 7.32 (td, *J* = 7.5, 1.3 Hz, 1H), 7.19 (td, *J* = 7.7, 1.8 Hz, 1H), 5.19 (s, 2H), 2.14 (s, 3H).<sup>13</sup>C NMR (100 MHz, CD<sub>3</sub>Cl) δ 170.80, 135.37, 132.99, 129.99, 129.85, 127.63, 123.58, 77.48, 77.16, 76.84, 65.97, 21.01. GC - MS (EI):

[C<sub>9</sub>H<sub>9</sub>BrO<sub>2</sub>] calculated 227.98; measured 228.2; found m/z: 228.2, 171.3, 149.4, 107.4, 89.3, 77.3, 63.3, 43.4.

**4-(trifluoromethyl)benzyl acetate(table 3-13)<sup>11</sup>:** colorless liquid, yield: 87%. <sup>1</sup>H NMR (400 MHz, CD<sub>3</sub>Cl) δ 7.62 (d, *J* = 8.1 Hz, 2H), 7.47 (d, *J* = 8.0 Hz, 2H), 5.16 (s, 2H), 2.13 (s, 3H). <sup>13</sup>C NMR (100 MHz, CD<sub>3</sub>Cl) δ 170.84, 140.05, 130.51 (d, *J* = 32.6 Hz), 128.31, 125.67 (q, *J* = 3.8 Hz), 124.14 (d, *J* = 272.0 Hz), 77.48, 77.16, 76.84, 65.44, 21.02. <sup>19</sup>F NMR (376 MHz, CD<sub>3</sub>Cl) δ -62.57. HRMS: [C<sub>10</sub>H<sub>9</sub>F<sub>3</sub>O<sub>2</sub>] calculated 218.0534; measured 218.0555; found ([C<sub>10</sub>H<sub>9</sub>F<sub>3</sub>O<sub>2</sub>]-H)<sup>-</sup> : 217.0458.

**4-nitrobenzyl acetate(table 3-14)<sup>2</sup>:** white solid, yield: 83%, <sup>1</sup>H NMR (400 MHz, CD<sub>3</sub>Cl) δ 8.22 (d, *J* = 8.8 Hz, 2H), 7.51 (d, *J* = 8.9 Hz, 1H), 5.19 (s, 2H), 2.15 (s, 3H). <sup>13</sup>C NMR (100 MHz, CD<sub>3</sub>Cl) δ 170.66, 147.81, 143.34, 128.50, 123.91, 77.48, 77.16, 76.84, 64.88, 20.95. HRMS: [C<sub>9</sub>H<sub>9</sub>NO<sub>4</sub>] calculated 195.0542; measured 195.0532; found ([C<sub>9</sub>H<sub>9</sub>NO<sub>4</sub>]+Na)<sup>+</sup> : 218.0433.

**4-cyanobenzyl acetate(table 3-15)<sup>2</sup>:** white solid, yield: 84%. <sup>1</sup>H NMR (400 MHz, CD<sub>3</sub>Cl) δ 7.65 (d, *J* = 8.4 Hz, 2H), 7.45 (d, *J* = 8.2 Hz, 2H), 5.15 (s, 2H), 2.13 (s, 3H). <sup>13</sup>C NMR (100 MHz, CD<sub>3</sub>Cl) δ 170.68, 141.36, 132.50, 128.43, 118.68, 112.11, 77.48, 77.16, 76.84, 65.17, 20.96. HRMS: [C<sub>10</sub>H<sub>9</sub>NO<sub>2</sub>] calculated 175.0633; measured 175.0628; found ([C<sub>10</sub>H<sub>9</sub>NO<sub>2</sub>]+H)<sup>+</sup> : 176.0704.

**4-ethynylbenzyl acetate(table 3-16)<sup>12</sup>:** white solid, yield: 91%. <sup>1</sup>H NMR (400 MHz, CD<sub>3</sub>Cl) δ 7.48 (d, *J* = 8.2 Hz, 2H), 7.31 (d, *J* = 8.4 Hz, 2H), 5.09 (s, 2H), 3.09 (s, 1H), 2.11 (s, 3H). <sup>13</sup>C NMR (100 MHz, CD<sub>3</sub>Cl) δ 170.92, 136.76, 132.43, 128.15, 122.13, 83.36, 77.75, 77.48, 77.16, 76.84, 65.85, 21.09. HRMS: [C<sub>11</sub>H<sub>10</sub>O<sub>2</sub>] calculated 174.0681; measured 174.0681; found ([C<sub>11</sub>H<sub>10</sub>O<sub>2</sub>]+H)<sup>+</sup> : 175.0751.

**phenethyl acetate(table 3-17)<sup>1</sup>:** colorless liquid, yield: 80%. <sup>1</sup>H NMR (400 MHz, CD<sub>3</sub>Cl) δ 7.32 – 7.28 (m, 2H), 7.26 – 7.24 (m, 1H), 7.24 – 7.20 (m, 2H), 4.28 (t, *J* = 7.1 Hz, 2H), 2.94 (t, *J* = 7.1 Hz, 2H), 2.04 (s, 3H). <sup>13</sup>C NMR (100 MHz, CD<sub>3</sub>Cl) δ 171.22, 137.95, 129.03, 128.64, 126.70, 77.48, 77.16, 76.84, 65.08, 35.21, 21.12. HRMS: [C<sub>10</sub>H<sub>12</sub>O<sub>2</sub>] calculated 164.0837; measured 164.083; found ([C<sub>10</sub>H<sub>12</sub>O<sub>2</sub>]+H)<sup>+</sup> : 165.0908.

**4-methoxyphenethyl acetate(table 3-18)<sup>13</sup>:** colorless liquid, yield: 85%. <sup>1</sup>H NMR(400 MHz, CD<sub>3</sub>Cl) δ 7.13 (d, *J* = 8.6 Hz, 2H), 6.85 (d, *J* = 8.6 Hz, 2H), 4.24 (t, *J* = 7.1 Hz, 2H), 3.79 (s, 3H), 2.87 (t, *J* = 7.1 Hz, 2H), 2.04 (s, 3H). <sup>13</sup>C NMR (100 MHz, CD<sub>3</sub>Cl) δ 171.24, 158.42, 129.98,

129.94, 114.03, 77.48, 77.16, 76.84, 65.32, 55.37, 34.31, 21.12.. HRMS: [C<sub>11</sub>H<sub>14</sub>O<sub>3</sub>] calculated 194.0943; measured 194.0941; found ([C<sub>11</sub>H<sub>14</sub>O<sub>3</sub>]+Na)<sup>+</sup> : 217.0834.

**3-phenylpropyl acetate(table 3-19)<sup>1</sup>**: colorless liquid, yield: 83%. <sup>1</sup>H NMR (400 MHz, CD<sub>3</sub>Cl) δ 7.32 – 7.27 (m, 2H), 7.22 – 7.19 (m, 2H), 7.18 (d, *J* = 1.7 Hz, 1H), 4.09 (t, *J* = 6.6 Hz, 2H), 2.72 – 2.67 (m, 2H), 2.06 (s, 3H), 2.00 – 1.92 (m, 2H).<sup>13</sup>C NMR (100 MHz, CD<sub>3</sub>Cl) δ 171.32, 141.33, 128.57, 128.52, 126.13, 77.48, 77.16, 76.84, 63.96, 32.29, 30.29, 21.10.. HRMS: [C<sub>11</sub>H<sub>14</sub>O<sub>2</sub>] calculated 178.0994; measured 178.0992; measured 194.0941; found ([C<sub>11</sub>H<sub>14</sub>O<sub>2</sub>]+H)<sup>+</sup> : 179.1065.

**4-phenylbutyl acetate(table 3-20)<sup>14</sup>**: colorless liquid, yield: 86%. <sup>1</sup>H NMR (400 MHz, CD<sub>3</sub>Cl) δ 7.32 – 7.26 (m, 2H), 7.22 – 7.18 (m, 2H), 7.19 – 7.15 (m, 1H), 4.09 (t, *J* = 6.0 Hz, 2H), 2.65 (t, *J* = 7.0 Hz, 2H), 2.05 (s, 3H), 1.73 – 1.63 (m, 4H).<sup>13</sup>C NMR (100 MHz, CD<sub>3</sub>Cl) δ 171.36, 142.16, 128.52, 128.48, 125.97, 77.48, 77.16, 76.84, 64.49, 35.58, 28.31, 27.85, 21.13.. HRMS: [C<sub>12</sub>H<sub>16</sub>O<sub>2</sub>] calculated 192.115; measured 192.1142; found ([C<sub>12</sub>H<sub>16</sub>O<sub>2</sub>]+HCOO)<sup>-</sup> : 237.1124.

**cyclohexylmethyl acetate(table 3-21)<sup>15</sup>**: colorless liquid, yield: 92%. <sup>1</sup>H NMR (400 MHz, CD<sub>3</sub>Cl) δ 3.87 (d, *J* = 6.6 Hz, 2H), 2.05 (s, 3H), 1.77 – 1.69 (m, 4H), 1.62 – 1.57 (m, 1H), 1.35 – 1.08 (m, 4H), 1.05 – 0.87 (m, 2H).<sup>13</sup>C NMR (100 MHz, CD<sub>3</sub>Cl) δ 171.49, 77.48, 77.16, 76.84, 69.85, 37.17, 29.79, 26.49, 25.80, 21.12.. HRMS: [C<sub>9</sub>H<sub>16</sub>O<sub>2</sub>] calculated 156.115; measured 156.1141; found ([C<sub>9</sub>H<sub>16</sub>O<sub>2</sub>]+CH<sub>3</sub>COO)<sup>-</sup> : 215.1281.

**cinnamyl acetate(table 3-22)<sup>1</sup>**: light yellow liquid, yield: 96%. <sup>1</sup>H NMR (400 MHz, CD<sub>3</sub>Cl) δ 7.41 – 7.37 (m, 2H), 7.35 – 7.29 (m, 2H), 7.28 – 7.23 (m, 1H), 6.65 (dt, *J* = 15.9, 1.4 Hz, 1H), 6.28 (dt, *J* = 15.9, 6.5 Hz, 1H), 4.72 (dd, *J* = 6.4, 1.4 Hz, 2H), 2.10 (s, 3H).<sup>13</sup>C NMR (100 MHz, CD<sub>3</sub>Cl) δ 171.02, 136.31, 134.35, 128.73, 128.21, 126.73, 123.27, 77.48, 77.16, 76.84, 65.22, 21.13.. HRMS: [C<sub>11</sub>H<sub>12</sub>O<sub>2</sub>] calculated 176.0837; measured 176.0834; found ([C<sub>11</sub>H<sub>12</sub>O<sub>2</sub>]+H)<sup>+</sup> : 177.0809.

**farnesyl acetate(table 3-23)<sup>7</sup>**: colorless liquid, yield: 86%. <sup>1</sup>H NMR (400 MHz, CD<sub>3</sub>Cl) δ 5.38 – 5.31 (m, 1H), 5.13 – 5.04 (m, 2H), 4.58 (d, *J* = 7.2 Hz, 2H), 2.15 – 2.05 (m, 6H), 2.05 (s, 3H), 2.03 – 1.94 (m, 2H), 1.70 (s, 3H), 1.69 – 1.67 (m, 3H), 1.60 (s, 6H).<sup>13</sup>C NMR (100 MHz, CD<sub>3</sub>Cl) δ 171.31, 142.45, 135.61, 131.48, 124.44, 123.75, 118.36, 77.48, 77.16, 76.84, 61.54, 39.95, 39.82, 39.65, 26.83, 26.30, 25.83, 21.20, 17.81, 16.60, 16.14. GC - MS (EI): [C<sub>17</sub>H<sub>28</sub>O<sub>2</sub>] calculated 264.41; measured 264.3; found m/z: 264.3, 136.2, 107.2, 93.2, 81.2, 77.3, 69.3, 43.2.



**geranyl acetate(table 3-24)<sup>7</sup>**: colorless liquid, yield: 92%. <sup>1</sup>H NMR (400 MHz, CD<sub>3</sub>Cl) δ 5.34 (tq, *J* = 7.1, 1.3 Hz, 1H), 5.08 (ddq, *J* = 6.9, 5.4, 1.4 Hz, 1H), 4.58 (d, *J* = 7.1 Hz, 2H), 2.13 – 2.05 (m, 3H), 2.05 (s, 3H), 1.70 (s, 3H), 1.68 (s, 3H), 1.60 (s, 3H). <sup>13</sup>C NMR (100 MHz, CD<sub>3</sub>Cl) δ 171.31, 142.45, 135.61, 131.48, 124.44, 123.75, 118.36, 77.48, 77.16, 76.84, 61.54, 39.95, 39.82, 39.65, 26.83, 26.30, 25.83, 21.20, 17.81, 16.60, 16.14. GC - MS (EI): [C<sub>12</sub>H<sub>20</sub>O<sub>2</sub>] calculated 196.29; measured 196.3; found m/z: 196.3, 154.2, 136.3, 121.3 107.2, 93.4, 80.3, 77.2, 69.4, 43.2.

**furan-2-ylmethyl acetate(table 3-27)<sup>1</sup>**: light yellow liquid, yield: 92%. <sup>1</sup>H NMR (400 MHz, CD<sub>3</sub>Cl) δ 7.42 (dd, *J* = 1.9, 0.8 Hz, 1H), 6.40 (dd, *J* = 3.1, 0.8 Hz, 1H), 6.36 (dd, *J* = 3.3, 1.8 Hz, 1H), 5.05 (s, 2H), 2.08 (s, 3H). <sup>13</sup>C NMR (100 MHz, CD<sub>3</sub>Cl) δ 170.80, 149.58, 143.41, 110.75, 110.69, 77.48, 77.16, 76.84, 58.17, 20.98. HRMS: [C<sub>7</sub>H<sub>8</sub>O<sub>3</sub>] calculated 140.0473; measured 140.0471; found ([C<sub>7</sub>H<sub>8</sub>O<sub>3</sub>]+CH<sub>3</sub>COO)<sup>-</sup> : 199.0609.

**thiophen-2-ylmethyl acetate(table 3-28)<sup>1</sup>**: colorless liquid, yield: 95%. <sup>1</sup>H NMR (400 MHz, CD<sub>3</sub>Cl) δ 7.32 (dd, *J* = 5.1, 1.2 Hz, 1H), 7.09 (ddt, *J* = 3.6, 1.3, 0.7 Hz, 1H), 6.99 (dd, *J* = 5.1, 3.5 Hz, 1H), 5.26 (s, 2H), 2.08 (s, 3H). <sup>13</sup>C NMR (100 MHz, CD<sub>3</sub>Cl) δ 170.84, 138.01, 128.34, 126.98, 126.95, 77.48, 77.16, 76.84, 60.58, 21.07. GC - MS (EI): [C<sub>7</sub>H<sub>8</sub>O<sub>2</sub>S] calculated 156.20; measured 156.4; found m/z: 156.4, 114.4, 97.4, 85.3, 43.4.

**1,4-phenylenebis(methylene) diacetate(table 3-29)<sup>16</sup>**: white solid, yield: 62%. <sup>1</sup>H NMR (400 MHz, CD<sub>3</sub>Cl) δ 7.35 (s, 4H), 5.10 (s, 4H), 2.10 (s, 6H). <sup>13</sup>C NMR (100 MHz, CD<sub>3</sub>Cl) δ 170.97, 136.12, 128.58, 77.48, 77.16, 76.84, 66.01, 21.10. HRMS: [C<sub>12</sub>H<sub>14</sub>O<sub>4</sub>] calculated 222.0892; measured 222.0891; found ([C<sub>12</sub>H<sub>14</sub>O<sub>4</sub>]+H)<sup>+</sup> : 245.0783.

**naphthalen-2-ylmethyl formate(table 4-7)<sup>16</sup>**: white solid, yield: 88%. <sup>1</sup>H NMR (400 MHz, CD<sub>3</sub>Cl) δ 8.20 (s, 1H), 7.94 – 7.78 (m, 4H), 7.55 – 7.44 (m, 3H), 5.38 (s, 2H). <sup>13</sup>C NMR (100 MHz, CD<sub>3</sub>Cl) δ 160.95, 133.31, 133.27, 132.70, 128.63, 128.13, 127.85, 127.71, 126.56, 126.54, 125.91, 77.48, 77.16, 76.84, 65.96. GC - MS (EI): [C<sub>12</sub>H<sub>10</sub>O<sub>2</sub>] calculated 186.21; measured 186.2; found m/z: 186.2, 158.1, 141.2, 129.2, 115.2, 44.1.

**naphthalen-2-ylmethyl propionate(table 4-8)<sup>18</sup>**: white solid, yield: 86%. <sup>1</sup>H NMR (400 MHz, CD<sub>3</sub>Cl) δ 7.85 (dd, *J* = 9.1, 2.7 Hz, 4H), 7.55 – 7.44 (m, 3H), 5.29 (s, 2H), 2.43 (q, *J* = 7.5 Hz, 2H), 1.20 (t, *J* = 7.6 Hz, 3H). <sup>13</sup>C NMR (100 MHz, CD<sub>3</sub>Cl) δ 174.49, 133.64, 133.32, 133.21, 128.49, 128.09, 127.83, 127.42, 126.41, 126.36, 126.01, 77.48, 77.16, 76.84, 66.40, 27.75, 9.24. GC - MS (EI): [C<sub>14</sub>H<sub>14</sub>O<sub>2</sub>] calculated 214.26; measured 214.2; found m/z: 214.2, 158.2, 141.2, 129.2, 115.2.

**naphthalen-2-ylmethyl acrylate(table 4-9-1)<sup>19</sup>**: white solid, yield: 42%. <sup>1</sup>H NMR (400 MHz, CD<sub>3</sub>Cl) δ 7.99 – 7.37 (m, 7H), 6.49 (dd, *J* = 17.4, 1.5 Hz, 1H), 6.21 (dd, *J* = 17.3, 10.4 Hz, 1H), 5.88 (dd, *J* = 10.4, 1.4 Hz, 1H), 5.38 (s, 2H).<sup>13</sup>C NMR (100 MHz, CD<sub>3</sub>Cl) δ 166.21, 133.37, 133.31, 133.25, 131.35, 128.53, 128.42, 128.11, 127.84, 127.52, 126.44, 126.42, 126.02, 77.48, 77.16, 76.84, 66.61. GC - MS (EI): [ C<sub>14</sub>H<sub>12</sub>O<sub>2</sub> ] calculated 212.25; measured 212.2; found m/z: 212.2, 158.2, 141.2, 129.2, 115.2, 55.2.

**ethyl 3-(naphthalen-2-ylmethoxy)propanoate(table 4-9-2)**: colorless liquid, yield: 51%. <sup>1</sup>H NMR (400 MHz, CD<sub>3</sub>Cl) δ 7.93 – 7.66 (m, 4H), 7.47 (q, *J* = 4.4 Hz, 3H), 4.70 (s, 2H), 4.16 (q, *J* = 6.4 Hz, 2H), 3.80 (t, *J* = 4.9 Hz, 2H), 2.64 (t, *J* = 5.1 Hz, 2H), 1.26 (t, *J* = 6.7 Hz, 3H).<sup>13</sup>C NMR (100 MHz, CD<sub>3</sub>Cl) δ 171.78, 135.71, 133.38, 133.13, 128.31, 127.99, 127.82, 126.56, 126.22, 125.99, 125.84, 77.48, 77.16, 76.84, 73.34, 65.80, 60.69, 35.36, 14.32. GC - MS (EI): [C<sub>16</sub>H<sub>18</sub>O<sub>3</sub>] calculated 258.32; measured 258.3; found m/z: 258.3, 212.2, 157.2, 141.2, 129.2, 115.2, 102.2, 74.2, 55.2.

**naphthalen-2-ylmethyl pivalate(table 4-10,11)<sup>20</sup>**: white solid, yield: 57% (4-10); 60% (4-11). <sup>1</sup>H NMR (400 MHz, CD<sub>3</sub>Cl) δ 7.93 – 7.78 (m, 4H), 7.51 – 7.41 (m, 3H), 5.27 (s, 2H), 1.25 (s, 9H).<sup>13</sup>C NMR (100 MHz, CD<sub>3</sub>Cl) δ 178.56, 134.01, 133.32, 133.16, 128.45, 128.10, 127.85, 127.00, 126.40, 126.30, 125.74, 66.36, 38.99, 27.35. GC - MS (EI): [C<sub>16</sub>H<sub>18</sub>O<sub>2</sub>] calculated 242.32; measured 242.2; found m/z: 242.2, 158.2, 141.3, 127.2, 115.2, 85.2, 57.3, 41.2.

**naphthalen-2-ylmethyl benzoate(table 4-13)<sup>21</sup>**: white solid, yield: 84%. <sup>1</sup>H NMR (400 MHz, CD<sub>3</sub>Cl) δ 8.15 – 8.08 (m, 2H), 7.92 (d, *J* = 1.6 Hz, 1H), 7.89 – 7.83 (m, 3H), 7.60 – 7.55 (m, 2H), 7.52 – 7.49 (m, 2H), 7.45 (dd, *J* = 8.4, 7.0 Hz, 2H), 5.54 (s, 2H).<sup>13</sup>C NMR (100 MHz, CD<sub>3</sub>Cl) δ 166.64, 133.60, 133.35, 133.28, 133.22, 130.26, 129.88, 128.57, 128.54, 128.15, 127.87, 127.48, 126.47, 126.42, 126.03, 77.48, 77.16, 76.84, 67.01. GC - MS (EI): [C<sub>18</sub>H<sub>14</sub>O<sub>2</sub>] calculated 262.31; measured 262.2; found m/z: 262.2, 155.2, 141.2, 127.2, 115.2, 105.1, 77.2, 51.2.

**1-phenylpropyl acetate(table 5-2)<sup>17</sup>**: colorless liquid, yield: 44%. <sup>1</sup>H NMR (400 MHz, CD<sub>3</sub>Cl) δ 7.40 – 7.23 (m, 5H), 5.66 (dd, *J* = 7.3, 6.5 Hz, 1H), 2.08 (s, 3H), 1.92 (dq, *J* = 14.8, 7.4 Hz, 1H), 1.82 (dq, *J* = 13.9, 7.1 Hz, 1H), 0.88 (t, *J* = 7.4 Hz, 3H).<sup>13</sup>C NMR (100 MHz, CD<sub>3</sub>Cl) δ 170.60, 140.68, 128.52, 127.96, 126.71, 77.48, 77.16, 76.84, 29.42, 21.41, 10.04. GC - MS (EI): [C<sub>11</sub>H<sub>14</sub>O<sub>2</sub>] calculated 178.23; measured 178.4; found m/z: 178.4, 149.4, 136.4, 117.4, 107.4, 91.4, 79.3, 43.4.

**1-phenylpentyl acetate(table 5-3)<sup>17</sup>:** colorless liquid, yield: 33%. <sup>1</sup>H NMR (400 MHz, CD<sub>3</sub>Cl) δ 7.43 – 7.21 (m, 5H), 5.75 – 5.69 (m, 1H), 2.07 (s, 3H), 1.97 – 1.69 (m, 2H), 1.40 – 1.16 (m, 4H), 0.87 (t, *J* = 7.0 Hz, 3H).<sup>13</sup>C NMR (100 MHz, CD<sub>3</sub>Cl) δ 170.58, 141.01, 128.53, 127.94, 126.67, 77.48, 77.16, 76.84, 76.30, 36.17, 27.78, 22.56, 21.44, 14.06. GC - MS (EI): [C<sub>13</sub>H<sub>18</sub>O<sub>2</sub>] calculated 206.29; measured 206.3; found m/z: 206.3, 164.4, 149.4, 115.2, 104.3, 91.3, 77.2, 43.3.

**2-methyl-1-phenylpropyl acetate(table 5-4)<sup>17</sup>:** colorless liquid, yield: 15%. <sup>1</sup>H NMR (400 MHz, CD<sub>3</sub>Cl) δ 7.37 – 7.21 (m, 5H), 5.45 (d, *J* = 7.6 Hz, 1H), 2.14 – 2.07 (m, 1H), 2.06 (s, 3H), 0.96 (d, *J* = 6.7 Hz, 3H), 0.79 (d, *J* = 6.8 Hz, 3H).<sup>13</sup>C NMR (100 MHz, CD<sub>3</sub>Cl) δ 170.53, 139.87, 128.28, 127.81, 127.17, 81.09, 77.48, 77.16, 76.84, 33.62, 21.32, 18.81, 18.62. GC - MS (EI): [C<sub>12</sub>H<sub>16</sub>O<sub>2</sub>] calculated 192.26; measured 192.3; found m/z: 192.3, 149.4, 132.3, 117.2, 107.4, 91.4, 79.4, 43.4.

**1-(4-methoxyphenyl)ethyl acetate(table 5-5)<sup>3</sup>:** colorless liquid, yield: 63%. <sup>1</sup>H NMR (400 MHz, CD<sub>3</sub>Cl) δ 7.30 (d, *J* = 8.6 Hz, 2H), 6.88 (d, *J* = 8.6 Hz, 2H), 5.85 (q, *J* = 6.6 Hz, 1H), 3.80 (s, 3H), 2.05 (s, 2H), 1.52 (d, *J* = 6.6 Hz, 3H).<sup>13</sup>C NMR (101 MHz, CD<sub>3</sub>Cl) δ 170.55, 159.39, 133.86, 127.73, 113.95, 77.48, 77.16, 76.84, 72.14, 55.39, 22.06, 21.53. GC - MS (EI): [C<sub>11</sub>H<sub>14</sub>O<sub>3</sub>] calculated 194.23; measured 194.2; found m/z: 194.2, 137.2, 134.2, 119.2, 91.2, 77.2, 43.2.

**1-(p-tolyl)ethyl acetate(table 5-6)<sup>3</sup>:** colorless liquid, yield: 58%. <sup>1</sup>H NMR (400 MHz, CD<sub>3</sub>Cl) δ 7.25 (d, *J* = 8.2 Hz, 2H), 7.16 (d, *J* = 8.3 Hz, 2H), 5.86 (q, *J* = 6.6 Hz, 1H), 2.34 (s, 3H), 2.06 (s, 3H), 1.52 (d, *J* = 6.6 Hz, 3H).<sup>13</sup>C NMR (100 MHz, CD<sub>3</sub>Cl) δ 170.50, 138.77, 137.74, 129.25, 126.22, 77.43, 77.12, 76.80, 72.32, 22.18, 21.48, 21.22. GC - MS (EI): [C<sub>11</sub>H<sub>14</sub>O<sub>3</sub>] calculated 178.23; measured 178.2; found m/z: 178.2, 136.3, 121.3, 117.3, 91.3, 77.2, 43.2.

**1-(4-(trifluoromethyl)phenyl)ethyl acetate(table 5-7)<sup>3</sup>:** colorless liquid, yield: 53%. <sup>1</sup>H NMR (400 MHz, CD<sub>3</sub>Cl) δ 7.61 (d, *J* = 8.1 Hz, 2H), 7.46 (d, *J* = 8.2 Hz, 1H), 5.90 (q, *J* = 6.6 Hz, 1H), 2.09 (s, 3H).<sup>13</sup>C NMR (100 MHz, CD<sub>3</sub>Cl) δ 170.34, 145.85, 130.18 (d, *J* = 32.1 Hz), 129.71, 125.76 – 125.60 (m), 124.18 (d, *J* = 272.3 Hz), 77.48, 77.16, 76.84, 71.76, 22.41, 21.37.<sup>19</sup>F NMR (376 MHz, CD<sub>3</sub>Cl) δ -62.49. GC - MS (EI): [C<sub>11</sub>H<sub>11</sub>F<sub>3</sub>O<sub>2</sub>] calculated 232.20; measured 232.2; found m/z: 232.2, 213.2, 190.4, 172.3, 153.2, 145.2, 133.2, 127.2, 121.3, 103.3, 91.2, 77.2, 43.4.

**1-(3-nitrophenyl)ethyl acetate(table 5-8)<sup>26</sup>:** light yellow liquid, yield: 69%. <sup>1</sup>H NMR (400 MHz, CD<sub>3</sub>Cl) δ 8.26 – 8.20 (m, 1H), 8.17 – 8.13 (m, 1H), 7.71 – 7.63 (m, 1H), 7.57 – 7.49 (m, 1H), 5.93 (q, *J* = 6.7 Hz, 1H), 2.11 (s, 3H), 1.57 (d, *J* = 6.6 Hz, 3H).<sup>13</sup>C NMR (100 MHz, CD<sub>3</sub>Cl) δ 170.27, 148.56, 144.04, 132.42, 129.69, 122.99, 121.12, 77.48, 77.16, 76.84, 71.29, 22.38, 21.33. GC -

MS (EI): [C<sub>10</sub>H<sub>11</sub>NO<sub>4</sub>] calculated 209.20; measured 209; found m/z: 209, 167.2, 149.3, 132.2, 119.2, 103.3, 91.2, 77.3, 43.4.

**1-(4-chlorophenyl)ethyl acetate(table 5-9)<sup>3</sup>**: colorless liquid, yield: 64%. <sup>1</sup>H NMR (400 MHz, CD<sub>3</sub>Cl) δ 7.39 – 7.21 (m, 5H), 5.83 (q, *J* = 6.6 Hz, 1H), 2.07 (s, 3H), 1.51 (d, *J* = 6.6 Hz, 3H).<sup>13</sup>C NMR (100 MHz, CD<sub>3</sub>Cl) δ 170.38, 140.34, 133.75, 128.81, 127.66, 77.48, 77.16, 76.84, 71.73, 22.28, 21.43. GC - MS (EI): [C<sub>10</sub>H<sub>11</sub>ClO<sub>2</sub>] calculated 198.65; measured 198.2; found m/z: 200.2, 198.2, 158.2, 156.2, 141.3, 138.2, 121.2, 103.4, 91.2, 77.3, 75.2, 43.4.

**1-([1,1'-biphenyl]-4-yl)ethyl acetate(table 5-10)<sup>24</sup>**: white solid, yield: 58%. <sup>1</sup>H NMR (400 MHz, CD<sub>3</sub>Cl) δ 7.66 – 7.52 (m, 4H), 7.52 – 7.41 (m, 4H), 7.40 – 7.33 (m, 1H), 5.95 (q, *J* = 6.6 Hz, 1H), 2.11 (s, 3H), 1.59 (d, *J* = 6.6 Hz, 3H).<sup>13</sup>C NMR (100 MHz, CD<sub>3</sub>Cl) δ 170.53, 141.00, 140.88, 140.77, 128.90, 127.48, 127.41, 127.25, 126.71, 77.48, 77.16, 76.84, 72.23, 22.27, 21.51. GC - MS (EI): [C<sub>16</sub>H<sub>16</sub>O<sub>2</sub>] calculated 240.30; measured 240.2; found m/z: 240.2, 198.2, 180.2, 165.2, 152.2, 139.2, 77.2, 43.2.

**1-(naphthalen-2-yl)ethyl acetate(table 5-11)<sup>3</sup>**: colorless liquid, yield: 57%. <sup>1</sup>H NMR (400 MHz, CD<sub>3</sub>Cl) δ 7.71 – 7.55 (m, 4H), 7.35 – 7.20 (m, 3H), 5.85 (q, *J* = 6.6 Hz, 1H), 1.90 (s, 3H), 1.42 (d, *J* = 6.6 Hz, 3H).<sup>13</sup>C NMR (100 MHz, CD<sub>3</sub>Cl) δ 170.52, 139.13, 133.30, 133.14, 128.49, 128.15, 127.79, 126.36, 126.19, 125.15, 124.22, 77.48, 77.16, 76.84, 72.57, 22.31, 21.52. GC - MS (EI): [C<sub>14</sub>H<sub>14</sub>O<sub>2</sub>] calculated 214.26; measured 214.2; found m/z: 214.2, 172.2, 154.2, 127.2, 115.1, 77.2, 43.2.

**1-(naphthalen-1-yl)ethyl acetate(table 5-12)<sup>3</sup>**: colorless liquid, yield: 53%. <sup>1</sup>H NMR (400 MHz, CD<sub>3</sub>Cl) δ 8.13 – 8.07 (m, 1H), 7.92 – 7.85 (m, 1H), 7.85 – 7.78 (m, 1H), 7.65 – 7.59 (m, 1H), 7.58 – 7.45 (m, 3H), 6.67 (q, *J* = 6.6 Hz, 1H), 2.14 (s, 3H), 1.72 (d, *J* = 6.7 Hz, 3H).<sup>13</sup>C NMR (100 MHz, CD<sub>3</sub>Cl) δ 170.51, 137.53, 133.94, 130.36, 129.04, 128.57, 126.43, 125.80, 125.48, 123.31, 123.27, 77.48, 77.16, 76.84, 69.56, 21.81, 21.49. GC - MS (EI): [C<sub>14</sub>H<sub>14</sub>O<sub>2</sub>] calculated 214.26; measured 214.3; found m/z: 214.3, 172.2, 153.3, 129.2, 115.1, 77.2, 43.2.

**9H-fluoren-9-yl acetate(table 5-13)<sup>4</sup>**: yellow solid, yield: 78%. <sup>1</sup>H NMR (400 MHz, CD<sub>3</sub>Cl) δ 7.69 – 7.27 (m, 8H), 6.80 (s, 1H), 2.20 (s, 3H).<sup>13</sup>C NMR (100 MHz, CD<sub>3</sub>Cl) δ 171.95, 144.57, 142.14, 141.16, 134.83, 134.28, 129.63, 129.22, 127.99, 126.02, 124.46, 120.44, 120.17, 75.27, 21.39. GC - MS (EI): [C<sub>15</sub>H<sub>12</sub>O<sub>2</sub>] calculated 224.26; measured 224.2; found m/z: 224.2, 182.2, 165.2, 152.3, 129.2, 115.2, 82.6, 43.2.

**phenyl(4-(trifluoromethyl)phenyl)methyl acetate(table 5-14)**: colorless liquid, yield: 49%. <sup>1</sup>H NMR (400 MHz, CD<sub>3</sub>Cl) δ 7.67 – 7.56 (m, 2H), 7.50 – 7.45 (m, 2H), 7.39 – 7.35 (m, 1H), 7.35 – 7.29 (m, 4H), 6.90 (s, 1H), 2.18 (s, 3H).<sup>13</sup>C NMR (100 MHz, CD<sub>3</sub>Cl) δ 170.03, 144.28, 139.49, 130.20 (d, *J* = 32.6 Hz), 128.86, 128.48, 127.39, 127.31, 125.67 (q, *J* = 3.8 Hz), 124.13 (d, *J* = 272.1 Hz), 77.48, 77.16, 76.84, 76.38, 21.33.<sup>19</sup>F NMR (376 MHz, CD<sub>3</sub>Cl) δ -62.51. GC - MS (EI): [C<sub>15</sub>H<sub>12</sub>O<sub>2</sub>] calculated 294.27; measured 294.2; found m/z: 294.2, 252.3, 234.4, 215.2, 183.2, 165.4, 145.1, 129.2, 115.2, 77.2, 43.2.

**(4-methoxyphenyl)(phenyl)methyl acetate(table 5-15)<sup>24</sup>**: colorless liquid, yield: 51%. <sup>1</sup>H NMR (400 MHz, CD<sub>3</sub>Cl) δ 7.37 – 7.32 (m, 4H), 7.27 (d, *J* = 8.5 Hz, 3H), 6.88 (s, 1H), 6.86 (s, 2H), 3.80 (s, 3H), 2.16 (s, 3H).<sup>13</sup>C NMR (100 MHz, CD<sub>3</sub>Cl) δ 170.25, 159.41, 140.54, 132.55, 128.83, 128.58, 127.88, 126.97, 113.99, 77.48, 77.16, 76.84, 76.67, 55.39, 21.45. GC - MS (EI): [C<sub>16</sub>H<sub>16</sub>O<sub>3</sub>] calculated 256.30; measured 256.2; found m/z: 256.2, 213.2, 196.2, 181.2, 165.2, 153.2, 77.2, 43.2.

**(4-chlorophenyl)(phenyl)methyl acetate(table 5-16)<sup>24</sup>**: colorless liquid, yield: 56%. <sup>1</sup>H NMR (400 MHz, CD<sub>3</sub>Cl) δ 7.41 – 7.22 (m, 9H), 6.85 (s, 1H), 2.17 (s, 3H).<sup>13</sup>C NMR (100 MHz, CD<sub>3</sub>Cl) δ 170.07, 139.84, 138.89, 133.92, 128.83, 128.74, 128.63, 128.26, 127.15, 77.48, 77.16, 76.84, 76.30, 21.36. GC - MS (EI): [C<sub>15</sub>H<sub>13</sub>ClO<sub>2</sub>] calculated 260.72; measured 260.2; found m/z: 260.2, 218.2, 183.2, 165.4, 139.1, 77.2, 43.2.

**bis(4-chlorophenyl)methyl acetate(table 5-17)<sup>27</sup>**: colorless liquid, yield: 45%. <sup>1</sup>H NMR (400 MHz, CD<sub>3</sub>Cl) δ 7.34 – 7.29 (m, 4H), 7.27 – 7.22 (m, 4H), 6.80 (s, 1H), 2.16 (s, 3H).<sup>13</sup>C NMR (100 MHz, CD<sub>3</sub>Cl) δ 169.96, 138.39, 134.18, 128.95, 128.58, 77.48, 77.16, 76.84, 75.61, 21.32. GC - MS (EI): [C<sub>15</sub>H<sub>12</sub>Cl<sub>2</sub>O<sub>2</sub>] calculated 294.02; measured 294.2; found m/z: 294.2, 252.1, 234.1, 199.2, 165.2, 139.1, 75.2, 43.2.

**2,3-dihydro-1H-inden-2-yl acetate(table 5-18)<sup>28</sup>**: white solid, yield: 56%. <sup>1</sup>H NMR (400 MHz, CD<sub>3</sub>Cl) δ 7.27 – 7.17 (m, 4H), 5.53 (tt, *J* = 6.3, 3.0 Hz, 1H), 3.32 (dd, *J* = 16.8, 6.4 Hz, 2H), 3.02 (dd, *J* = 16.9, 3.0 Hz, 2H), 2.03 (s, 2H).<sup>13</sup>C NMR (100 MHz, CD<sub>3</sub>Cl) δ 171.24, 140.56, 126.91, 124.77, 77.48, 77.16, 76.84, 75.43, 39.70, 21.43. GC - MS (EI): [C<sub>11</sub>H<sub>12</sub>O<sub>2</sub>] calculated 176.2; measured 176.2; found m/z: 176.2, 133.2, 115.2, 105.2, 91.2, 77.2, 43.3.

**1-phenylpropan-2-yl acetate(table 5-19)<sup>3</sup>**: colorless liquid, yield: 32%. <sup>1</sup>H NMR (400 MHz, CD<sub>3</sub>Cl) δ 7.32 – 7.27 (m, 2H), 7.24 – 7.21 (m, 1H), 7.21 – 7.17 (m, 2H), 5.11 (h, *J* = 6.4 Hz, 1H),

2.93 (dd,  $J = 13.6, 6.7$  Hz, 1H), 2.75 (dd,  $J = 13.6, 6.5$  Hz, 1H), 2.00 (s, 3H), 1.22 (d,  $J = 6.3$  Hz, 3H).  $^{13}\text{C}$  NMR (100 MHz,  $\text{CD}_3\text{Cl}$ )  $\delta$  170.73, 137.75, 129.56, 128.47, 126.61, 77.48, 77.16, 76.84, 71.61, 42.37, 21.46, 19.58. GC - MS (EI): [ $\text{C}_{11}\text{H}_{14}\text{O}_2$ ] calculated 178.23; measured 178.0; found  $m/z$ : 178.0, 118.2, 91.2, 77.1, 65.2, 43.3.

**2-phenoxy-1-phenylethyl acetate(table 5-20)**: yellow liquid, yield: 69%.  $^1\text{H}$  NMR (400 MHz,  $\text{CD}_3\text{Cl}$ )  $\delta$  7.48 – 7.33 (m, 5H), 7.32 – 7.22 (m, 2H), 7.00 – 6.93 (m, 1H), 6.92 – 6.86 (m, 2H), 6.16 (dd,  $J = 7.9, 3.9$  Hz, 1H), 4.28 (dd,  $J = 10.5, 7.9$  Hz, 1H), 4.16 (dd,  $J = 10.4, 3.9$  Hz, 1H), 2.13 (s, 3H).  $^{13}\text{C}$  NMR (100 MHz,  $\text{CD}_3\text{Cl}$ )  $\delta$  170.33, 158.58, 137.23, 129.63, 128.78, 128.68, 126.94, 121.35, 114.89, 77.48, 77.16, 76.84, 74.13, 70.51, 21.30. GC - MS (EI): [ $\text{C}_{16}\text{H}_{16}\text{O}_3$ ] calculated 256.30; measured 256.2; found  $m/z$ : 256.2, 163.3, 91.2, 77.2, 65.2, 43.3.

**1,2-diphenylethyl acetate(table 5-21)<sup>29</sup>**: colorless liquid, yield: 44%.  $^1\text{H}$  NMR (400 MHz,  $\text{CD}_3\text{Cl}$ )  $\delta$  7.36 – 7.09 (m, 10H), 5.96 (dd,  $J = 8.0, 6.0$  Hz, 1H), 3.21 (dd,  $J = 13.8, 8.0$  Hz, 1H), 3.06 (dd,  $J = 13.7, 6.1$  Hz, 1H), 2.03 (s, 3H).  $^{13}\text{C}$  NMR (100 MHz,  $\text{CD}_3\text{Cl}$ )  $\delta$  170.26, 140.17, 137.14, 129.63, 128.49, 128.36, 128.10, 126.73, 126.68, 77.48, 77.16, 76.84, 76.76, 43.09, 21.29. GC - MS (EI): [ $\text{C}_{16}\text{H}_{16}\text{O}_2$ ] calculated 240.30; measured 240.3; found  $m/z$ : 240.3, 198.2, 107.1, 77.2, 65.2, 43.2.

**1-phenylethane-1,2-diyl diacetate(table 5-22-1)<sup>22</sup>**: colorless liquid, yield: 25%.  $^1\text{H}$  NMR (400 MHz,  $\text{CD}_3\text{Cl}$ )  $\delta$  7.39 – 7.34 (m, 6H), 6.09 – 5.95 (m, 1H), 4.34 – 4.27 (m, 2H), 2.12 (s, 3H), 2.05 (s, 3H).  $^{13}\text{C}$  NMR (100 MHz,  $\text{CD}_3\text{Cl}$ )  $\delta$  170.81, 170.23, 136.61, 128.78, 126.83, 77.48, 77.16, 76.84, 73.45, 66.22, 21.22, 20.90. GC - MS (EI): [ $\text{C}_{12}\text{H}_{14}\text{O}_4$ ] calculated 222.24; measured 222.1; found  $m/z$ : 179.2, 162.2, 107.4, 91.2, 79.3, 51.3, 43.4.

**2-hydroxy-2-phenylethyl acetate(table 5-22-2)<sup>22</sup>**: colorless liquid, yield: 51%.  $^1\text{H}$  NMR (400 MHz,  $\text{CD}_3\text{Cl}$ )  $\delta$  7.44 – 7.28 (m, 5H), 4.95 (dd,  $J = 8.4, 3.3$  Hz, 1H), 4.27 (dd,  $J = 11.6, 3.4$  Hz, 1H), 4.15 (dd,  $J = 11.6, 8.4$  Hz, 1H), 2.10 (s, 3H).  $^{13}\text{C}$  NMR (100 MHz,  $\text{CD}_3\text{Cl}$ )  $\delta$  171.41, 139.87, 128.71, 128.37, 126.26, 77.48, 77.16, 76.84, 72.48, 69.42, 21.01. GC - MS (EI): [ $\text{C}_{10}\text{H}_{12}\text{O}_3$ ] calculated 180.20; measured 180.20; found  $m/z$ : 180.20, 163.3, 149.2, 107.3, 91.2, 79.4, 51.2, 43.3.

**2-hydroxy-1-phenylethyl acetate(table 5-22-3)<sup>22</sup>**: colorless liquid, yield: 14%.  $^1\text{H}$  NMR (400 MHz,  $\text{CD}_3\text{Cl}$ )  $\delta$  7.43 – 7.27 (m, 5H), 5.85 (dd,  $J = 7.5, 4.1$  Hz, 1H), 3.88 (dd,  $J = 12.0, 7.5$  Hz, 1H), 3.81 (dd,  $J = 12.1, 4.1$  Hz, 1H), 2.14 (s, 3H).  $^{13}\text{C}$  NMR (100 MHz,  $\text{CD}_3\text{Cl}$ )  $\delta$  170.84, 137.15, 128.77, 128.57, 126.76, 77.48, 77.16, 76.98, 76.84, 66.10, 21.32. GC - MS (EI): [ $\text{C}_{10}\text{H}_{12}\text{O}_3$ ]

calculated 180.20; measured 180.3; found m/z: 180.3, 162.2, 149.2, 120.2 107.2, 91.2, 79.2, 65.2, 43.2.

**(±)-exo-1,3,3-Trimethyl-2-oxabicyclo[2.2.2]octane-5-yl acetate(table 5-23)<sup>30</sup>**: colorless liquid, yield: 44%. <sup>1</sup>H NMR (400 MHz, CD<sub>3</sub>Cl) δ 4.97 (ddd, *J* = 10.6, 6.0, 2.3 Hz, 1H), 2.13 – 2.06 (m, 2H), 2.05 (d, *J* = 0.6 Hz, 3H), 1.77 – 1.70 (m, 2H), 1.66 – 1.60 (m, 1H), 1.52 – 1.41 (m, 2H), 1.35 (s, 2H), 1.23 (s, 2H), 1.11 (s, 3H).<sup>13</sup>C NMR (100 MHz, CD<sub>3</sub>Cl) δ 170.90, 73.27, 72.92, 70.13, 40.38, 37.50, 30.54, 30.30, 30.24, 26.89, 21.65, 21.15. GC - MS (EI): [C<sub>12</sub>H<sub>20</sub>O<sub>3</sub>] calculated 212.29; measured 212.3; found m/z: 212.3, 197.4, 170.3, 137.4, 127.2, 109.4, 93.4, 83.3, 55.3, 43.4.

## Reference:

- [1]Singha R, Ray J K. Selective acetylation of primary alcohols by ethyl acetate[J]. Tetrahedron Letters, 2016, 57(48): 5395-5398.
- [2]Basumatary G, Bez G. Ethyl acetate as an acetyl surrogate for the iodine catalyzed acetylation of alcohols[J]. Tetrahedron Letters, 2017, 58(45): 4312-4315.
- [3]Päiviö M ,Mavrynsky D ,Leino R , et al.Dynamic Kinetic Resolution of a Wide Range of Secondary Alcohols: Cooperation of Dicarboxylchlorido(pentabenzylcyclopentadienyl)ruthenium and CAL-B[J].European Journal of Organic Chemistry,2011,2011(8):1452-1457.
- [4]Mallesha N, Rao S P, Suhas R, et al. A green method for selective acetylation of primary alcohols using ethyl acetate and solid potassium carbonate[J]. Journal of Chemical Research, 2011, 35(9): 536-539.
- [5]Alam M M, Atkore S T, Kamble V T, et al. ZrCl<sub>4</sub>-Mg (ClO<sub>4</sub>)<sub>2</sub>: Highly efficient bimetallic catalyst for acetylation of alcohol with acetic acid[J]. Bulletin of the Korean Chemical Society, 2022, 43(4): 570-576.
- [6]Velusamy S, Borpuzari S, Punniyamurthy T. Cobalt (II)-catalyzed direct acetylation of alcohols with acetic acid[J]. Tetrahedron, 2005, 61(8): 2011-2015.
- [7]Cao W, Chen P, Tang Y. Total Synthesis of Isohericenone J via a Stille Coupling Reaction[J]. Journal of Natural Products, 2020, 83(5): 1701-1705.
- [8]Ahmed N, van Lier J E. Molecular iodine in isopropenyl acetate (IPA): a highly efficient catalyst for the acetylation of alcohols, amines and phenols under solvent free conditions[J]. Tetrahedron Letters, 2006, 47(30): 5345-5349.
- [9]Watson K J, Park S J, Im J H, et al. DNA-Block Copolymer Conjugates[J]. JACS, 2001, 123(23): 5592-5593.
- [10]Kadam S ,Kim S .Thallium(III) Chloride: A Mildand Efficient Catalyst for Acylation of Alcohols, Phenolsand Thiols, and for Geminal Diacylation of Aldehydes underSolvent-Free Conditions[J].Synthesis,2008,2008(20):3307-3313.
- [11]Farhadi ,Saeid,Zareisahamieh , et al. H<sub>6</sub>GeMo<sub>10</sub>V<sub>2</sub>O<sub>40</sub>•16H<sub>2</sub>O nanoparticles prepared by hydrothermal method: a new and reusable heteropoly acid catalyst for highly efficient acetylation of alcohols and phenols under solvent-free conditions[J].Journal of the Brazilian Chemical



Society,2011,22(7):1323-1332.

[12]Du G, Moulin E, Jouault N, et al. Muscle-like supramolecular polymers: integrated motion from thousands of molecular machines[J]. *Angewandte Chemie*, 2012, 124(50): 12672-12676.

[13]Karaki F, Kuwada M, Tajiri S, et al. A deprotection procedure using SO<sub>3</sub>H silica gel to remove non-silyl protecting groups[J]. *Synthetic Communications*, 2019, 49(2): 212-220.

[14]Lu P, Hou T, Gu X, et al. Visible-Light-Promoted Conversion of Alkyl Benzyl Ether to Alkyl Ester or Alcohol via O- $\alpha$ -sp<sup>3</sup> C-H Cleavage.[J]. *Organic letters*, 2015, 17(8): 1954-1957.

[15]Lyons D J M, Empel C, Pace D P, et al. Tropolonate salts as acyl-transfer catalysts under thermal and photochemical conditions: reaction scope and mechanistic insights[J]. *ACS Catalysis*, 2020, 10(21): 12596-12606.

[16]HSU C ,HSUEH S .System and method for preparing aromatic derivative[P].US2018057429,2018-03-01

[17]Hoang H N, Matsuda T. Expanding substrate scope of lipase-catalyzed transesterification by the utilization of liquid carbon dioxide[J]. *Tetrahedron*, 2016, 72(46): 7229-7234.

[18]Podyacheva E, Afanasyev O I, Ostrovskii V S, et al. Syngas Instead of Hydrogen Gas as a Reducing Agent— A Strategy To Improve the Selectivity and Efficiency of Organometallic Catalysts[J]. *ACS Catalysis*, 2022, 12(9): 5145-5154.

[19]Odanaka Y, Kanemitsu T, Iwasaki K, et al. Asymmetric Michael addition of malonic diesters to acrylates by phase-transfer catalysis toward the construction of quaternary stereogenic  $\alpha$ -carbons[J]. *Tetrahedron*, 2019, 75(2): 209-219.

[20]Rao C B, Chinnababu B, Venkateswarlu Y. An efficient protocol for alcohol protection under solvent-and catalyst-free conditions[J]. *The Journal of organic chemistry*, 2009, 74(22): 8856-8858.

[21]Carlson E, Hong D, Tam W. Type 2 Ring-Opening Reactions of Cyclopropanated 7-Oxabenzonorbornadienes with Carboxylic Acid Nucleophiles[J]. *Synthesis*, 2016, 48(23): 4253-4259.

[22]Taylor J E, Williams J M J, Bull S D. N-Acyl 1, 5-diazabicyclo [4.3. 0] non-5-ene (DBN) tetraphenylborate salts as O-acylating agents[J]. *Tetrahedron Letters*, 2012, 53(32): 4074-4076.

[23]Fernández-Salas J A, Manzini S, Nolan S P. A cationic ruthenium complex for the dynamic kinetic resolution of secondary alcohols[J]. *Chemistry—A European Journal*, 2014, 20(41): 13132-

13135.

[24]Dohi T, Ueda S, Iwasaki K, et al. Selective carboxylation of reactive benzylic C–H bonds by a hypervalent iodine (III)/inorganic bromide oxidation system[J]. *Beilstein Journal of Organic Chemistry*, 2018, 14(1): 1087-1094.

[25]Pan D, Pan Z, Hu Z, et al. Metal-Free Aerobic Oxidative C–O Coupling of C (sp<sup>3</sup>)–H with Carboxylic Acids Catalyzed by DDQ and tert-Butyl Nitrite[J]. *European Journal of Organic Chemistry*, 2019, 2019(33): 5650-5655.

[26]Hatzakis N S, Smonou I. Asymmetric transesterification of secondary alcohols catalyzed by feruloyl esterase from *Humicola insolens*[J]. *Bioorganic chemistry*, 2005, 33(4): 325-337.

[27]Laurent M, Marchand-Brynaert J. A practical synthesis of para di-and mono-substituted benzhydrylamines from benzhydrol precursors[J]. *Synthesis*, 2000, 2000(05): 667-672.

[28]Göksu S, Seçen H. Concise syntheses of 2-aminoindans via indan-2-ol[J]. *Tetrahedron*, 2005, 61(28): 6801-6807.

[29]Kim M J, Choi Y K, Kim S, et al. Highly enantioselective dynamic kinetic resolution of 1, 2-diarylethanol by a lipase– ruthenium couple[J]. *Organic Letters*, 2008, 10(6): 1295-1298.

[30]Luzzio F A, Duveau D Y. Enzymatic resolution of the 1, 3, 3-trimethyl-2-oxabicyclo [2.2.2] octane (1, 8-cineole) system[J]. *Tetrahedron: Asymmetry*, 2002, 13(11): 1173-1180.

## IV. NMR spectra of the products

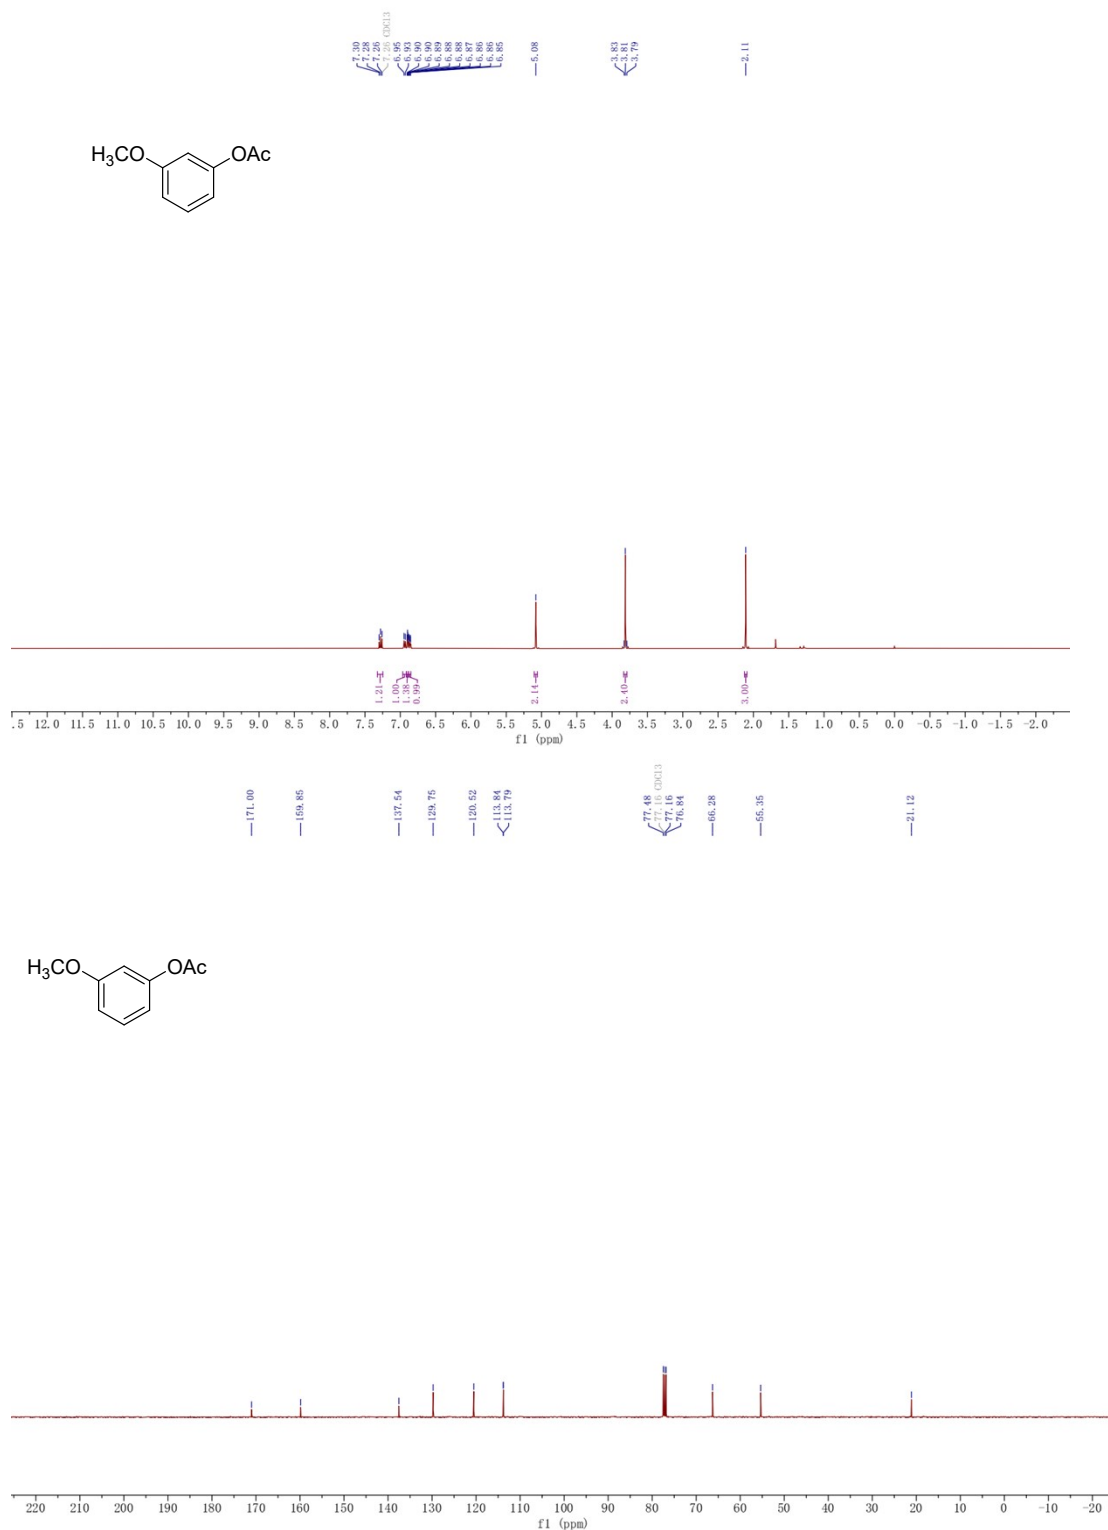

**Figure S1.** <sup>1</sup>H (top) and <sup>13</sup>C (bottom) NMR spectra of 3-methoxyphenyl acetate from (3-methoxyphenyl)methanol (table 3, entry 1).

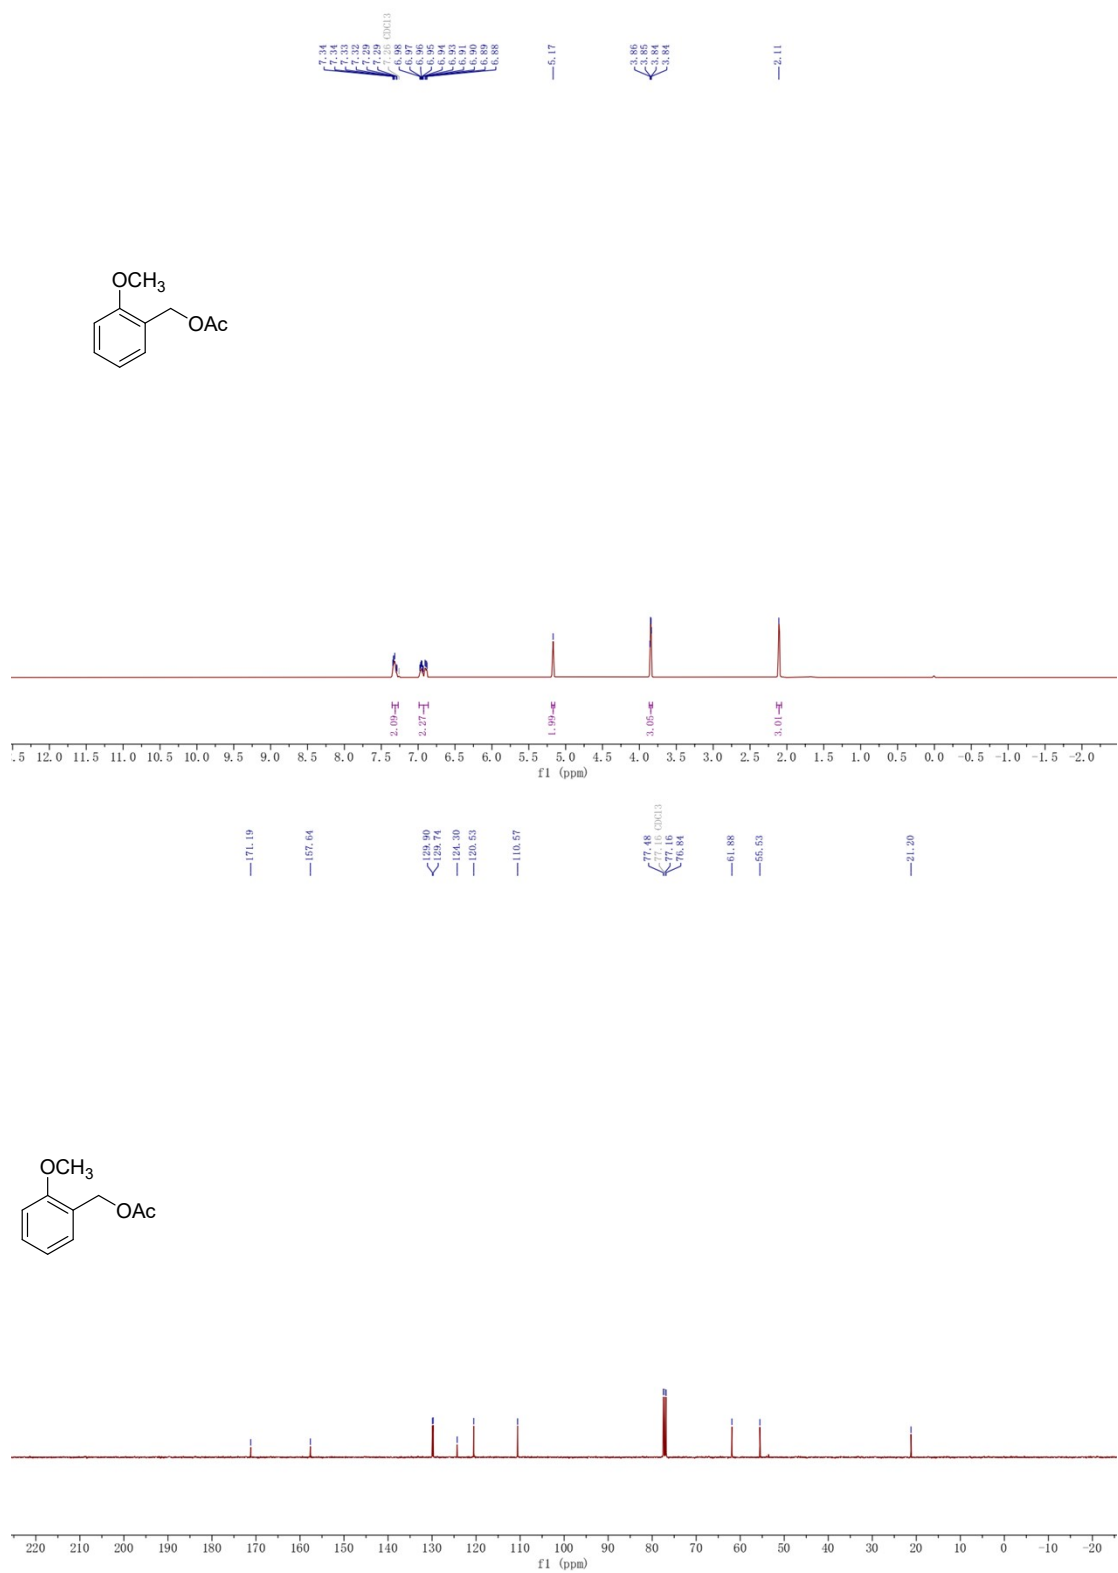

**Figure S2.** <sup>1</sup>H (top) and <sup>13</sup>C (bottom) NMR spectra of 2-methoxyphenyl acetate from (2-methoxyphenyl)methanol (table 3, entry 2).

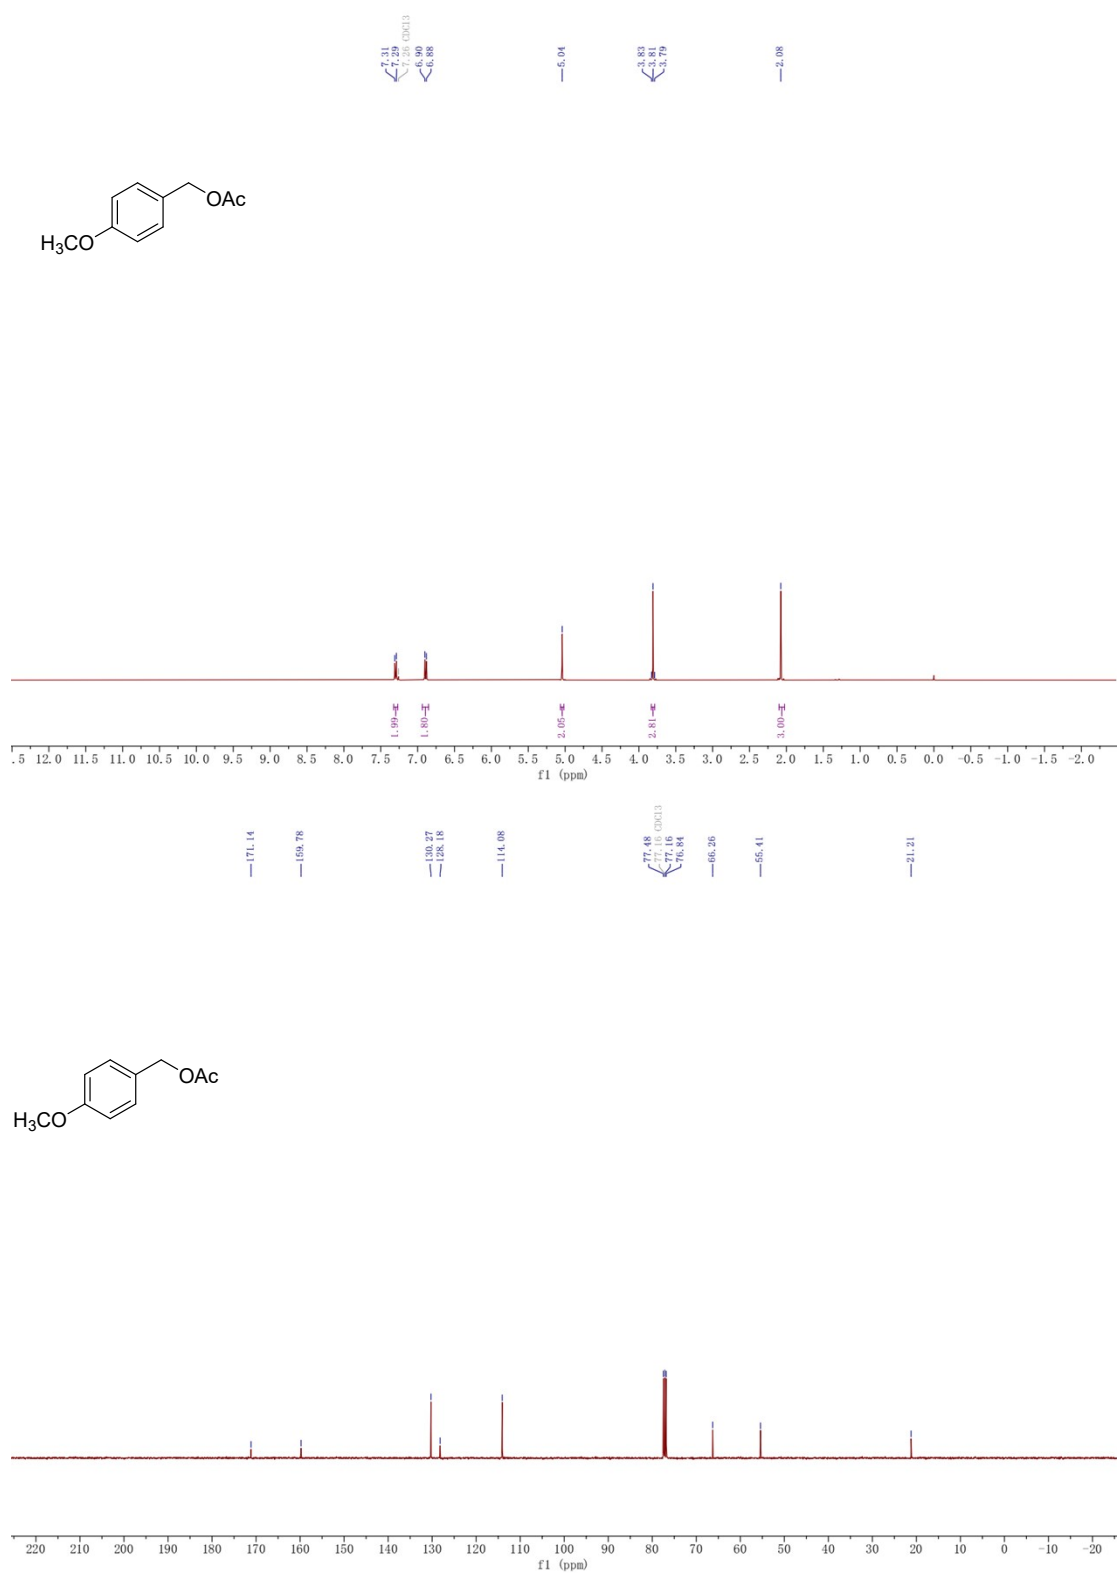

**Figure S3.** <sup>1</sup>H (top) and <sup>13</sup>C (bottom) NMR spectra of 4-methoxyphenyl acetate from (4-methoxyphenyl)methanol (table 3, entry 3).

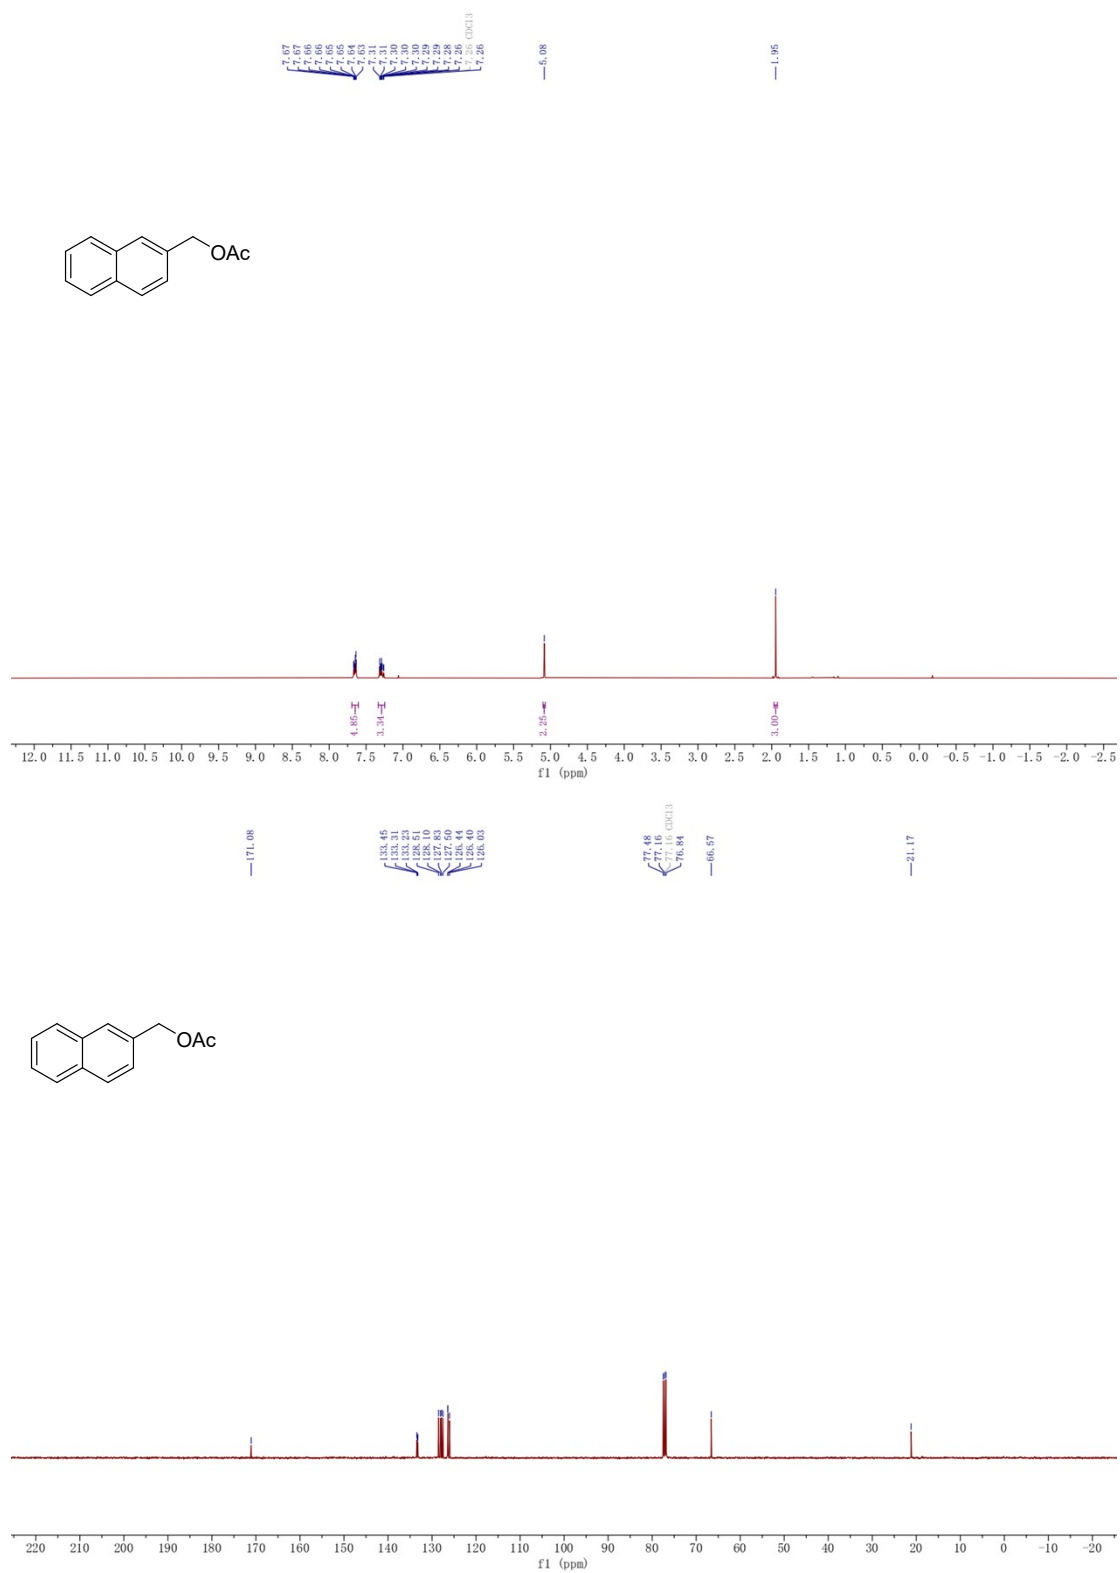

**Figure S4. <sup>1</sup>H (top) and <sup>13</sup>C (bottom) NMR spectra of naphthalen-2-ylmethyl acetate from naphthalen-2-ylmethanol (table 3, entry 4).**

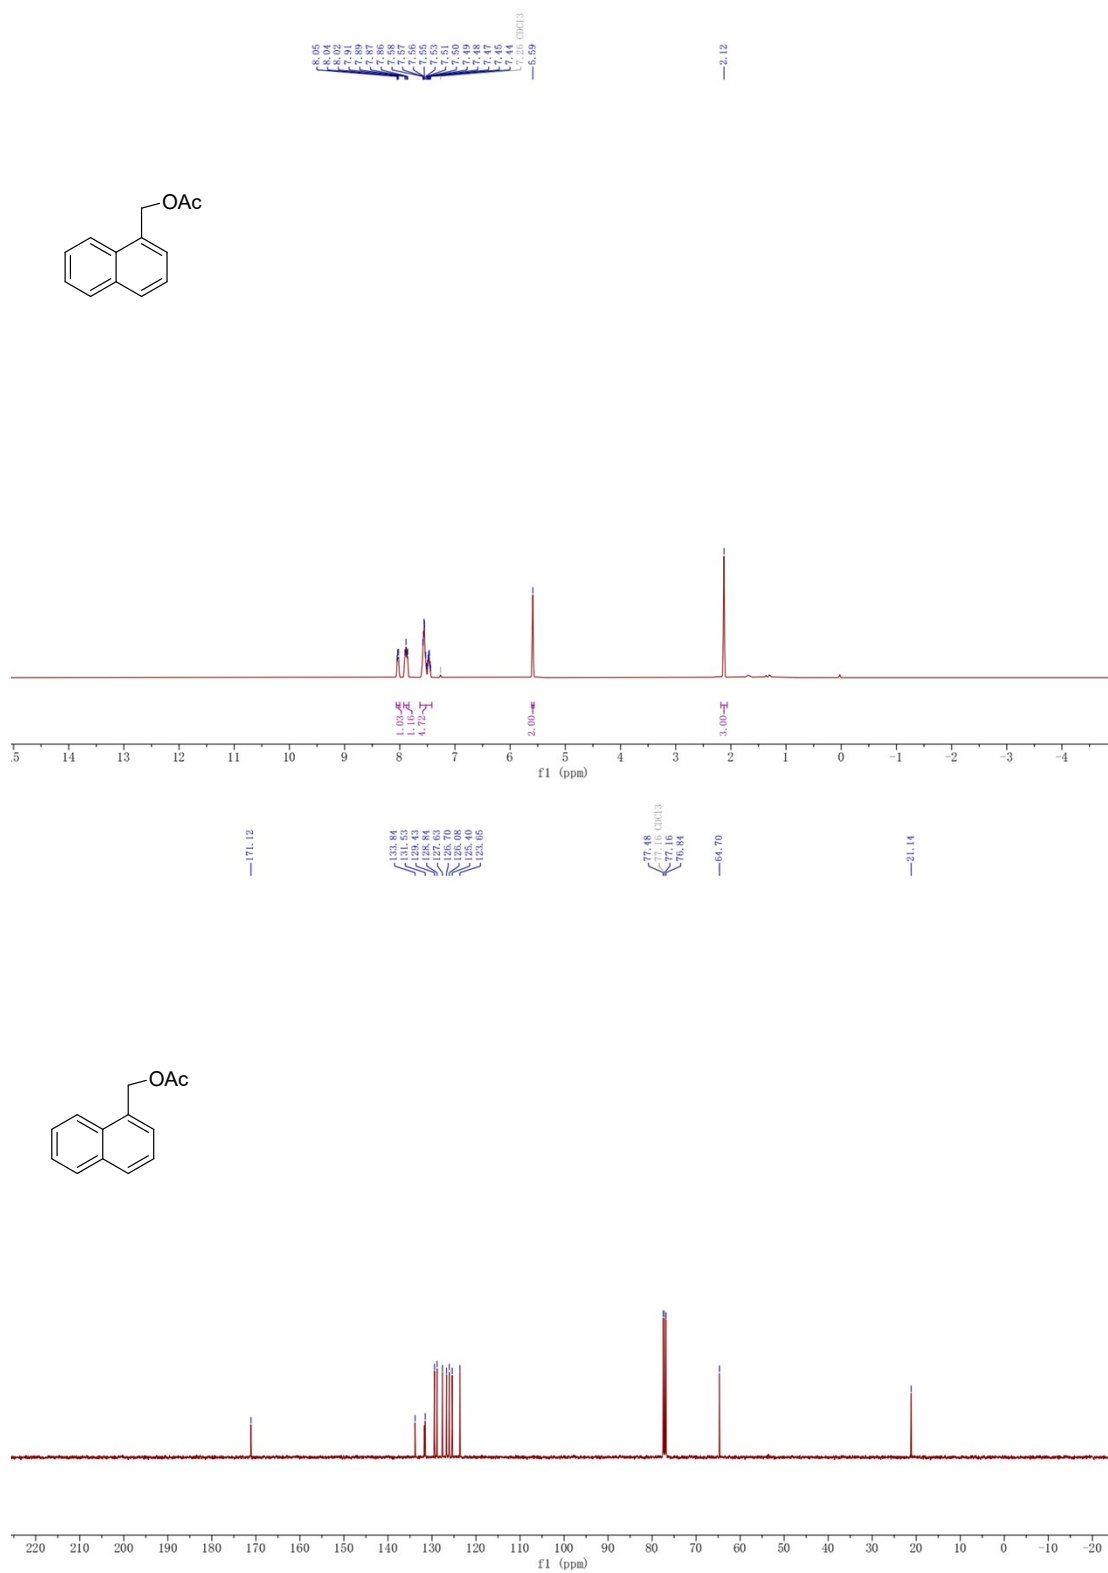

**Figure S5. <sup>1</sup>H (top) and <sup>13</sup>C (bottom) NMR spectra of naphthalen-1-ylmethyl acetate from naphthalen-1-ylmethanol (table 3, entry 5).**

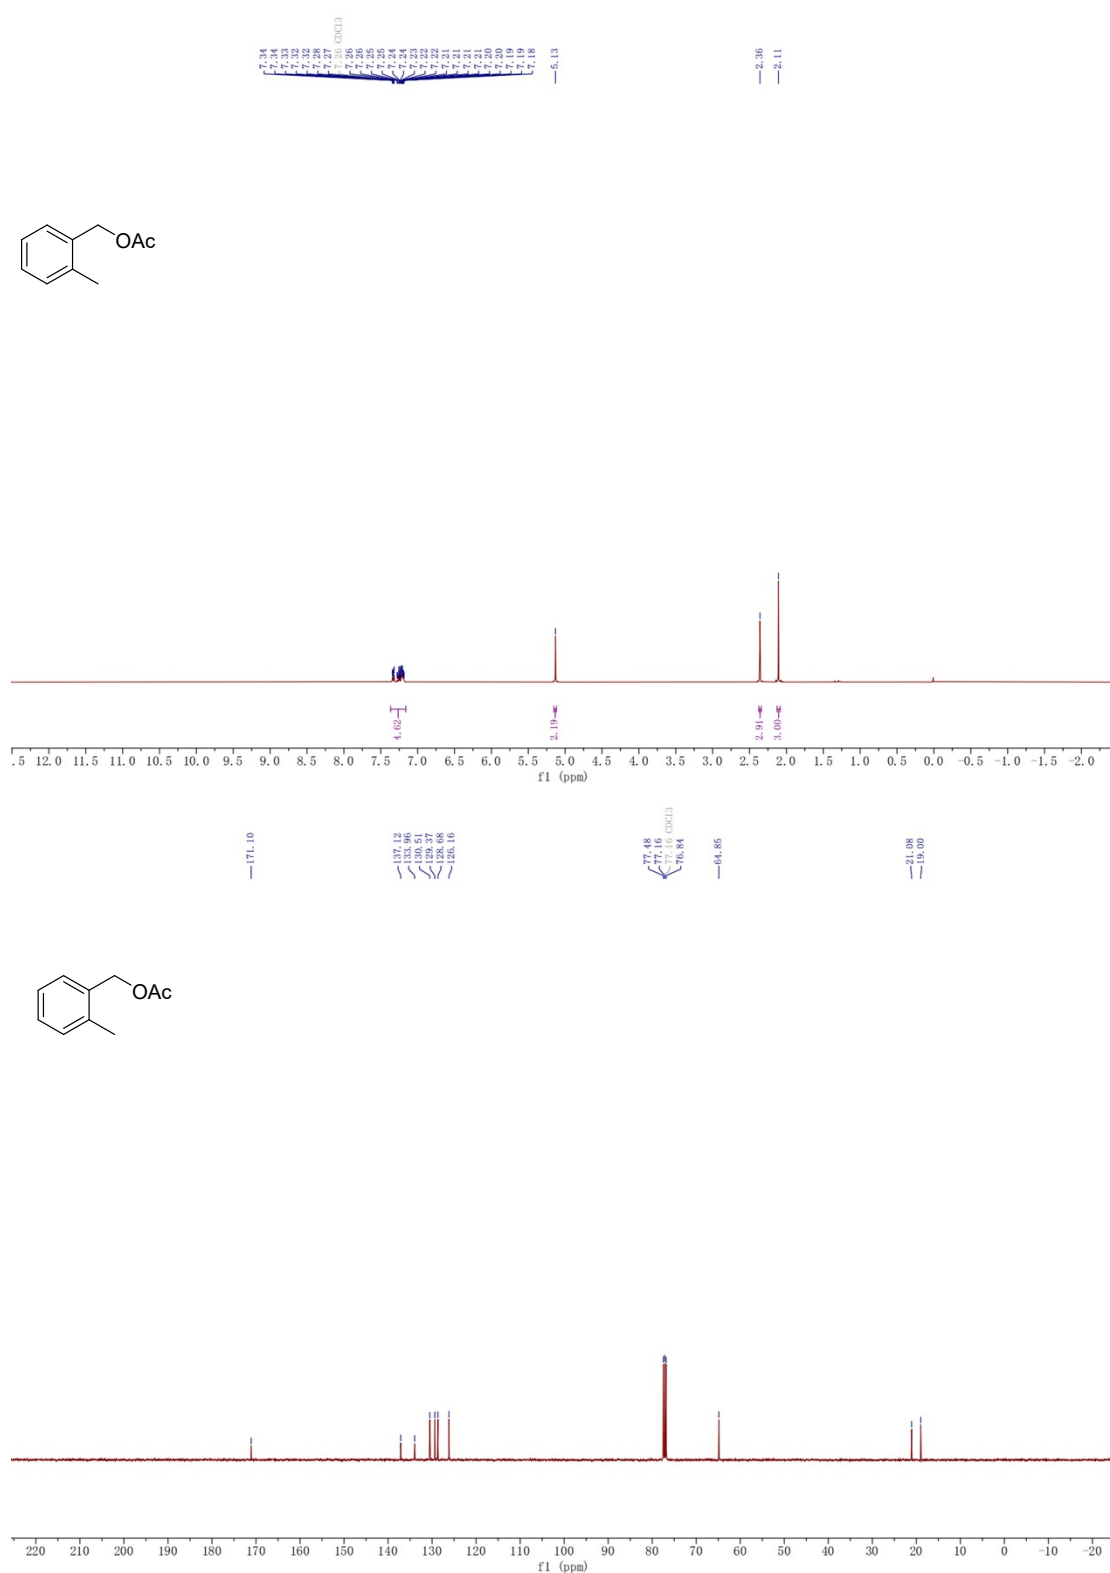

**Figure S6.** <sup>1</sup>H (top) and <sup>13</sup>C (bottom) NMR spectra of 2-methylbenzyl acetate from 2-methylbenzyl alcohol (table 3, entry 6).



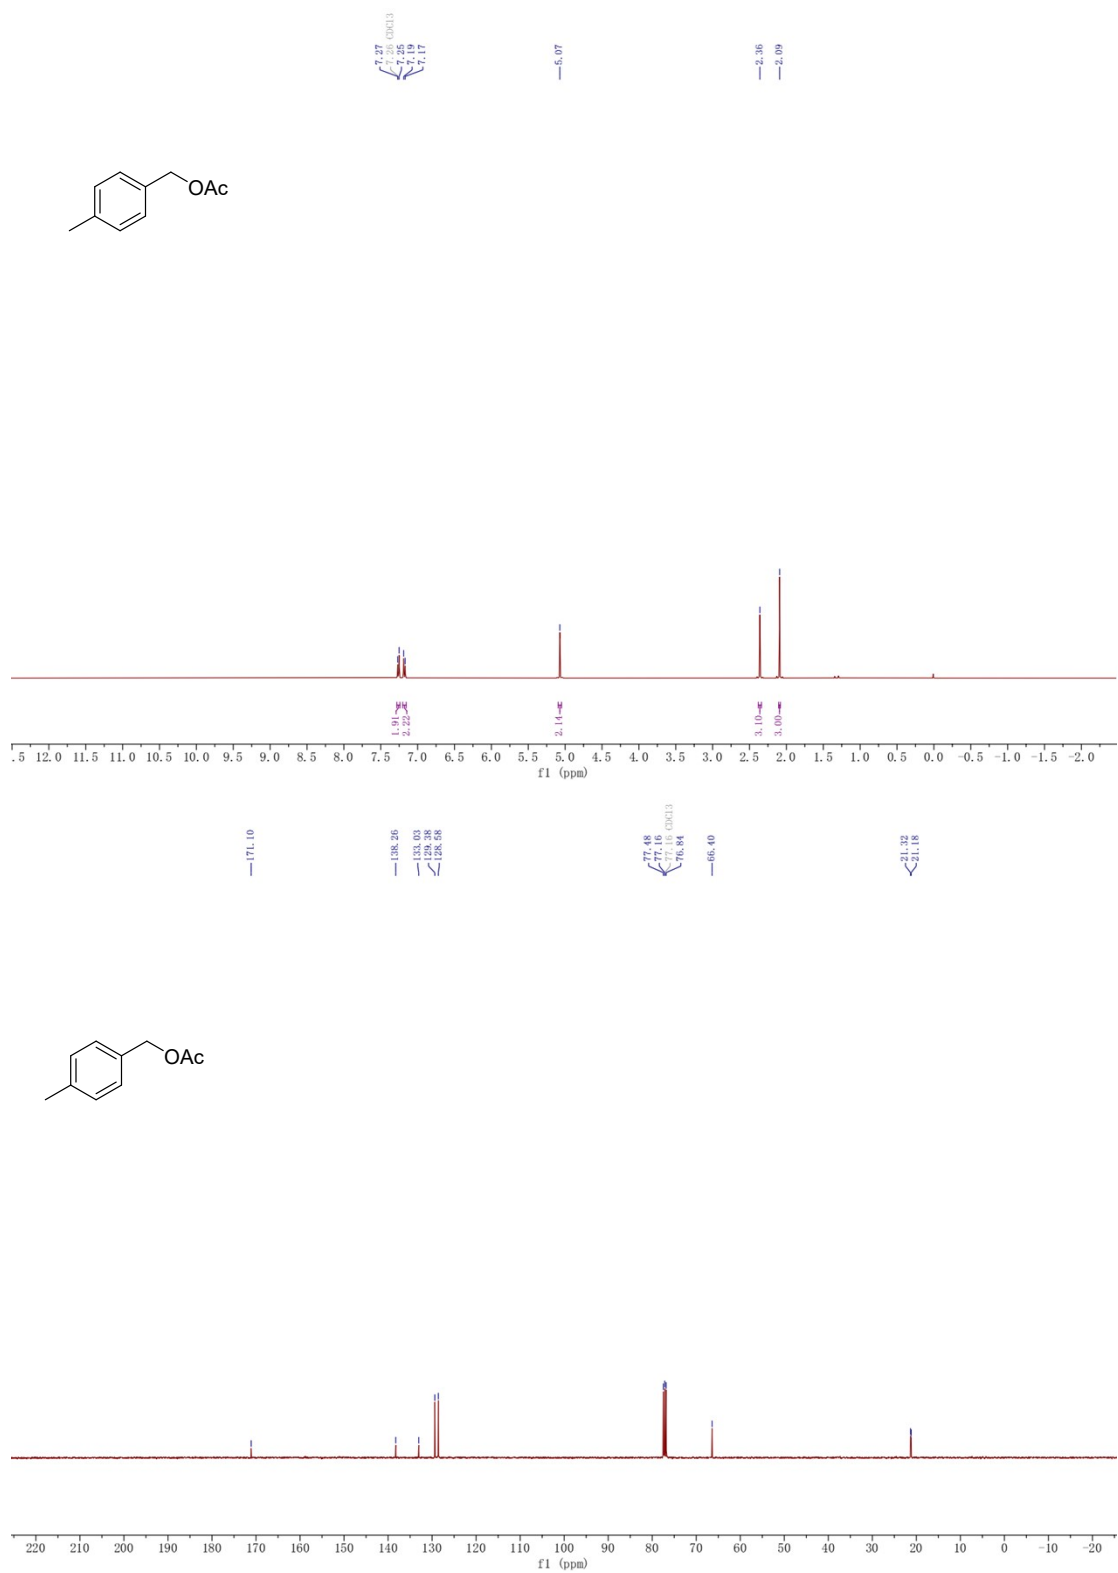

**Figure S7.** <sup>1</sup>H (top) and <sup>13</sup>C (bottom) NMR spectra of 4-methylbenzyl acetate from 4-methylbenzyl alcohol (table 3, entry 7).

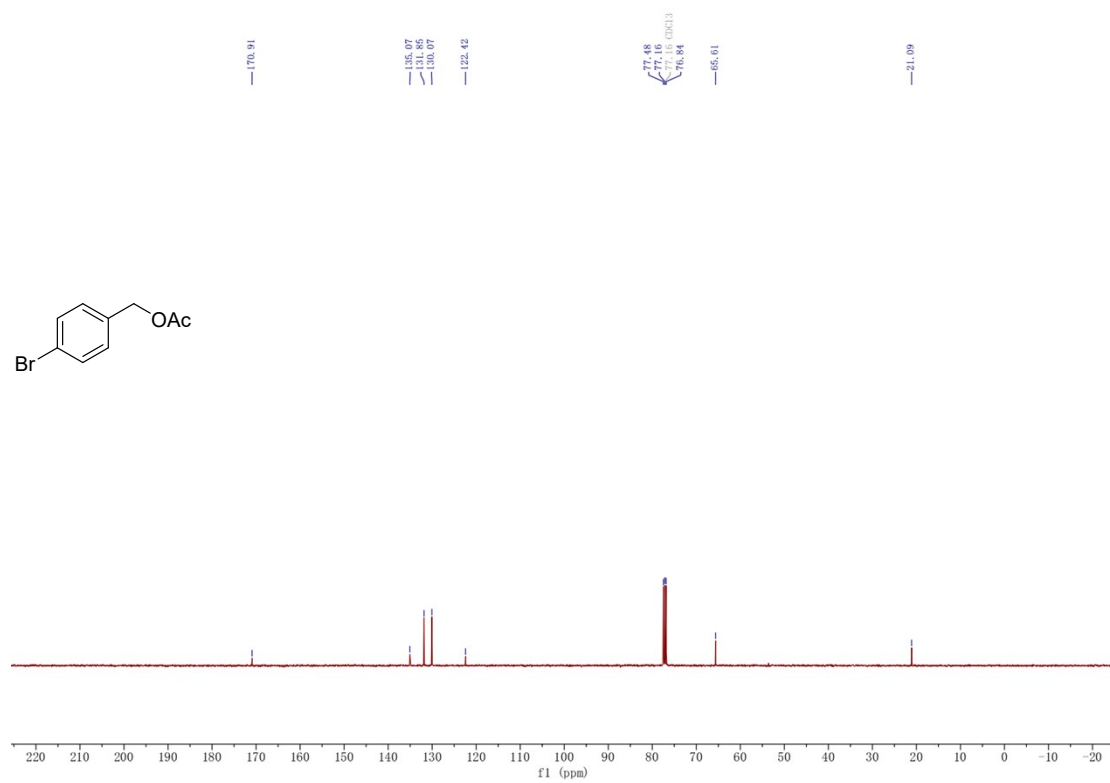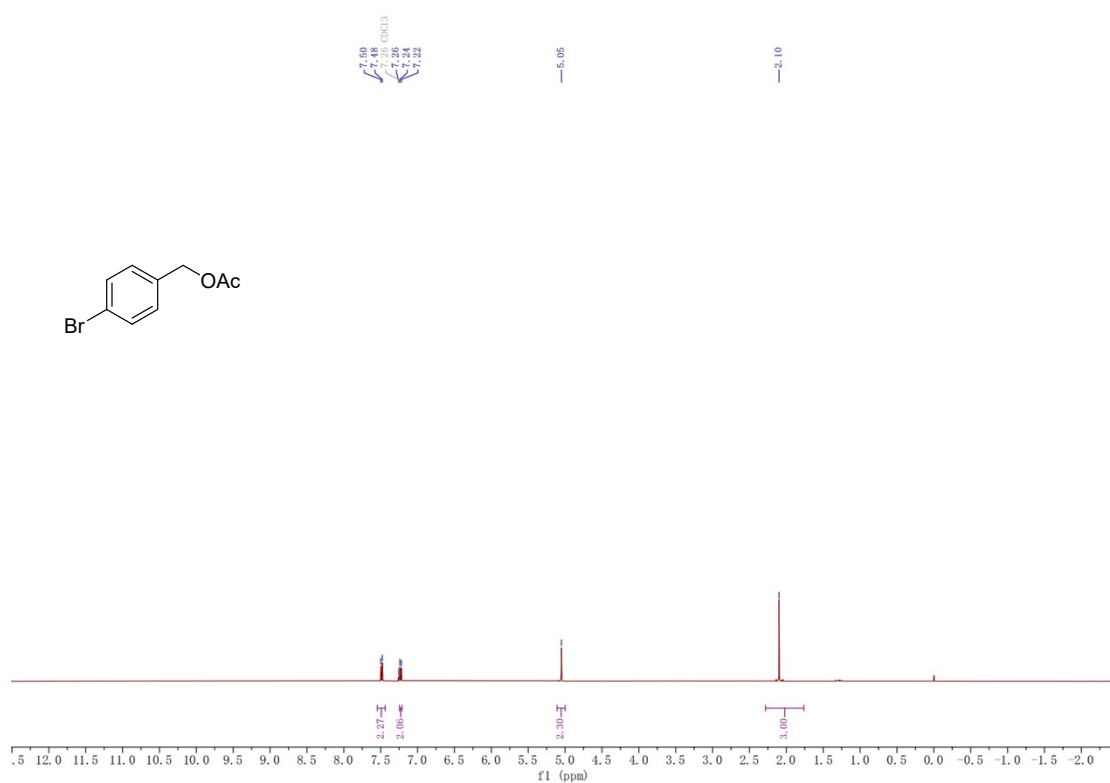

**Figure S8.**  $^1\text{H}$  (top) and  $^{13}\text{C}$  (bottom) NMR spectra of 4-bromobenzyl acetate from (4-bromophenyl)methanol (table 3, entry 8).

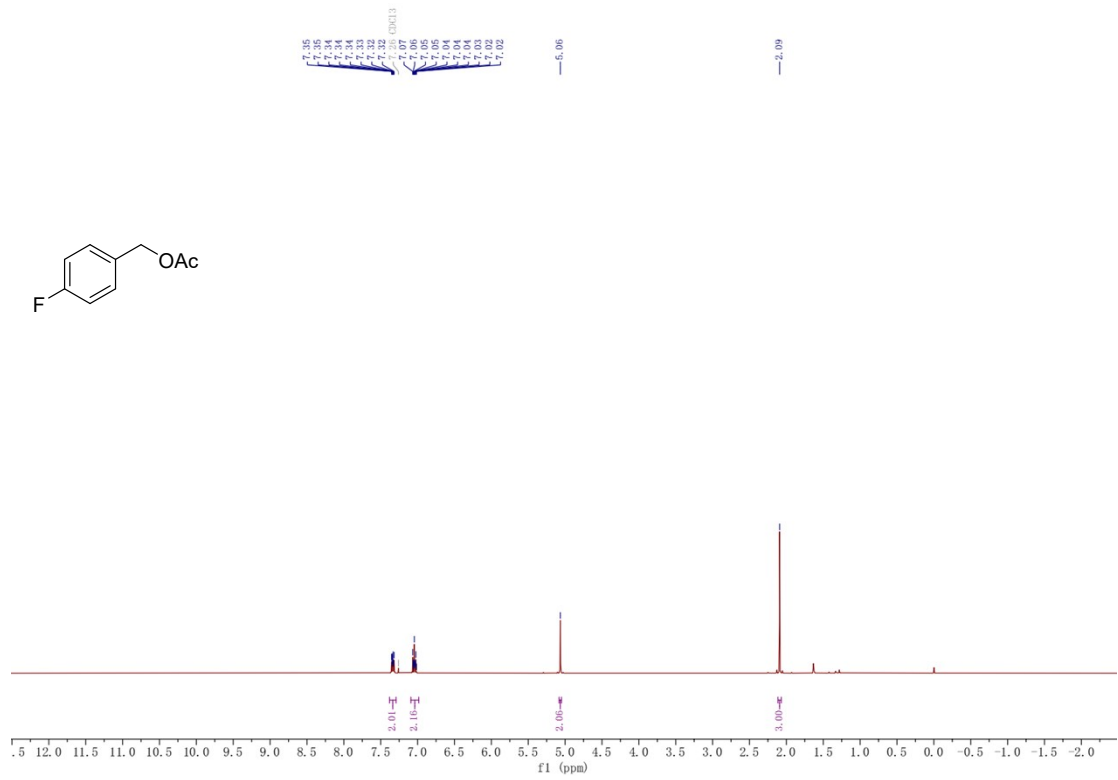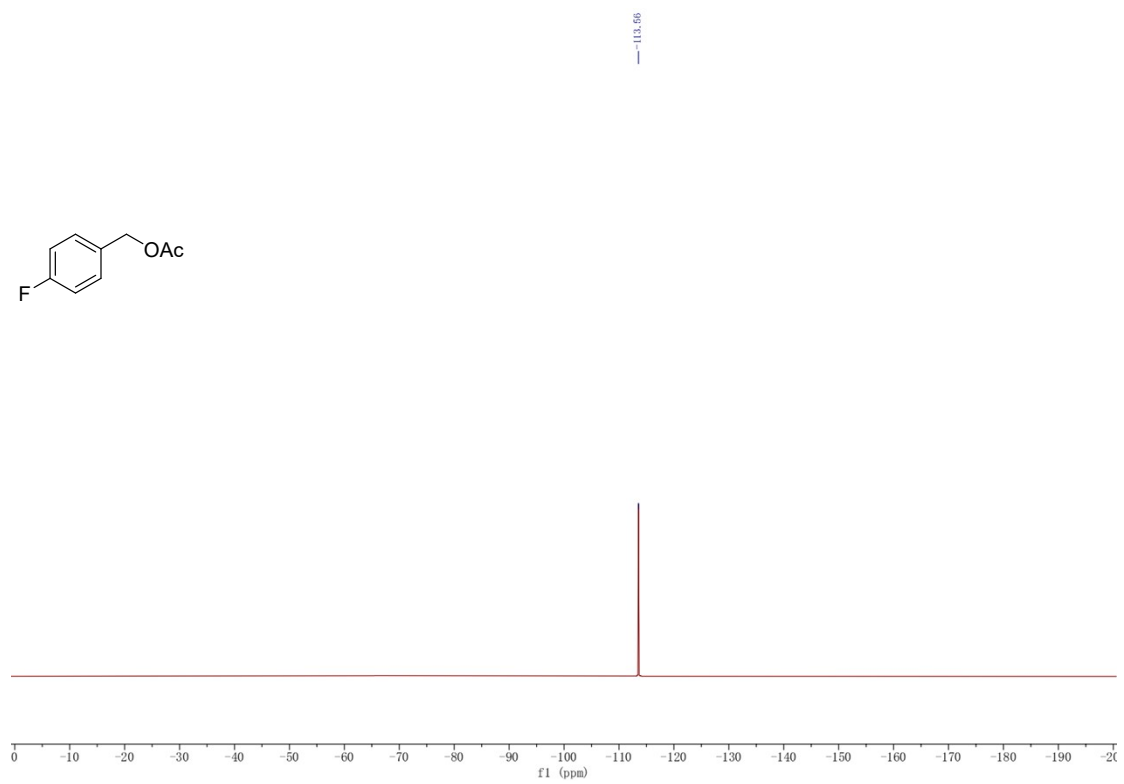

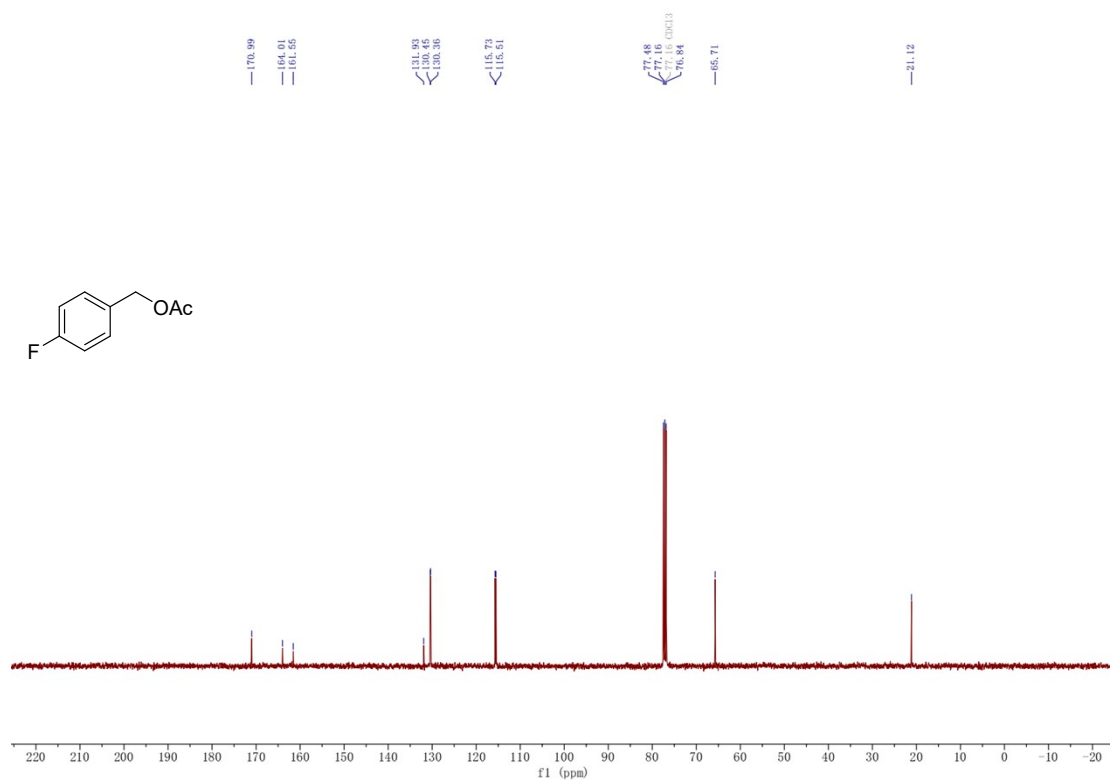

**Figure S9.** <sup>1</sup>H (top) , <sup>19</sup>F(middle) and <sup>13</sup>C (bottom) NMR spectra of 4-fluorobenzyl acetate from (4-fluorophenyl)methanol(table 3, entry 9).

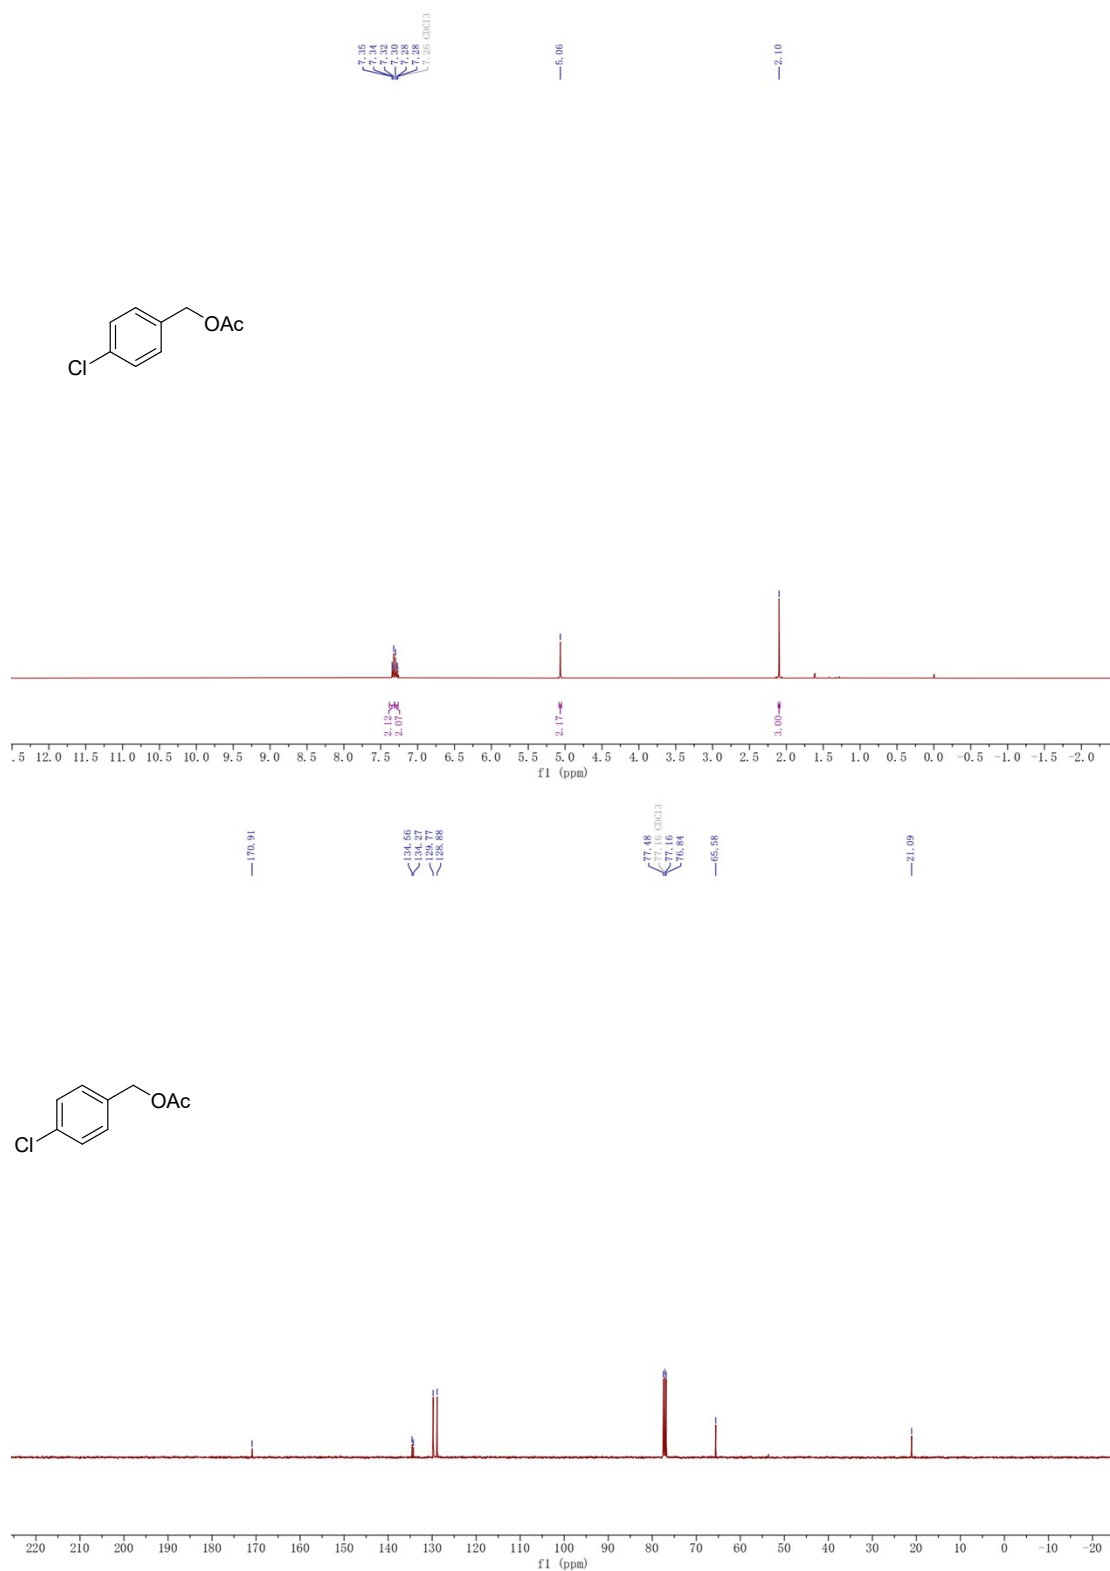

**Figure S10. <sup>1</sup>H (top) and <sup>13</sup>C (bottom) NMR spectra of 4-chlorobenzyl acetate from (4-chlorophenyl)methanol (table 3, entry 10).**

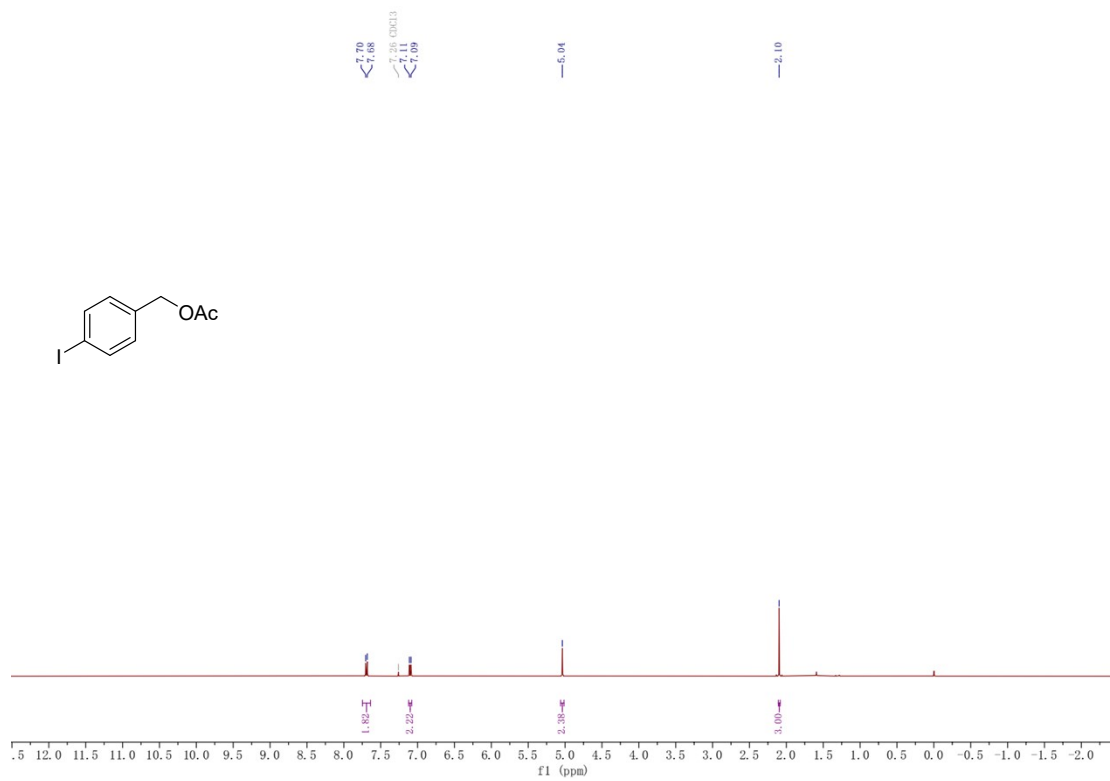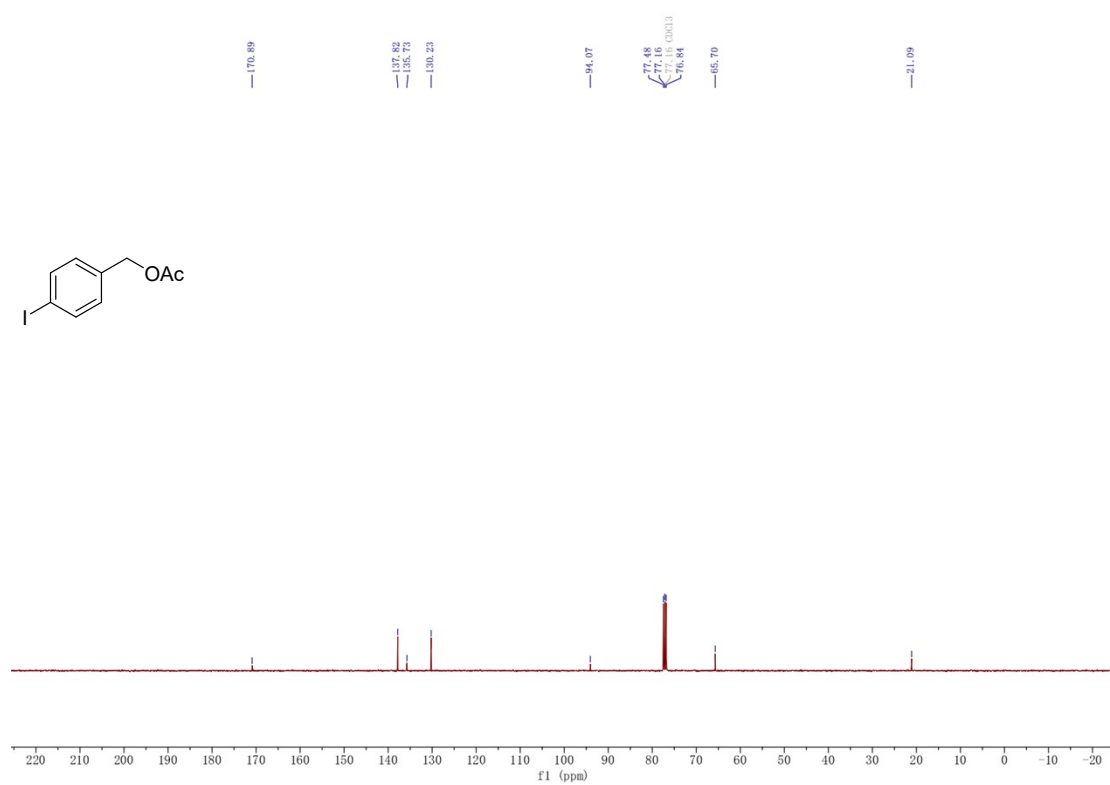

**Figure S11.**  $^1\text{H}$  (top) and  $^{13}\text{C}$  (bottom) NMR spectra of 4-iodobenzyl acetate from (4-iodophenyl)methanol (table 3, entry 11).

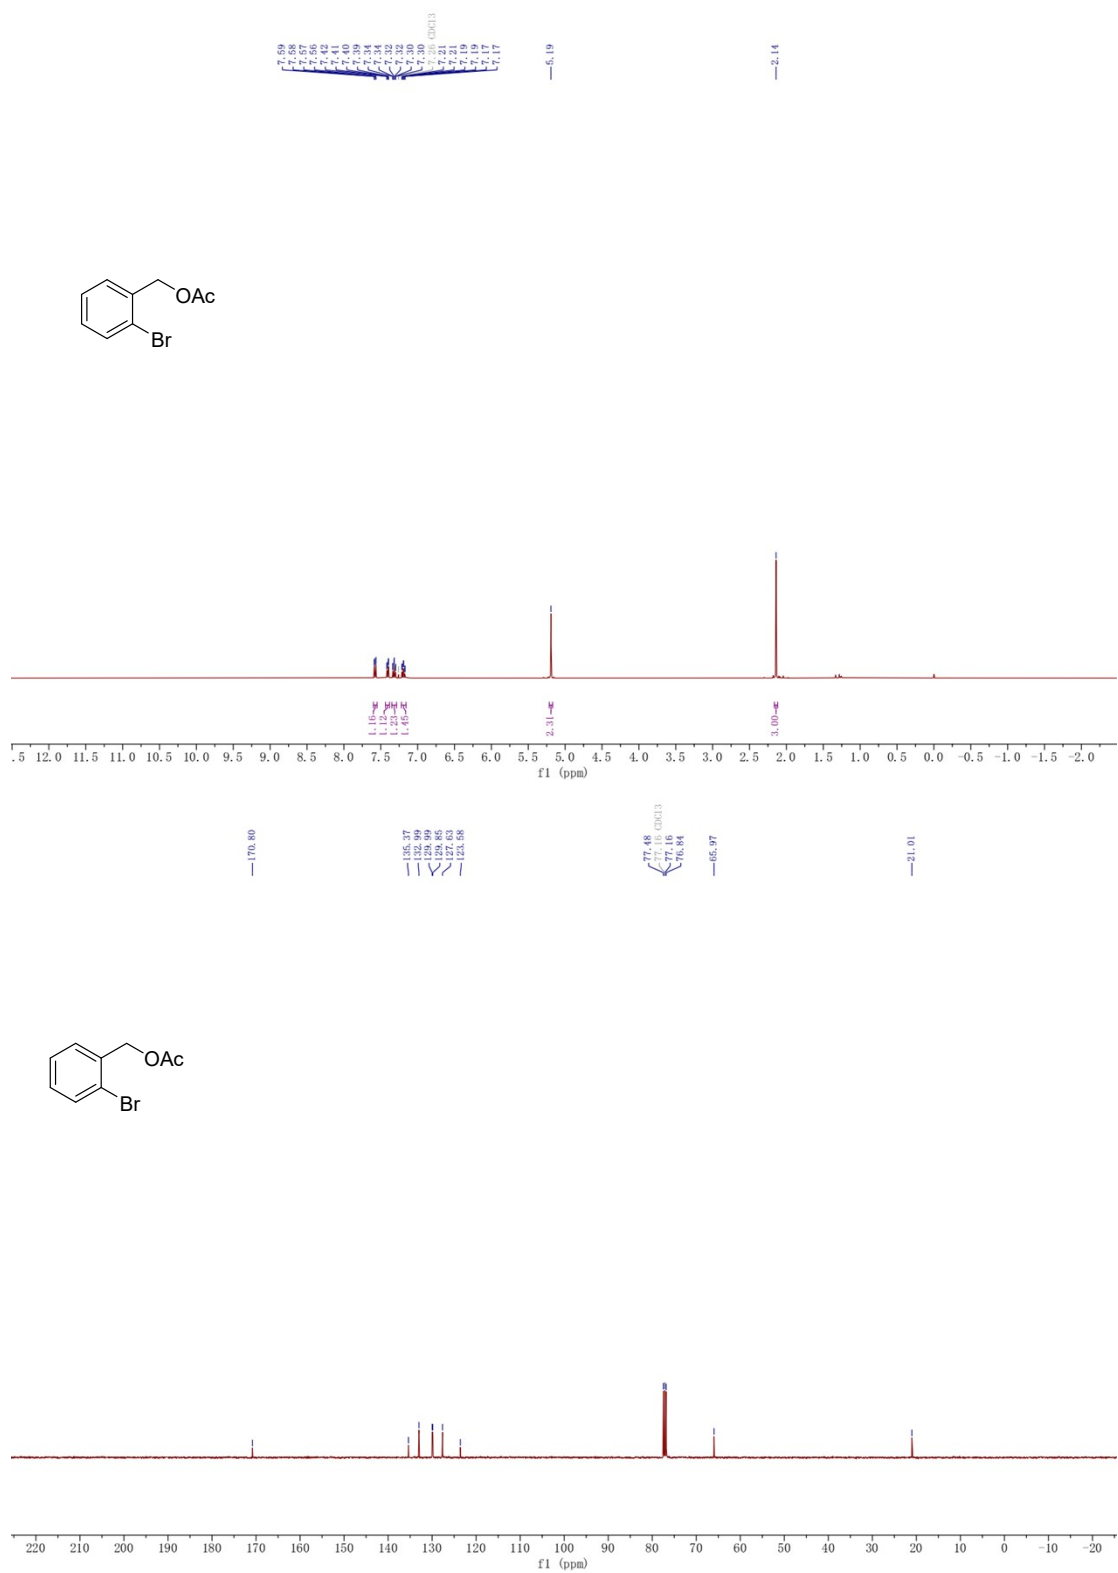

**Figure S12.** <sup>1</sup>H (top) and <sup>13</sup>C (bottom) NMR spectra of 2-bromobenzyl acetate from (2-bromophenyl)methanol (table 3, entry 12).

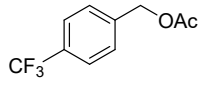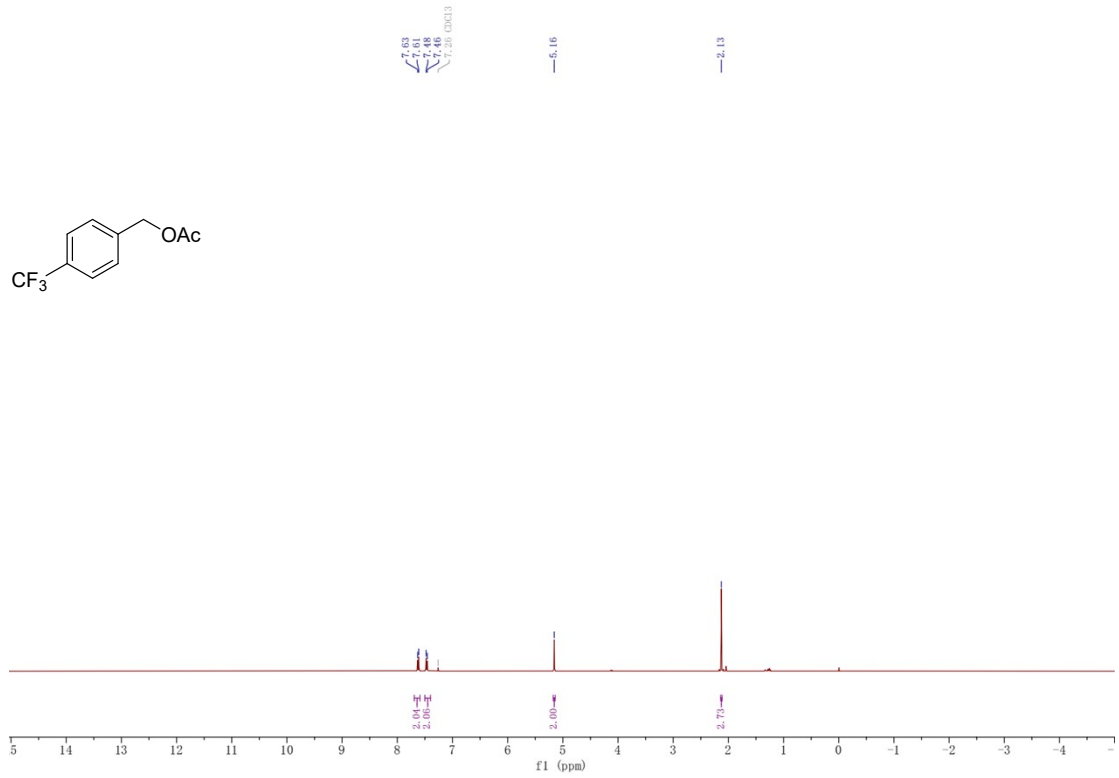

W-1-13

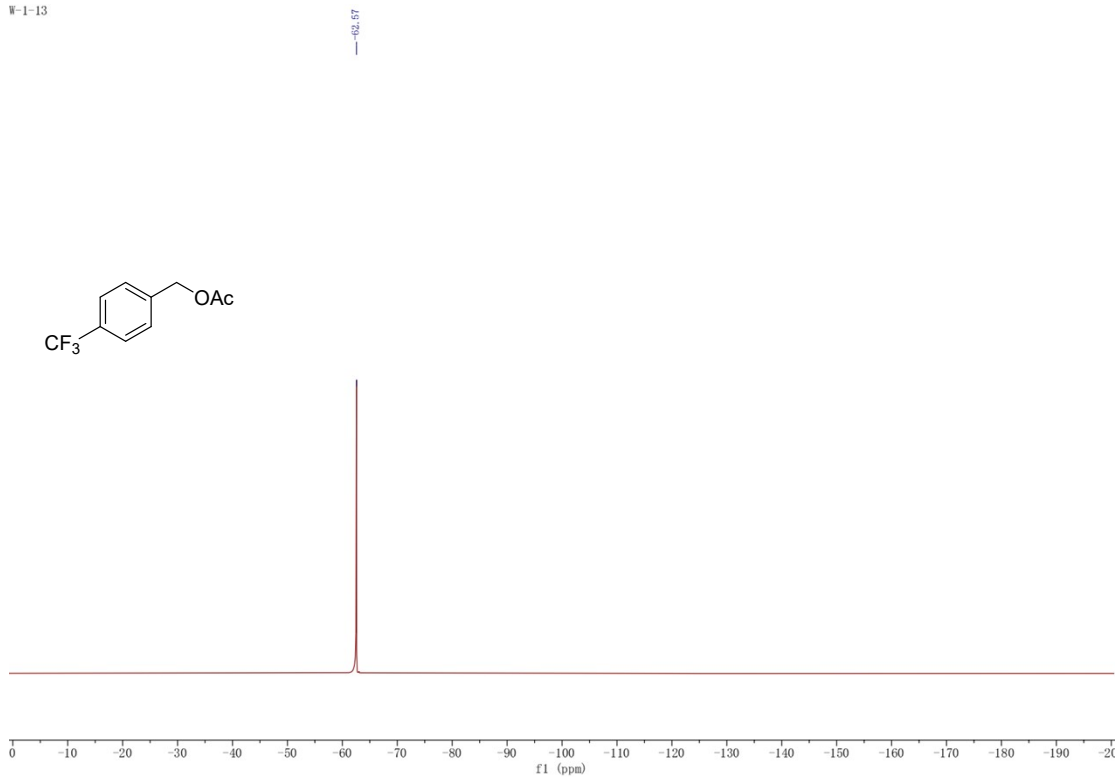



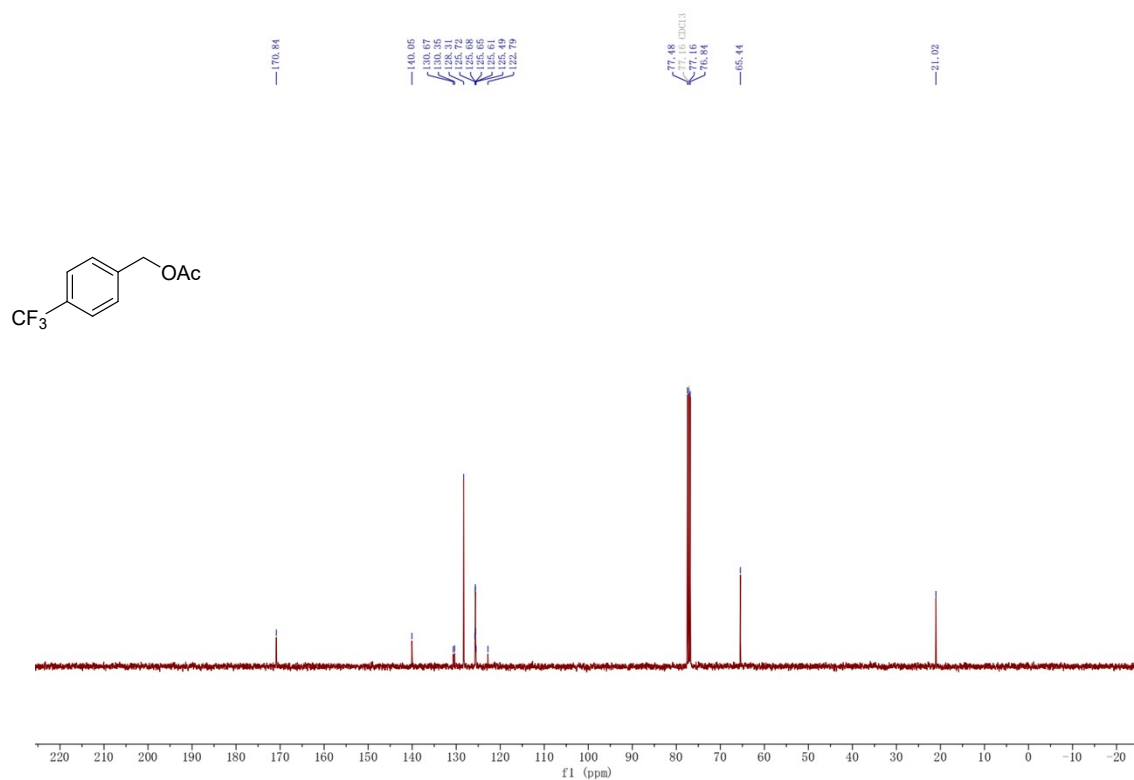

**Figure S13.** <sup>1</sup>H (top) , <sup>19</sup>F(middle) and <sup>13</sup>C (bottom) NMR spectra of 4-(trifluoromethyl)benzyl acetate from (4-(trifluoromethyl)phenyl)methanol(table 3, entry 13).

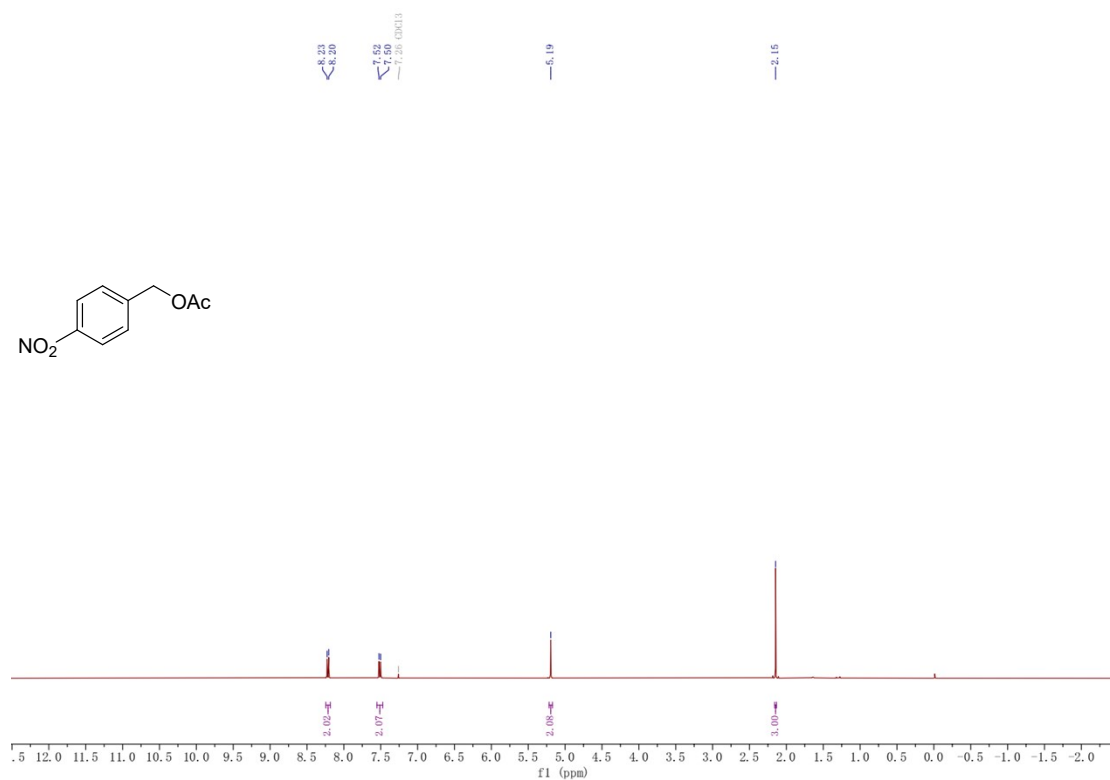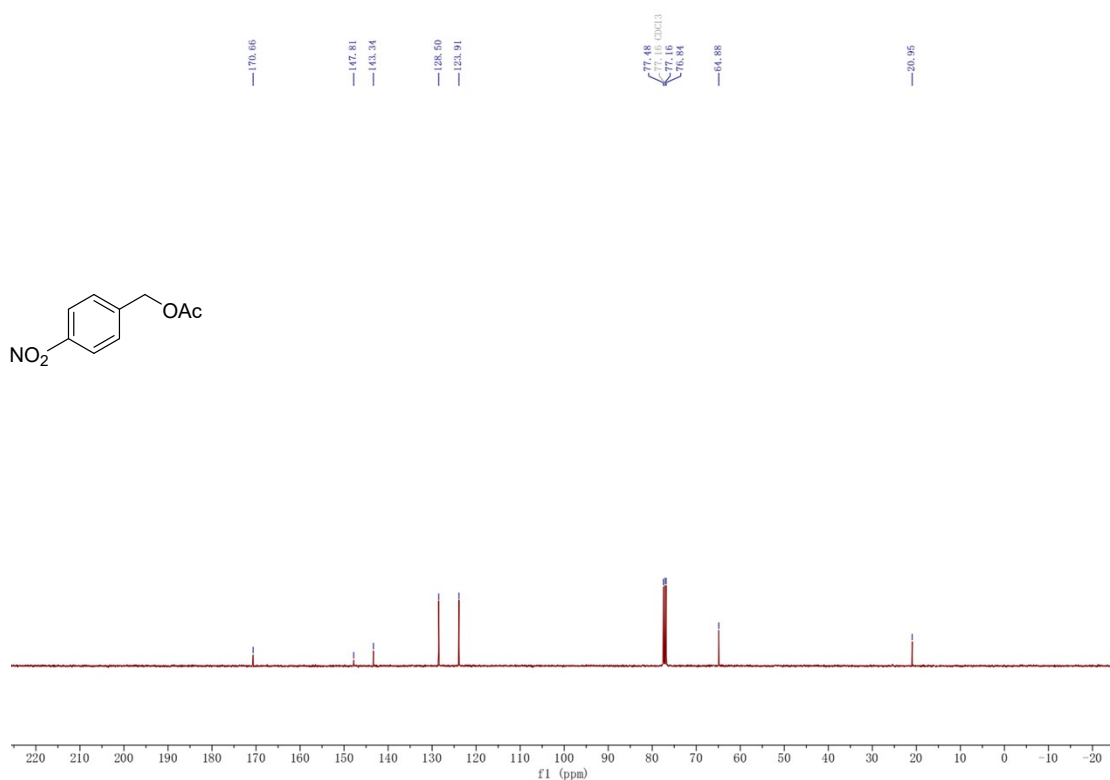

**Figure S14.** <sup>1</sup>H (top) and <sup>13</sup>C (bottom) NMR spectra of 4-nitrobenzyl acetate from (4-nitrophenyl)methanol (table 3, entry 14).

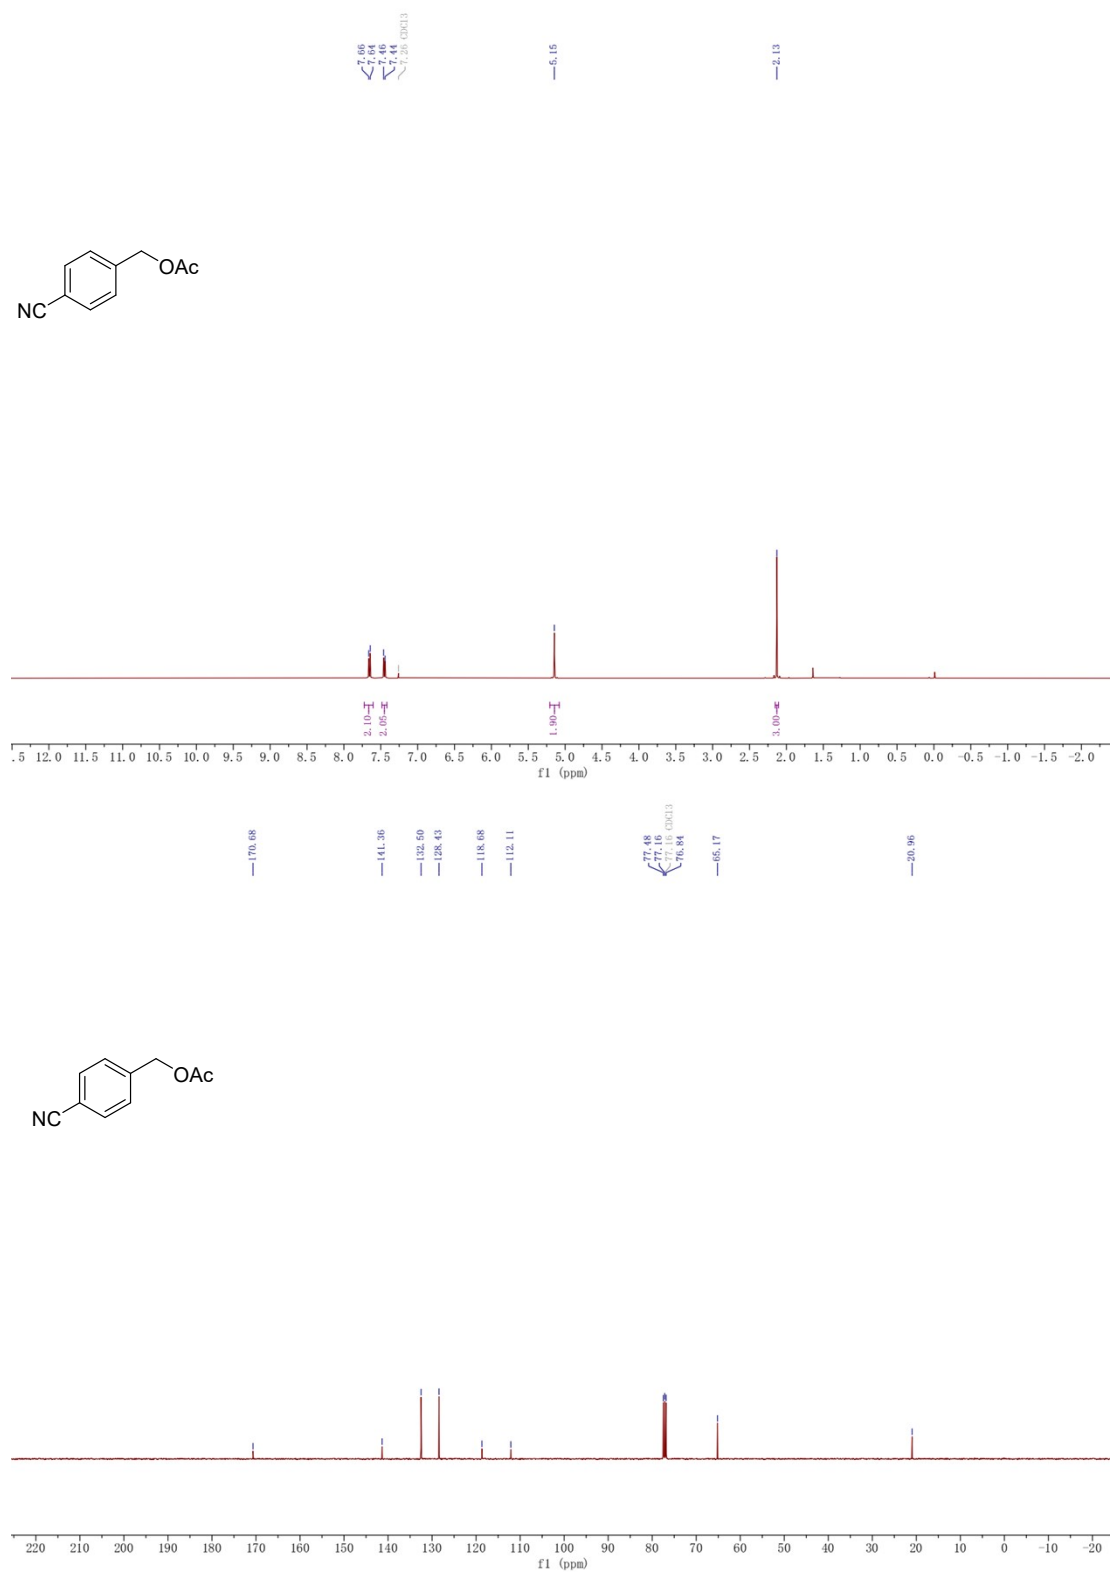

**Figure S15.** <sup>1</sup>H (top) and <sup>13</sup>C (bottom) NMR spectra of 4-cyanobenzyl acetate from 4-(hydroxymethyl)benzonitrile (table 3, entry 15).

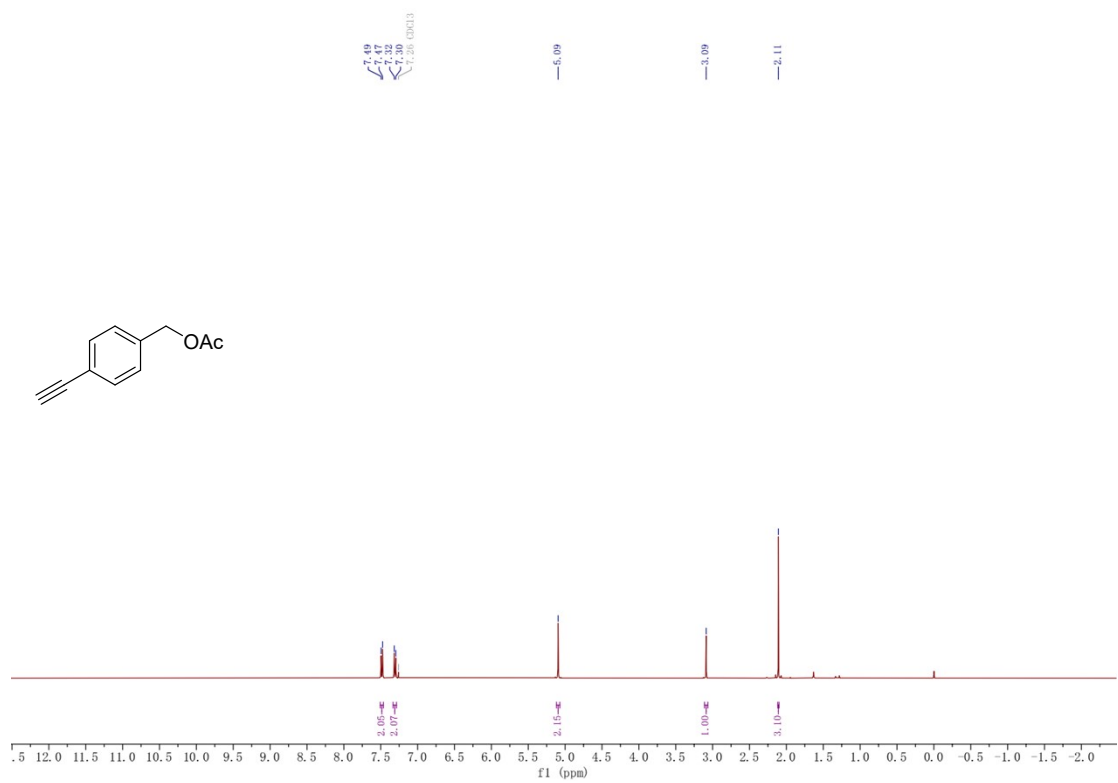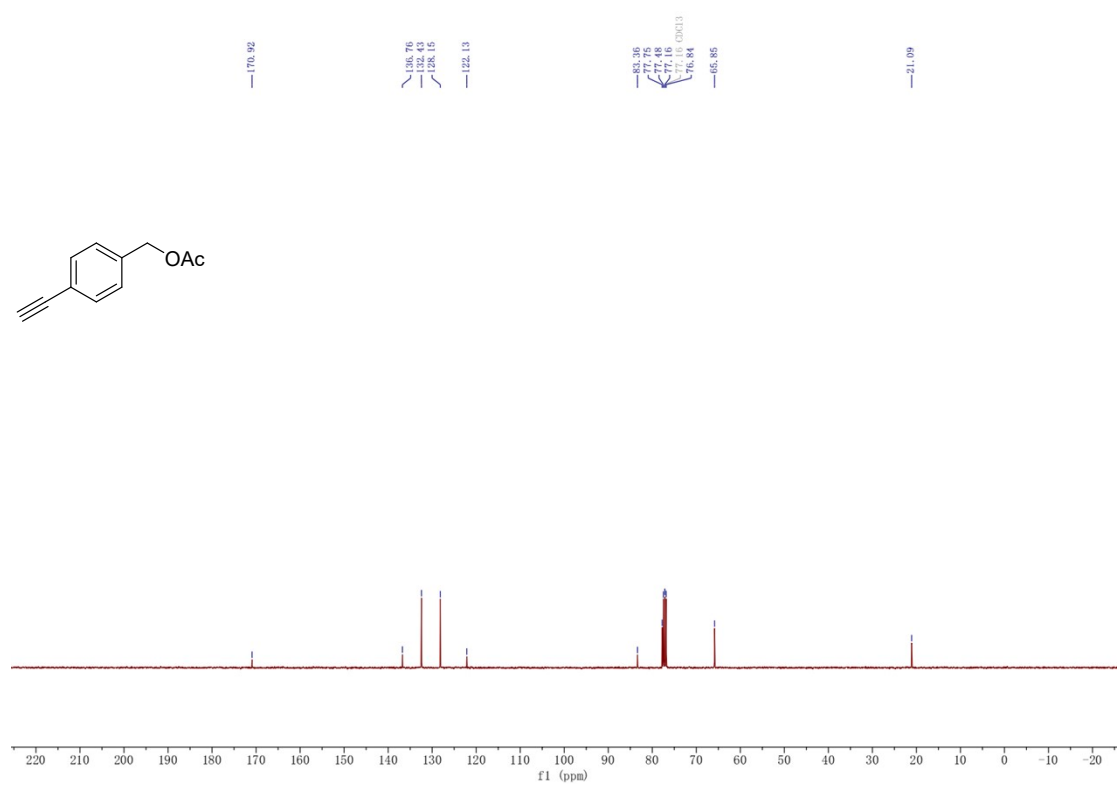

Figure S16. <sup>1</sup>H (top) and <sup>13</sup>C (bottom) NMR spectra of 4-ethynylbenzyl acetate from (4-ethynylphenyl)methanol (table 3, entry 16).

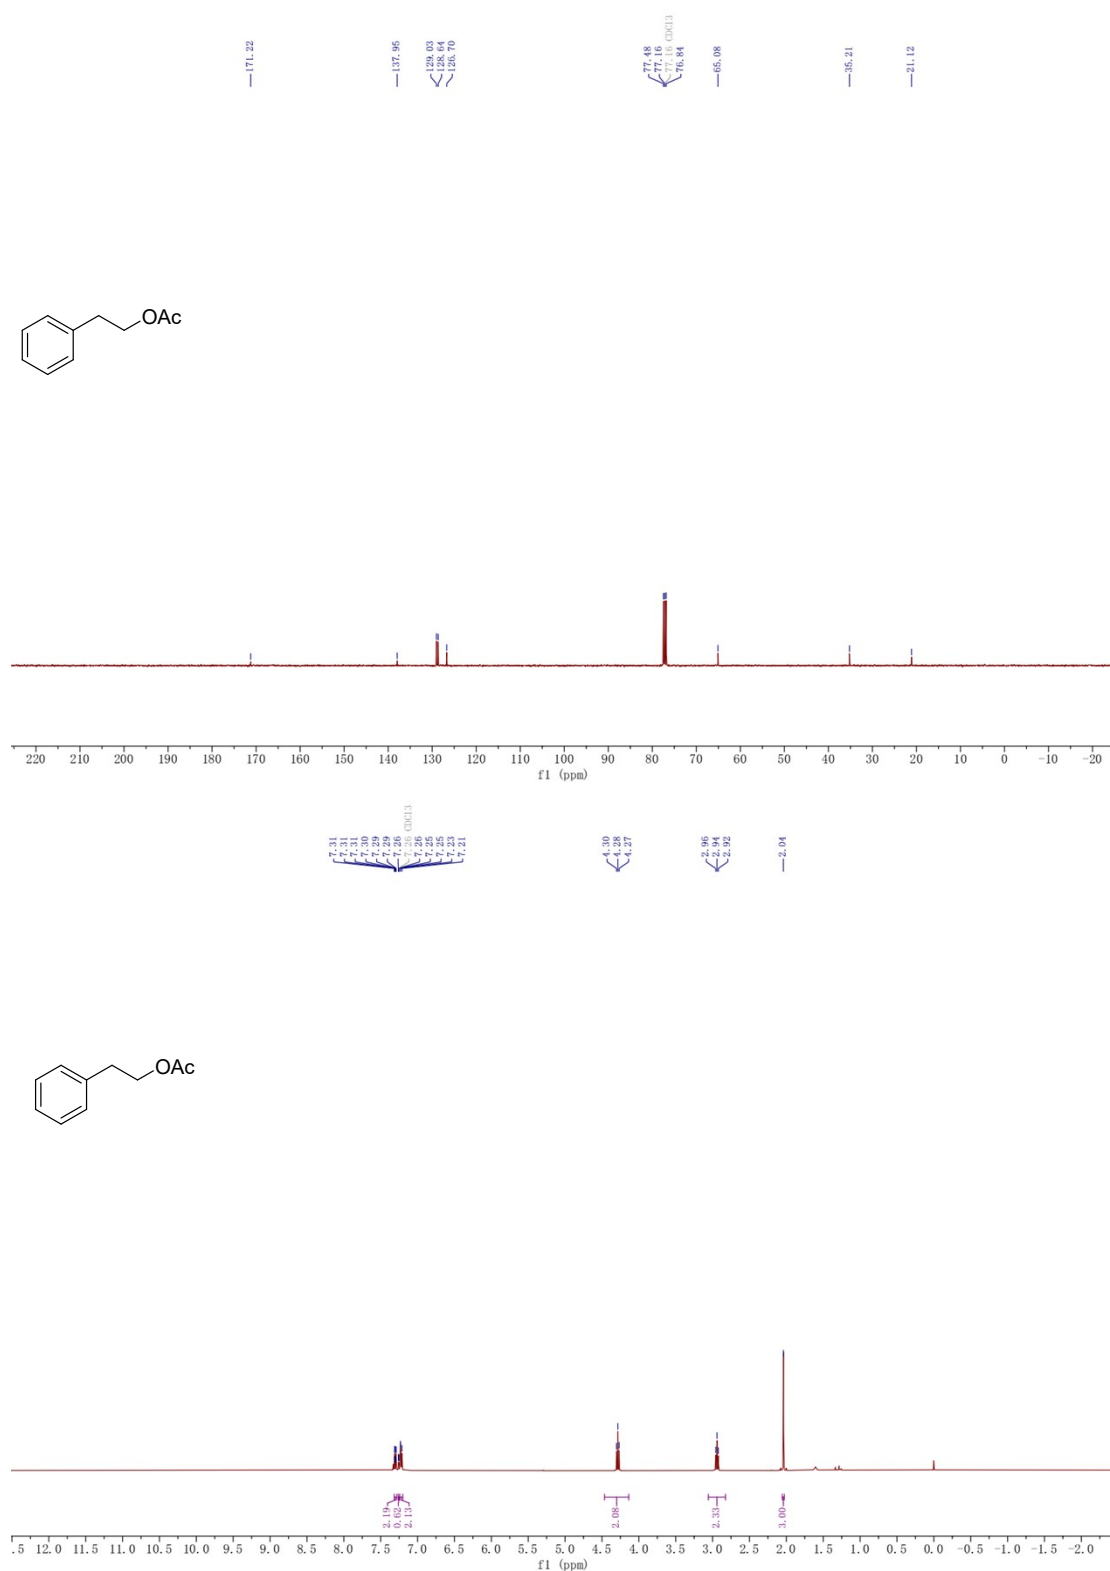

**Figure S17.**  $^1\text{H}$  (top) and  $^{13}\text{C}$  (bottom) NMR spectra of phenethyl acetate from 2-phenylethan-1-ol (table 3, entry 17).

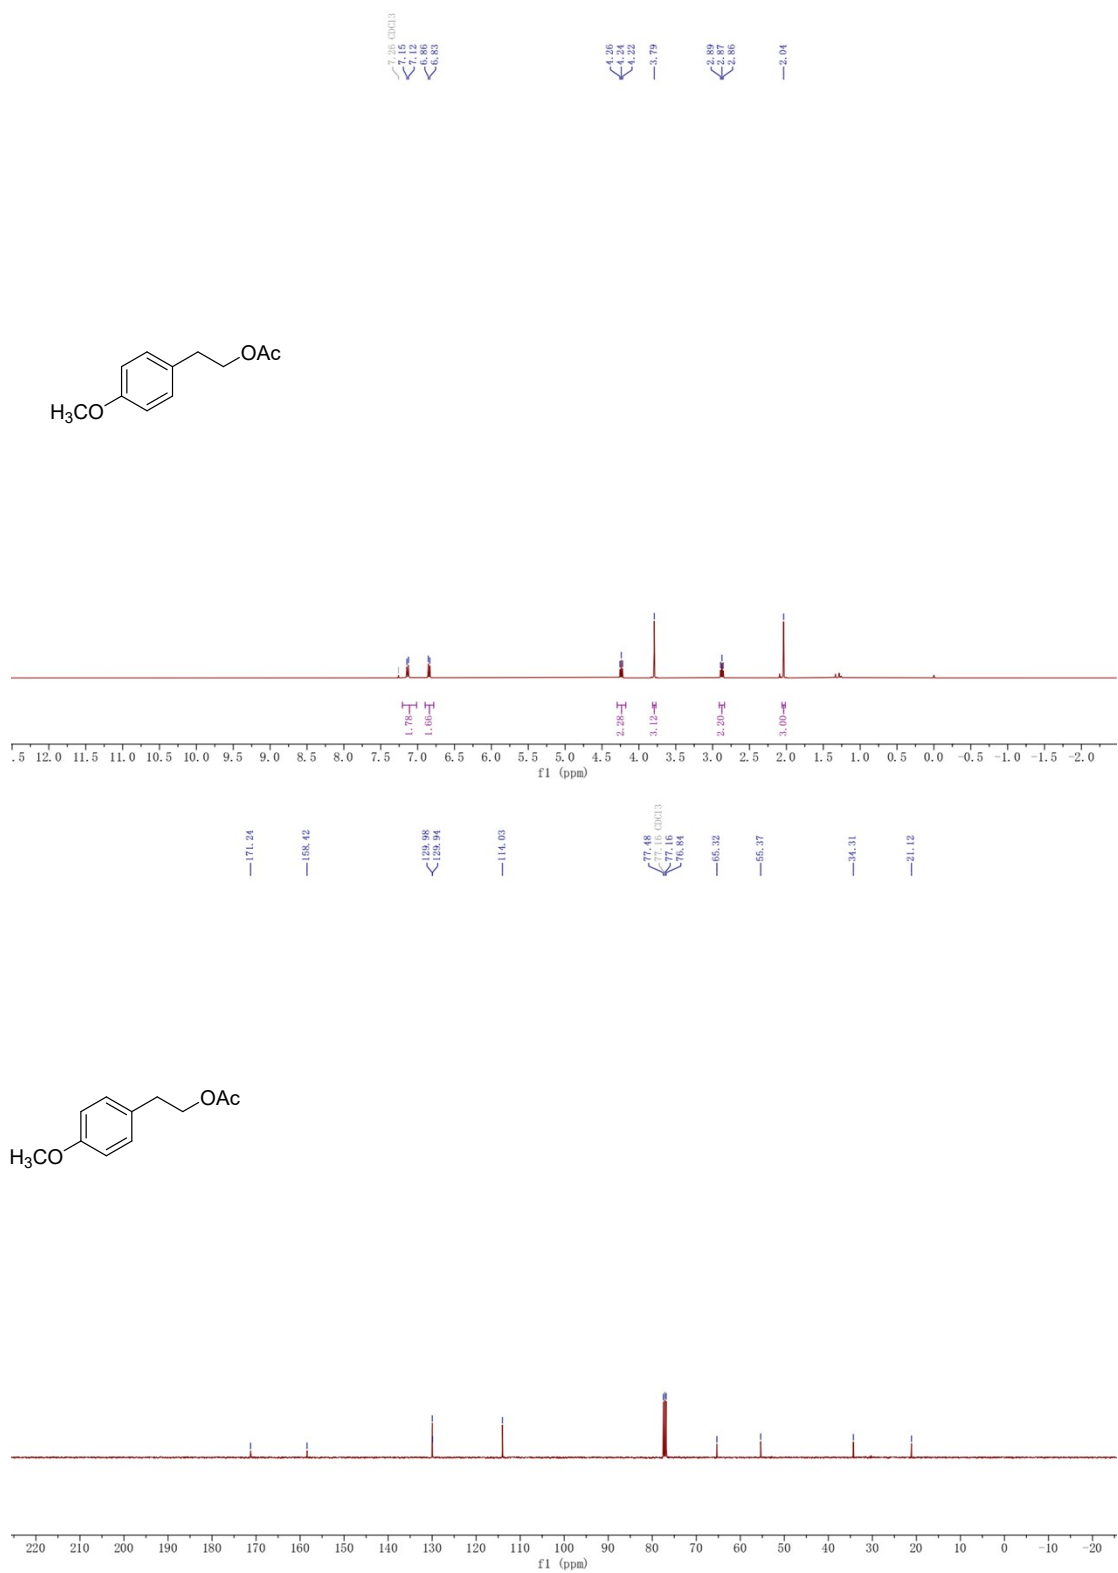

**Figure S18.** <sup>1</sup>H (top) and <sup>13</sup>C (bottom) NMR spectra of 4-methoxyphenethyl acetate from 2-(4-methoxyphenyl)ethan-1-ol (table 3, entry 18).

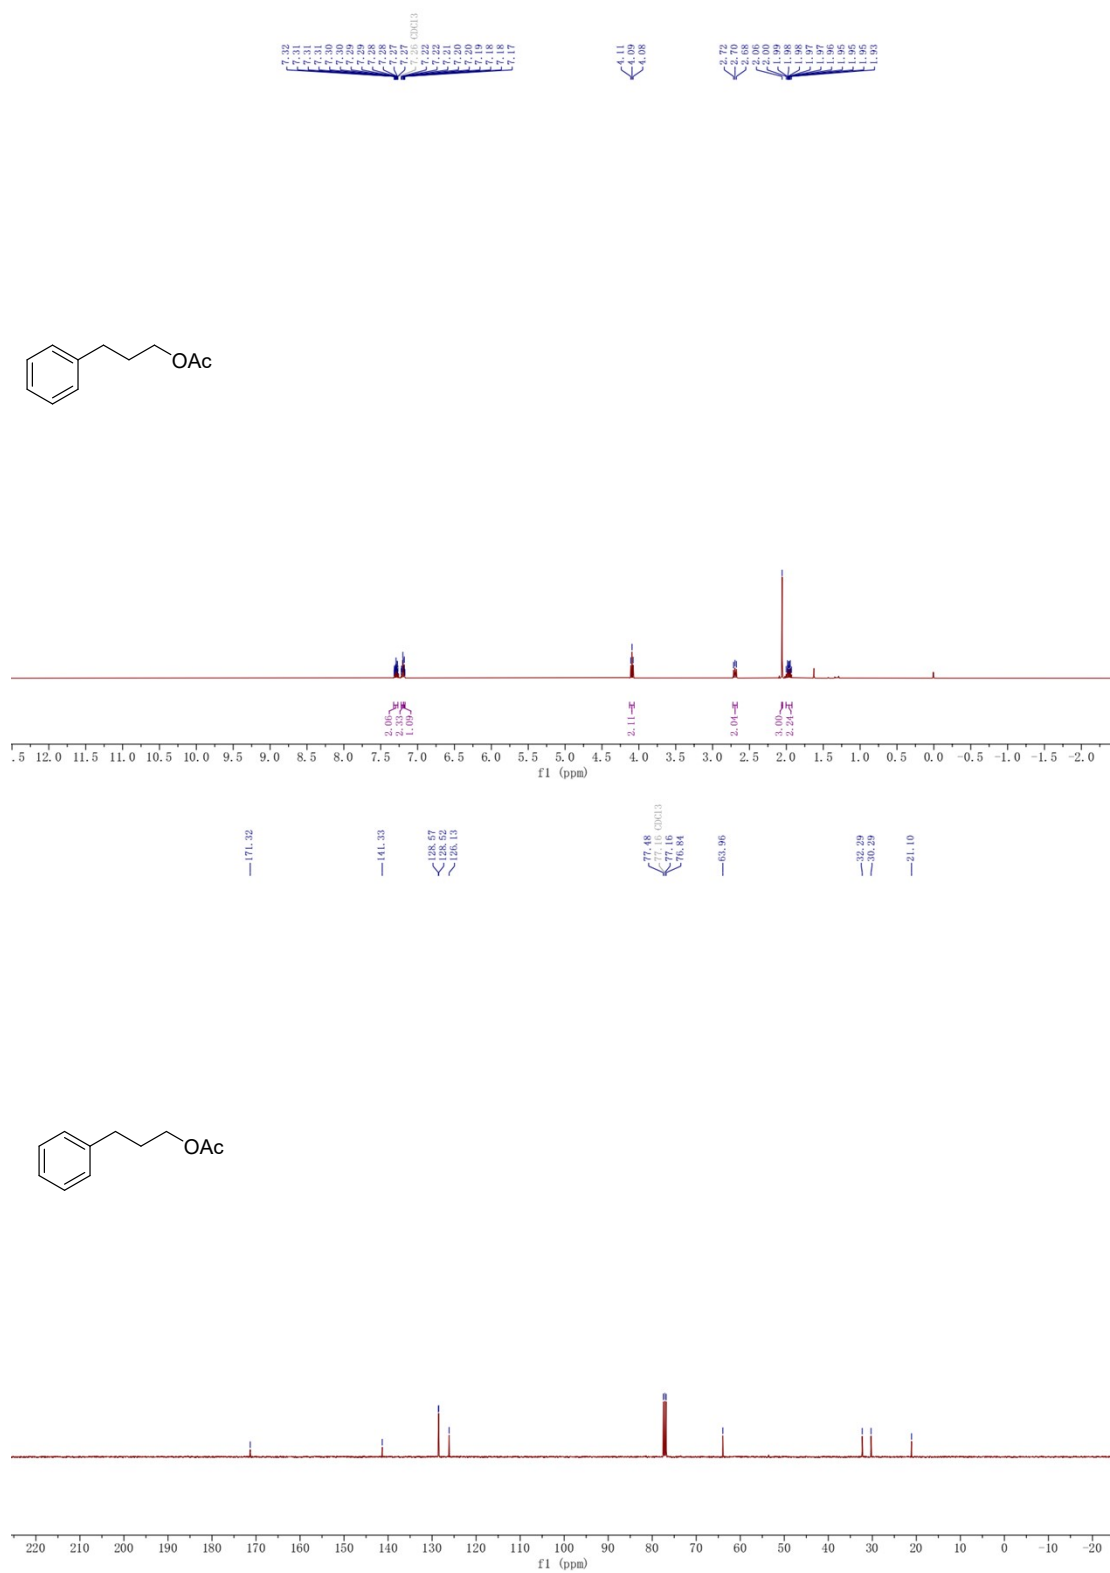

**Figure S19.** <sup>1</sup>H (top) and <sup>13</sup>C (bottom) NMR spectra of 3-phenylpropyl acetate from 3-phenylpropan-1-ol (table 3, entry 19).

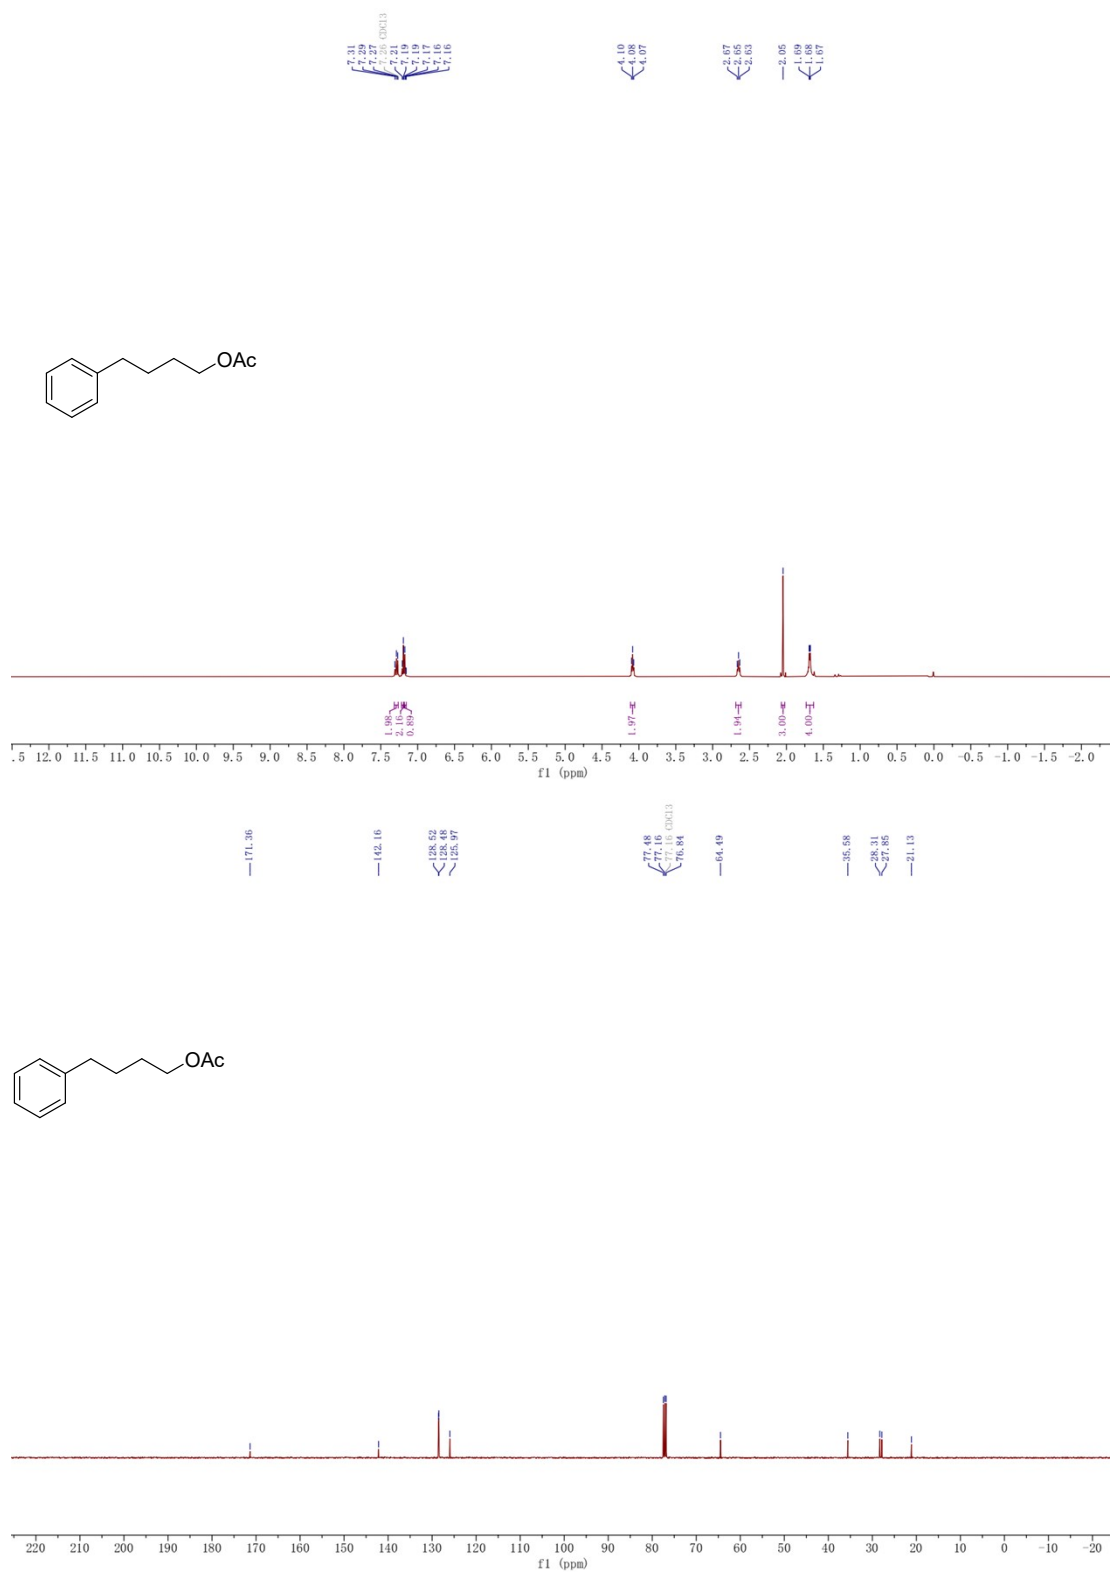

**Figure S20.** <sup>1</sup>H (top) and <sup>13</sup>C (bottom) NMR spectra of 4-phenylbutyl acetate from 4-phenylbutan-1-ol (table 3, entry 20).



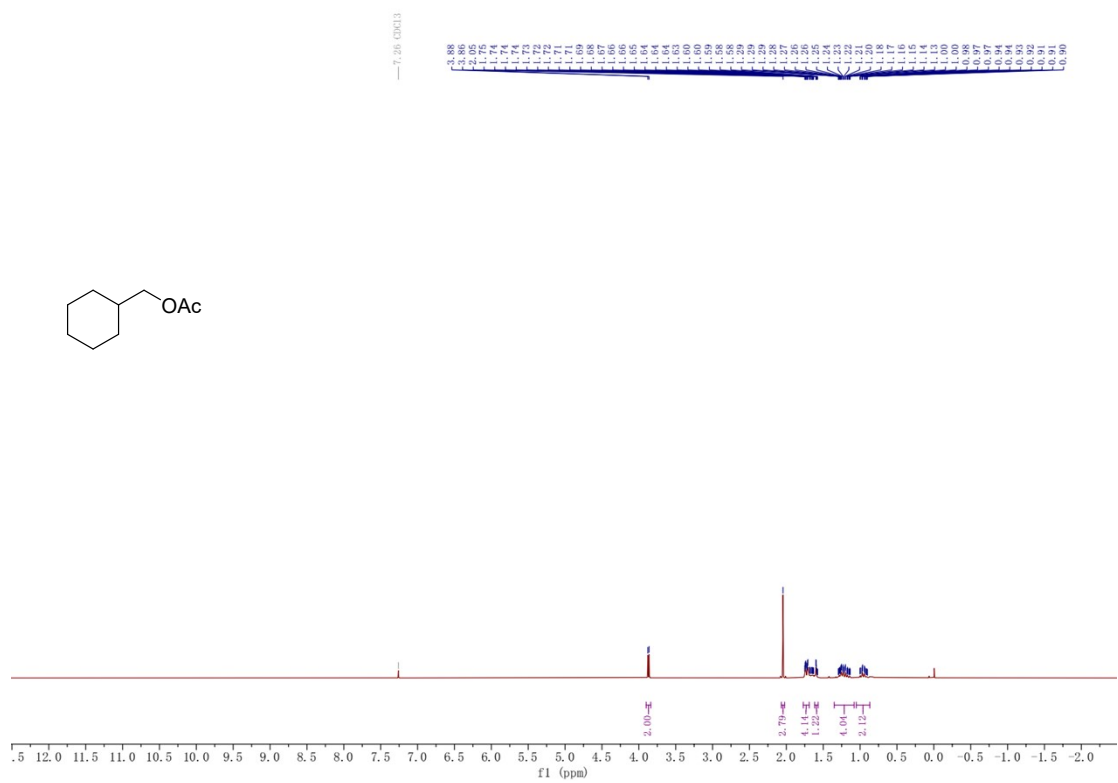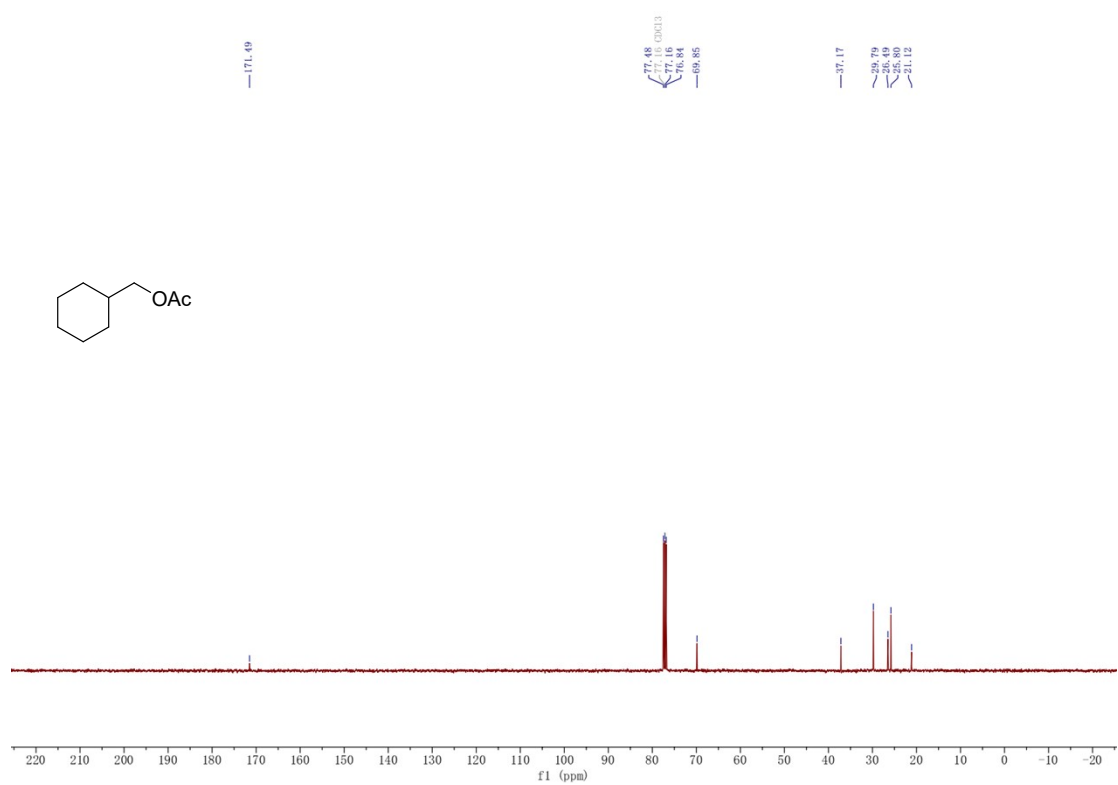

**Figure S21.**  $^1\text{H}$  (top) and  $^{13}\text{C}$  (bottom) NMR spectra of cyclohexylmethyl acetate from cyclohexylmethanol (table 3, entry 21).

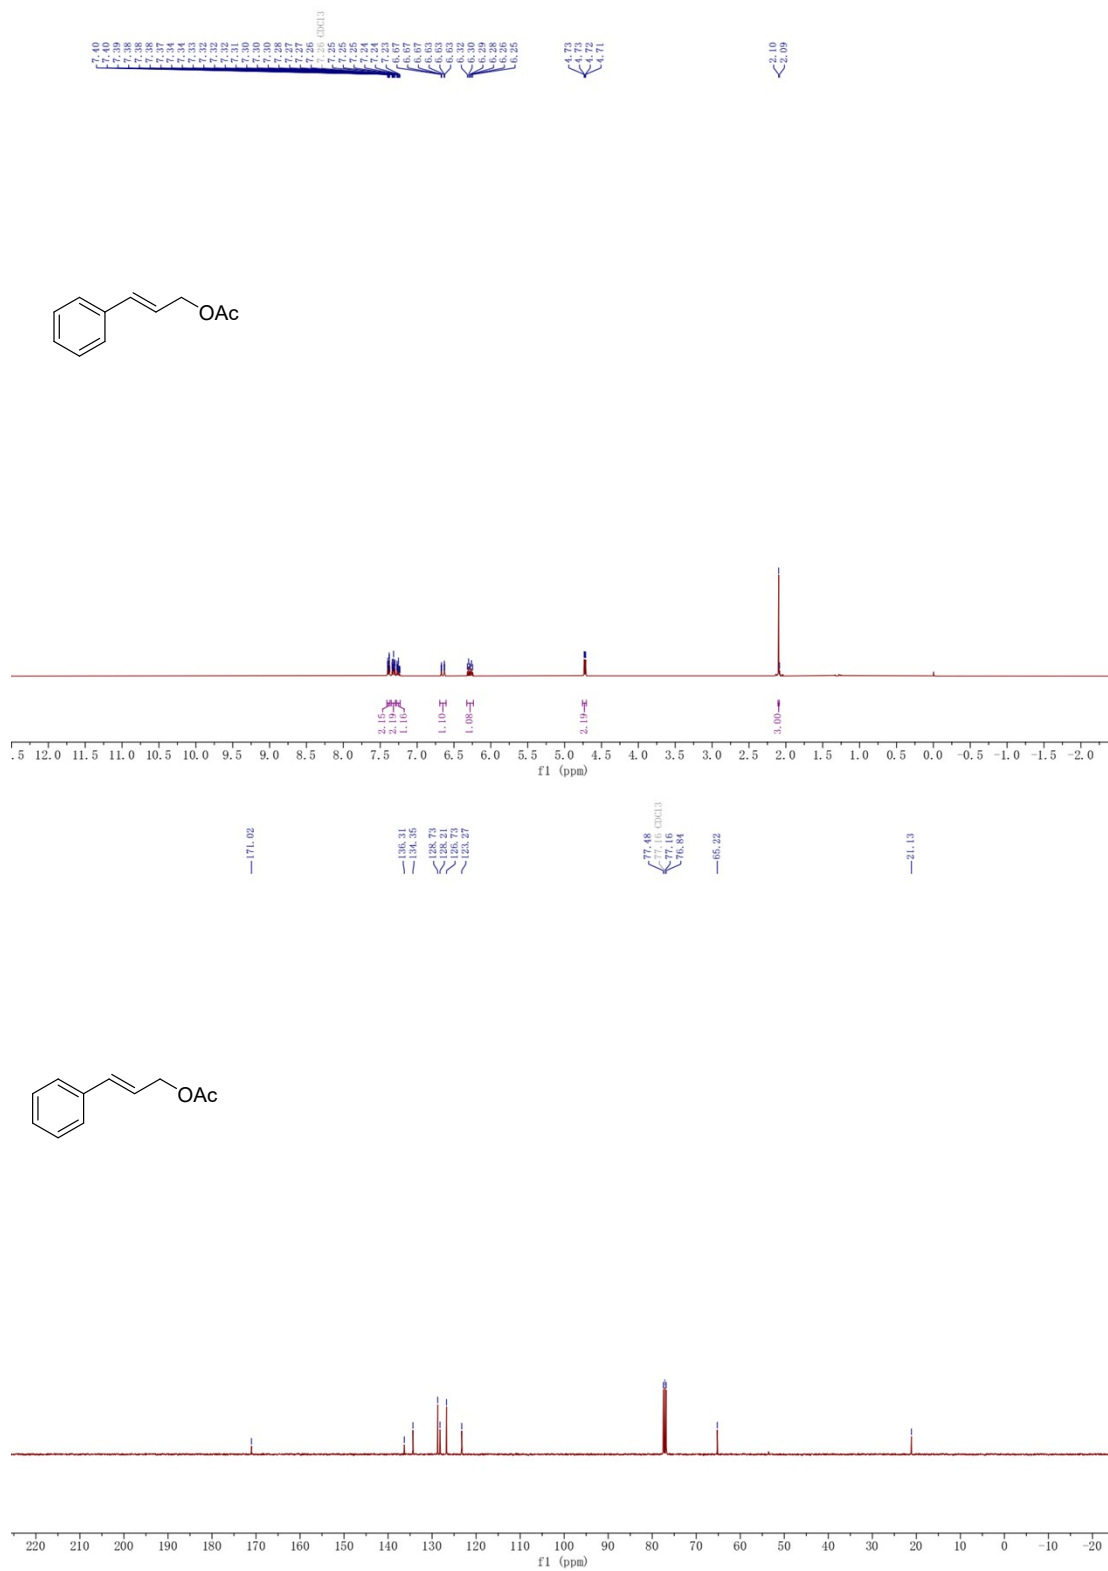

**Figure S22.** <sup>1</sup>H (top) and <sup>13</sup>C (bottom) NMR spectra of Cinnamyl acetate from Cinnamyl alcohol (table 3, entry 22).

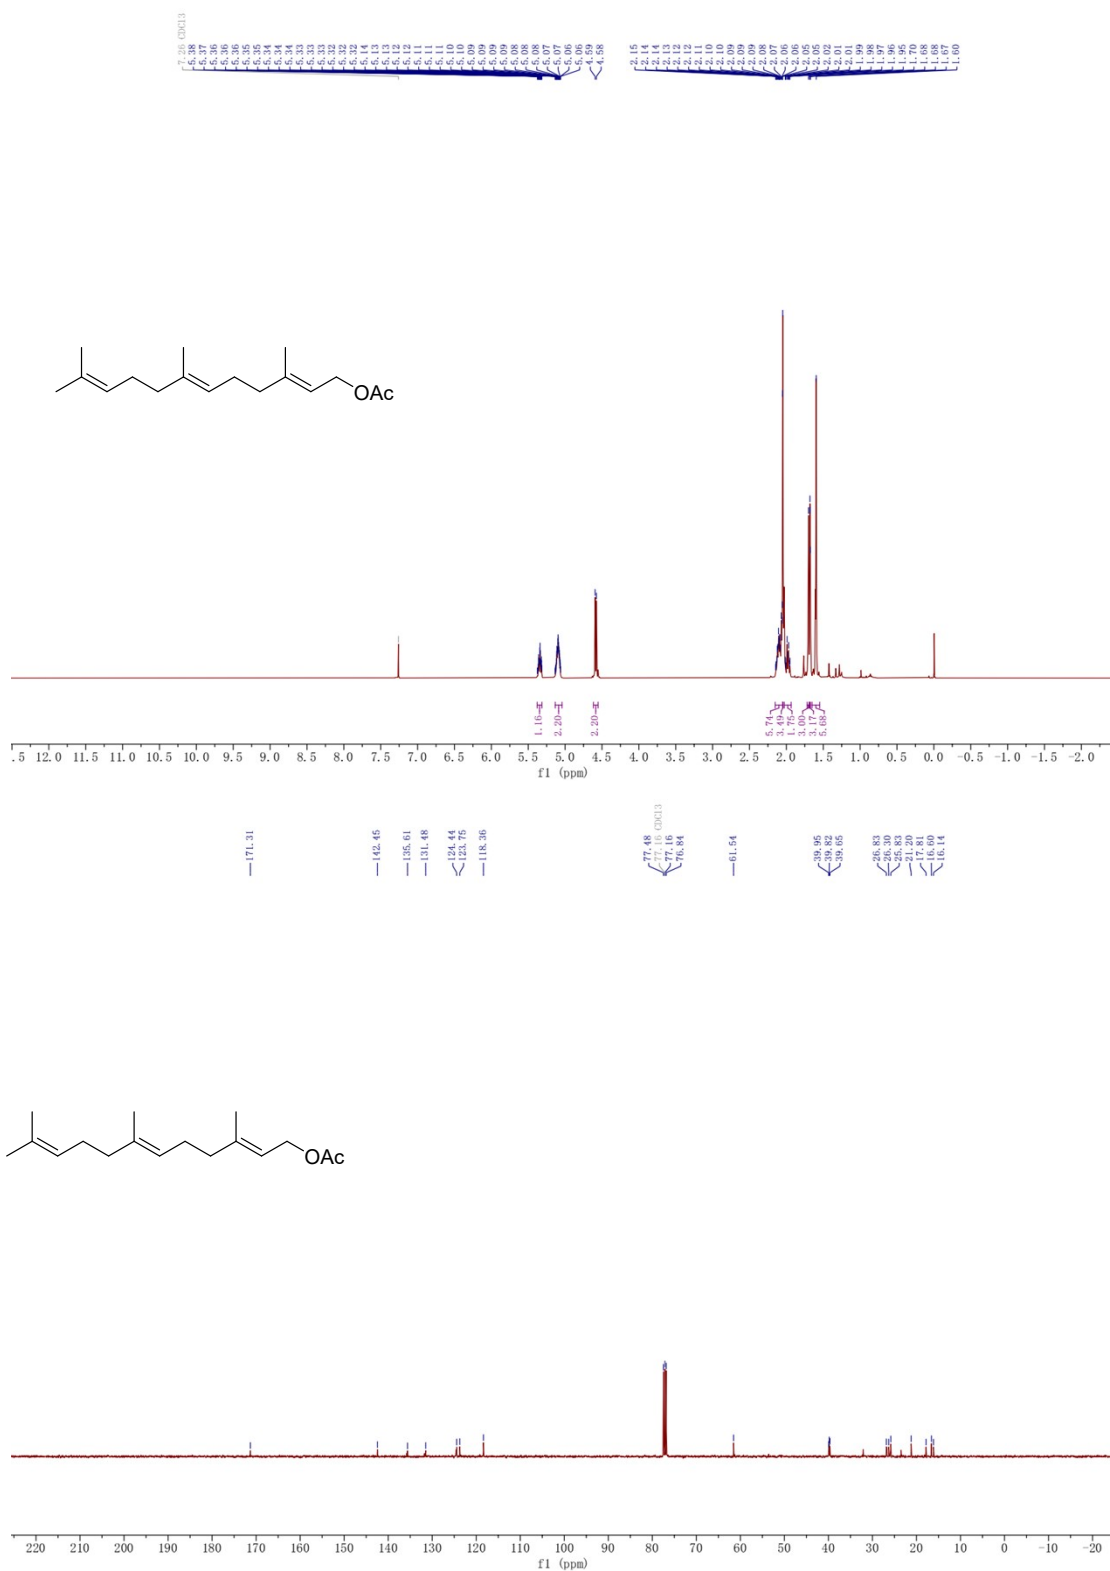

**Figure S23.** <sup>1</sup>H (top) and <sup>13</sup>C (bottom) NMR spectra of Farnesyl acetate from Farnesol (table 3, entry 23).

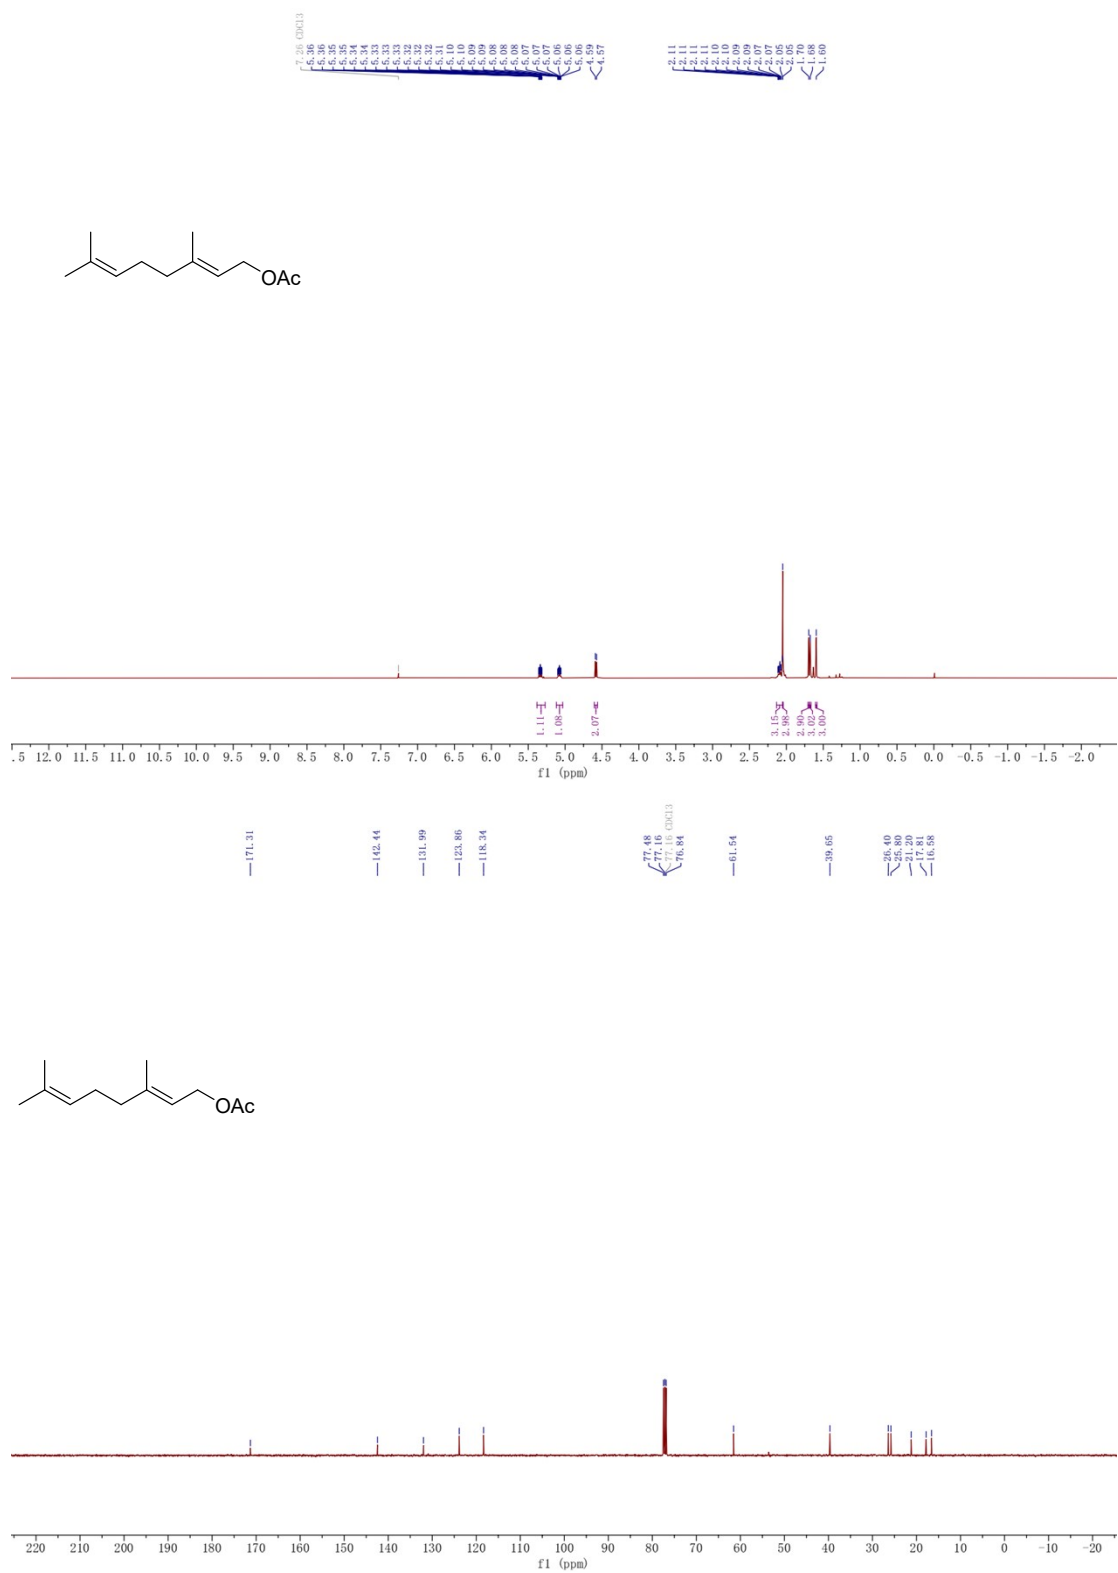

**Figure S24.** <sup>1</sup>H (top) and <sup>13</sup>C (bottom) NMR spectra of Geranyl acetate from Geranio I (table 3, entry 24).

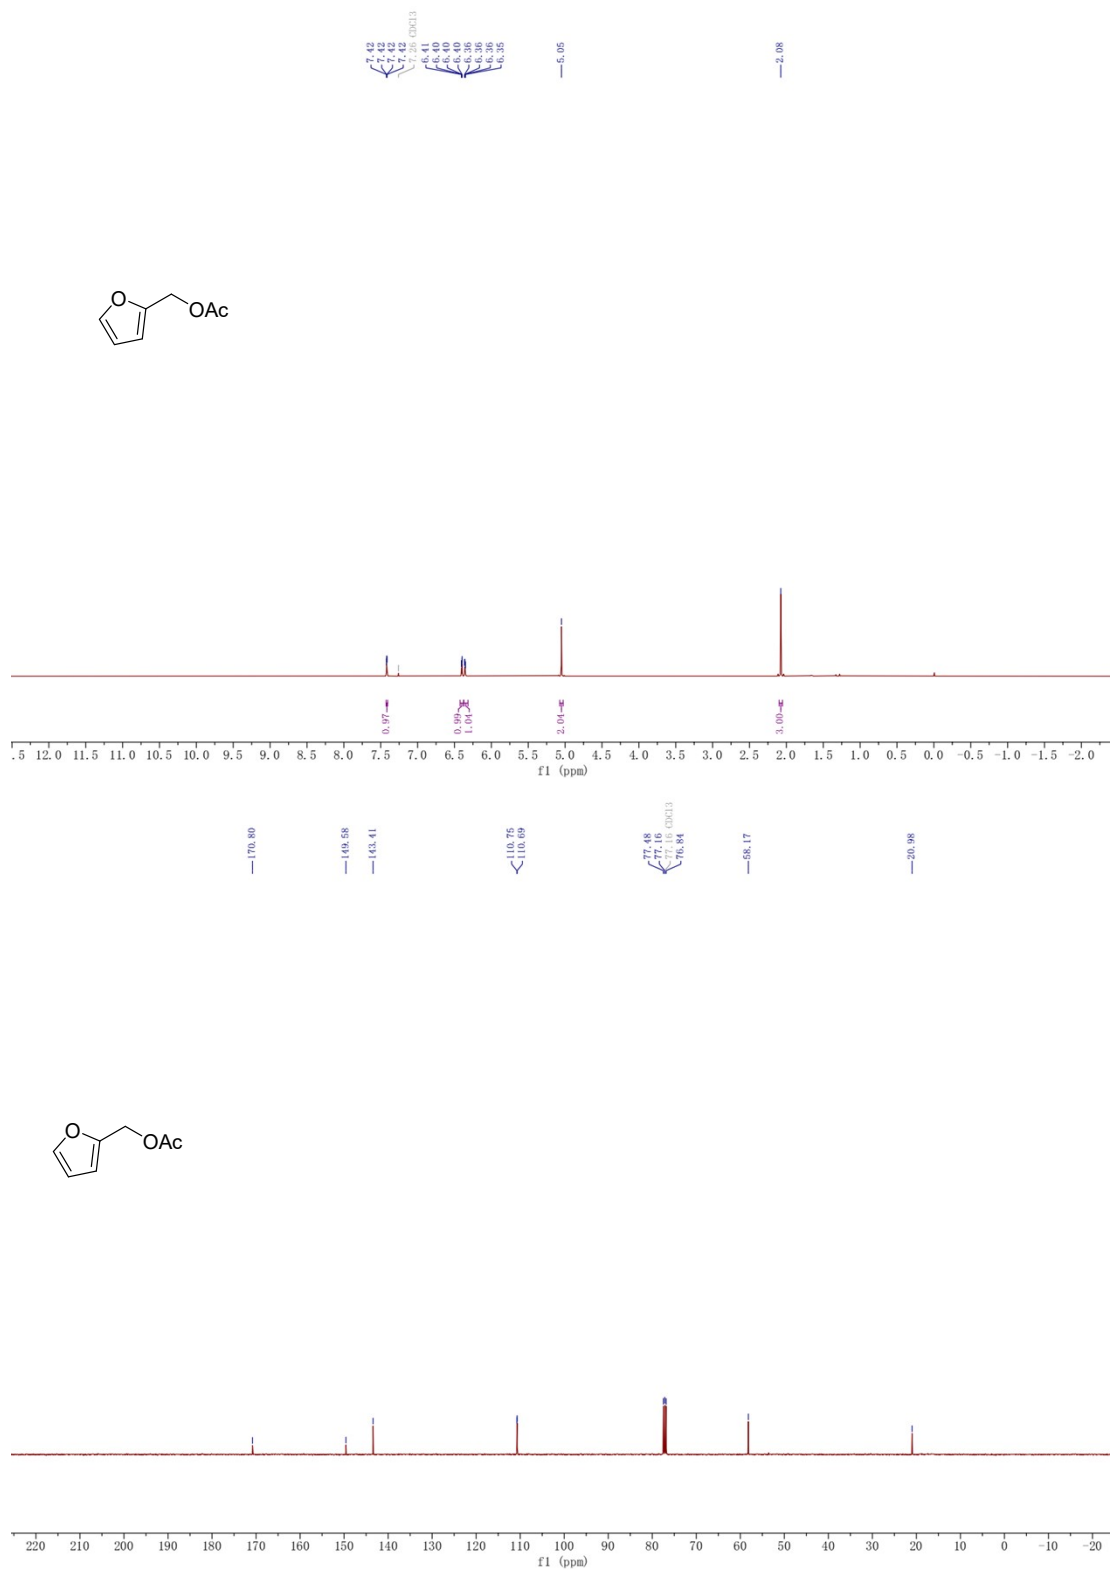

**Figure S25. <sup>1</sup>H (top) and <sup>13</sup>C (bottom) NMR spectra of furan-2-ylmethyl acetate from furan-2-ylmethanol(table entry 3, entry 27).**

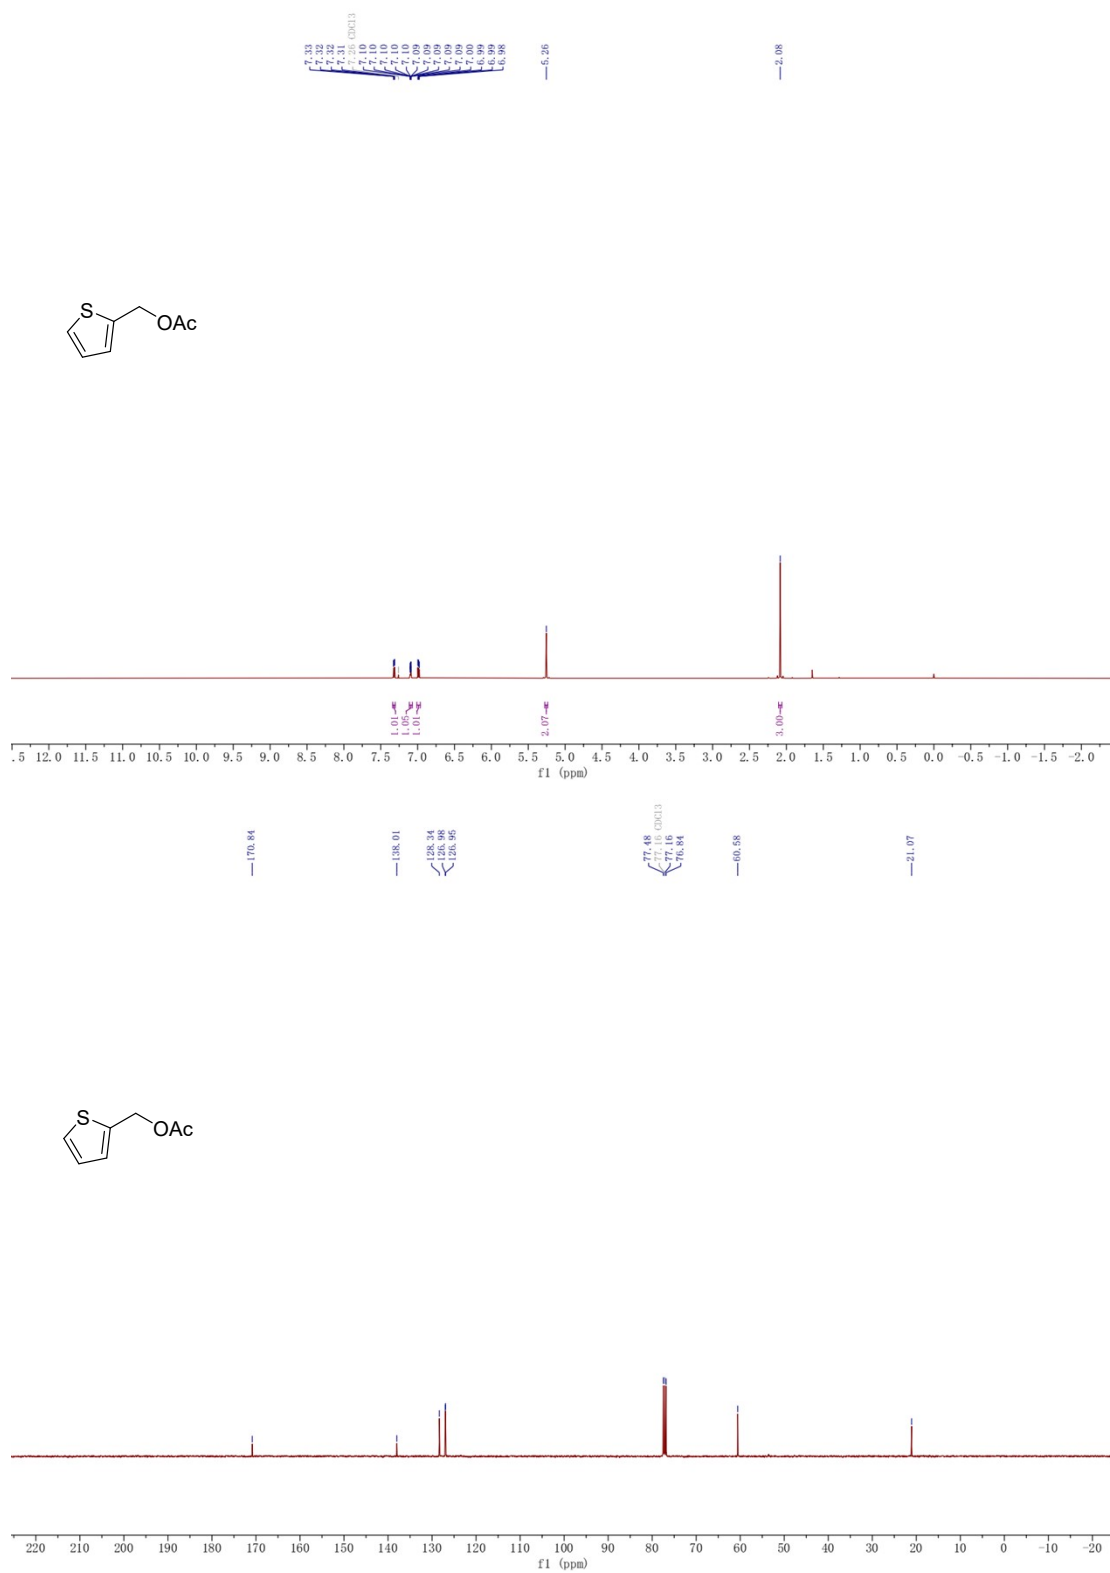

**Figure S26.** <sup>1</sup>H (top) and <sup>13</sup>C (bottom) NMR spectra of thiophen-2-ylmethyl acetate from thiophen-2-ylmethanol (table 3, entry 28).

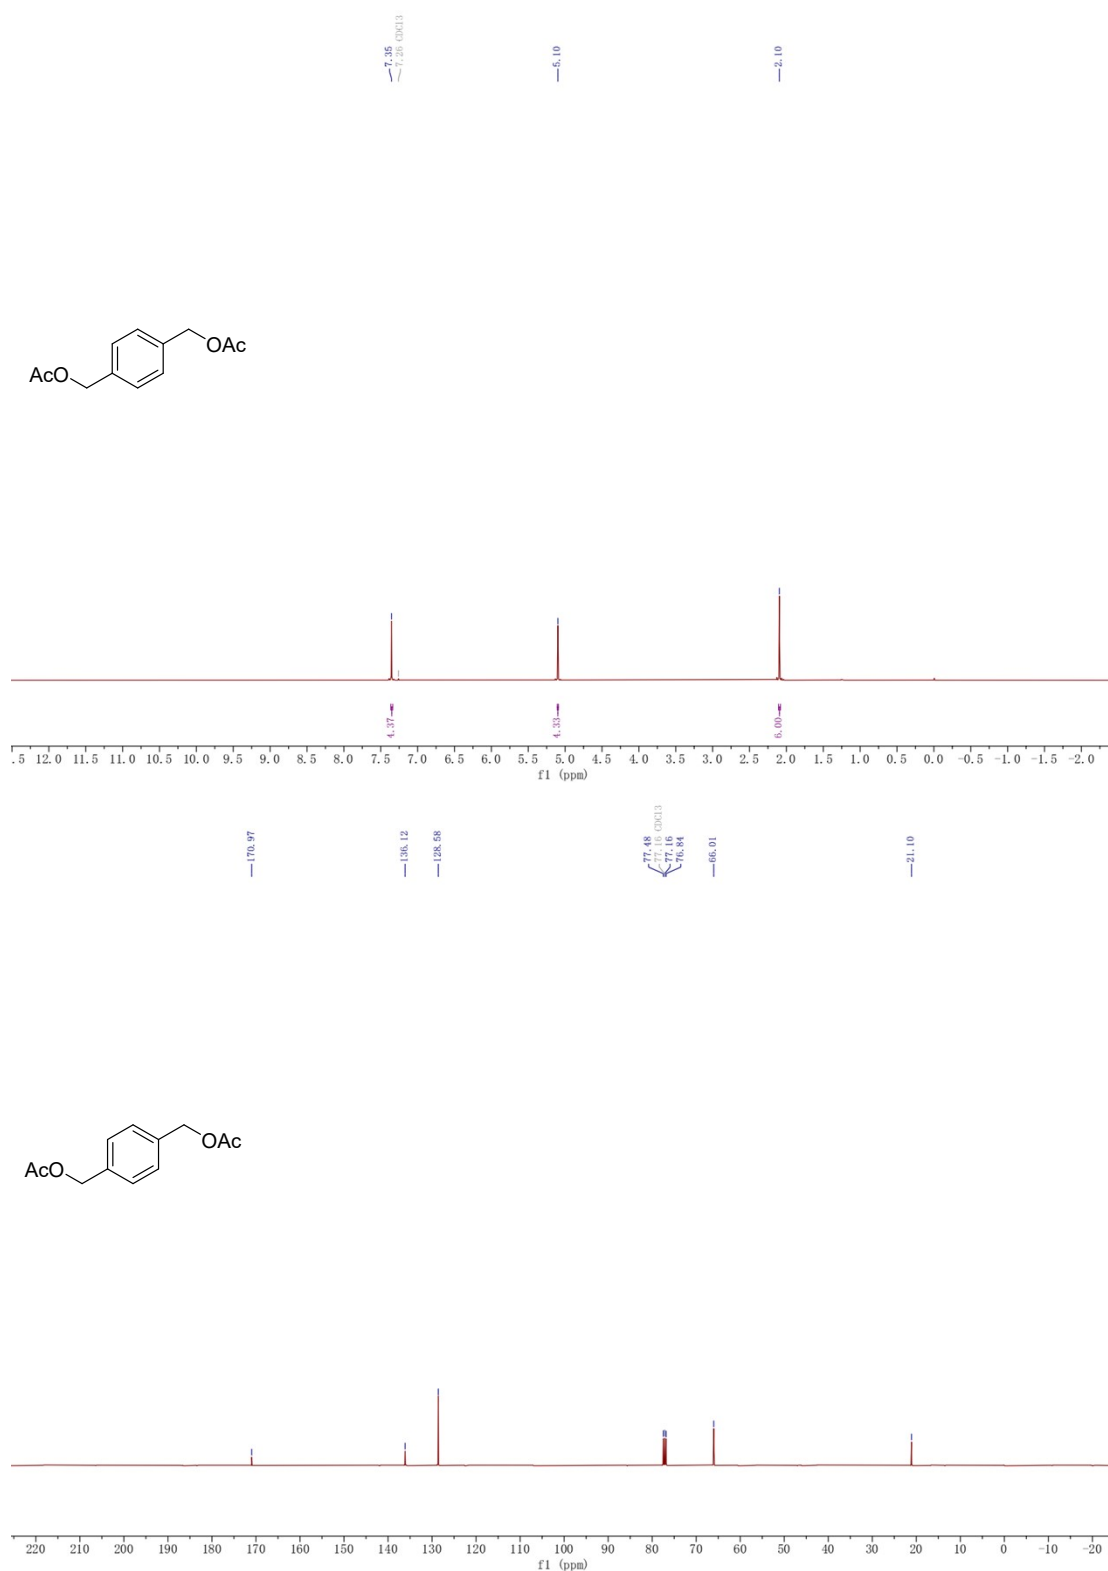

**Figure S27.** <sup>1</sup>H (top) and <sup>13</sup>C (bottom) NMR spectra of 1,4-phenylenebis(methylene) diacetate from 1,4-phenylenedimethanol (table 3, entry 29).

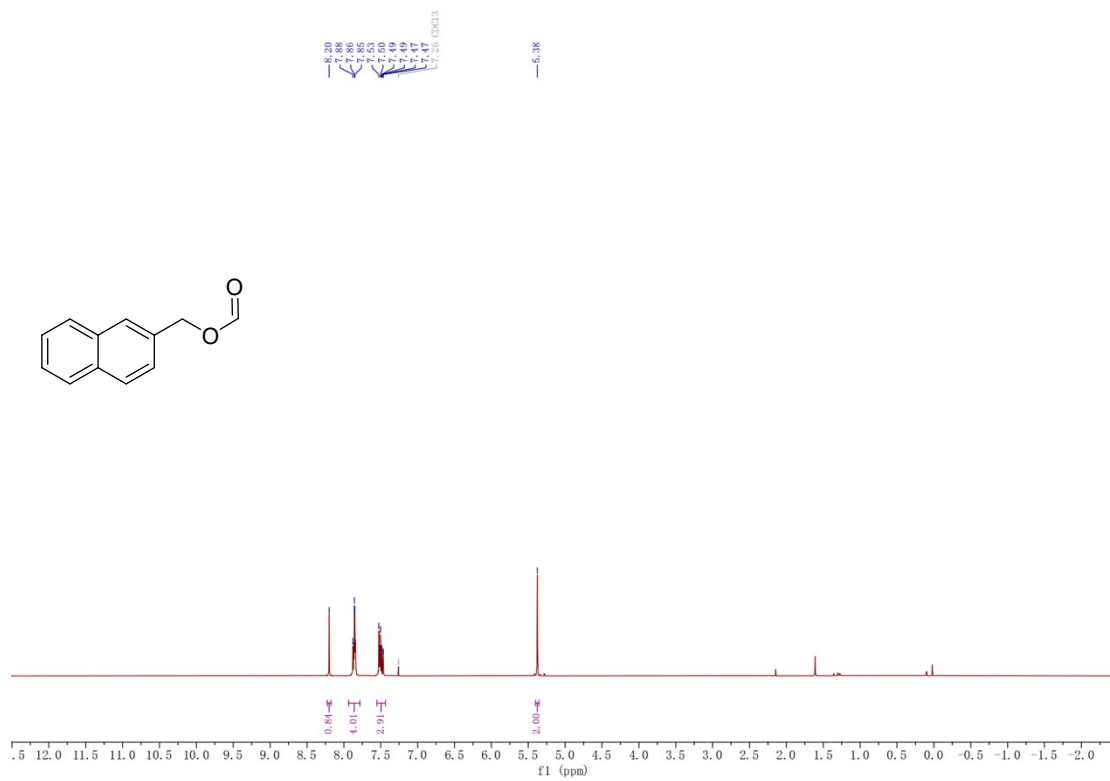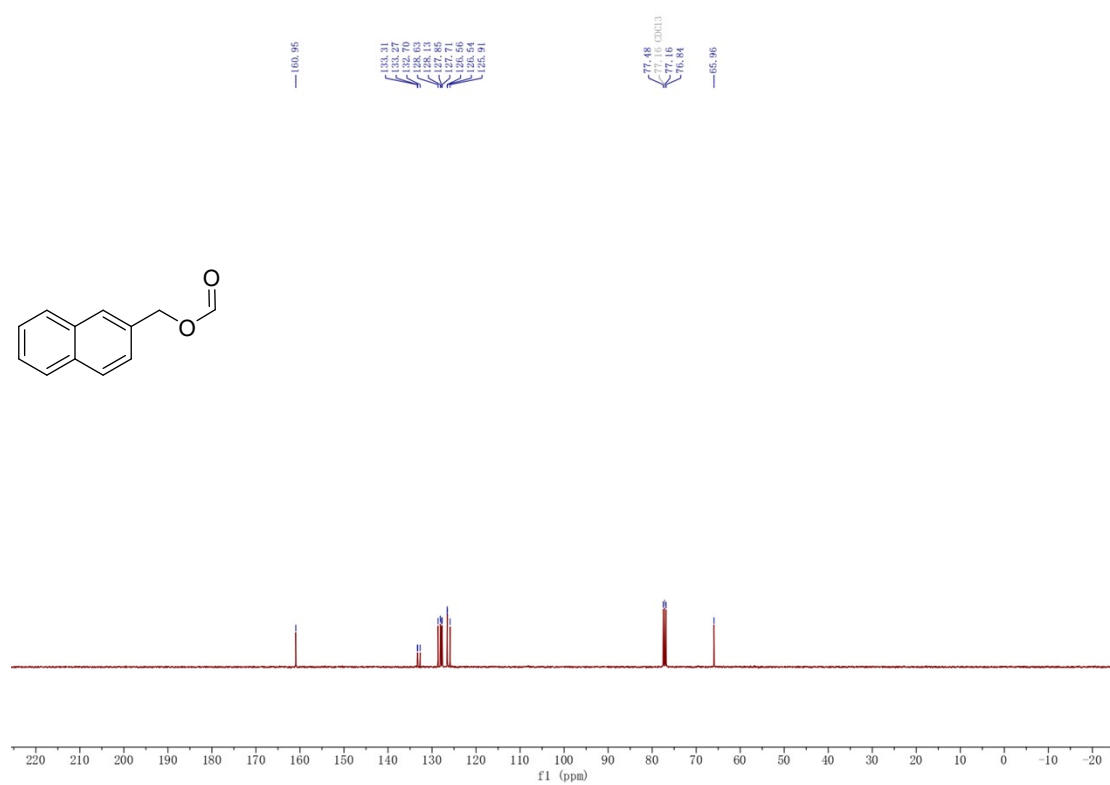

**Figure S28.** <sup>1</sup>H (top) and <sup>13</sup>C (bottom) NMR spectra of naphthalen-2-ylmethyl formate from naphthalen-2-ylmethanol (table 4, entry 7).



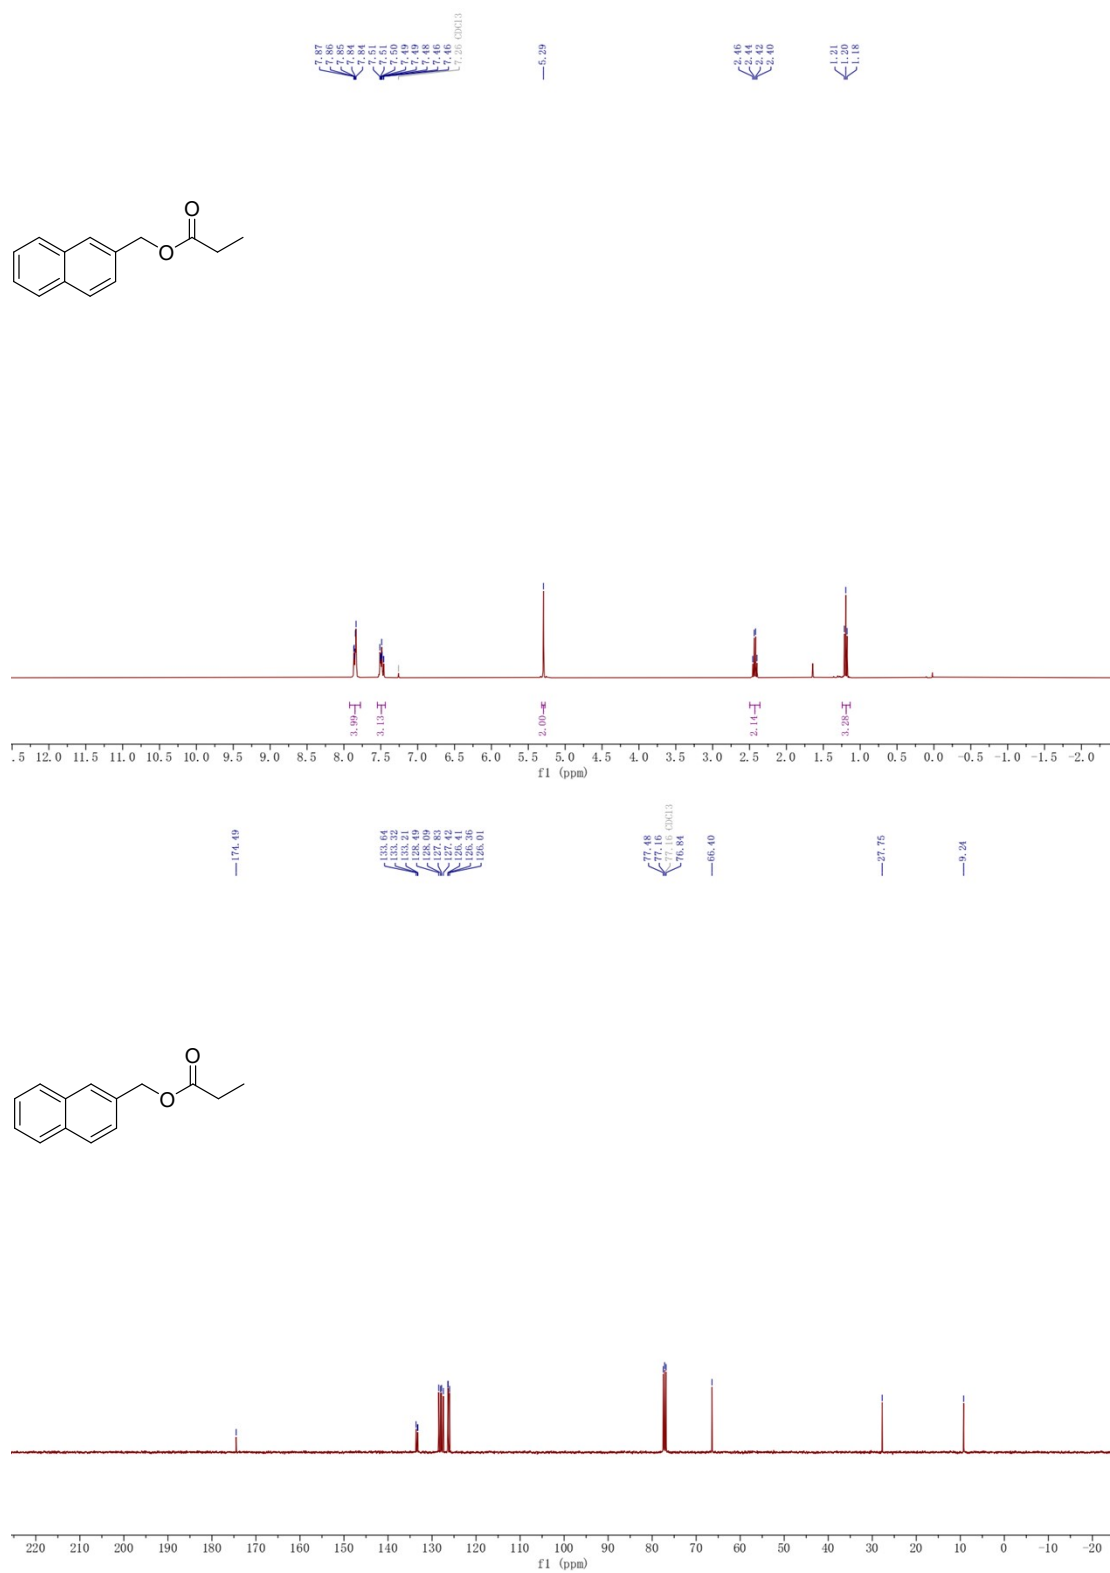

**Figure S29.** <sup>1</sup>H (top) and <sup>13</sup>C (bottom) NMR spectra of naphthalen-2-ylmethyl propionate from naphthalen-2-ylmethanol (table 4, entry 8).

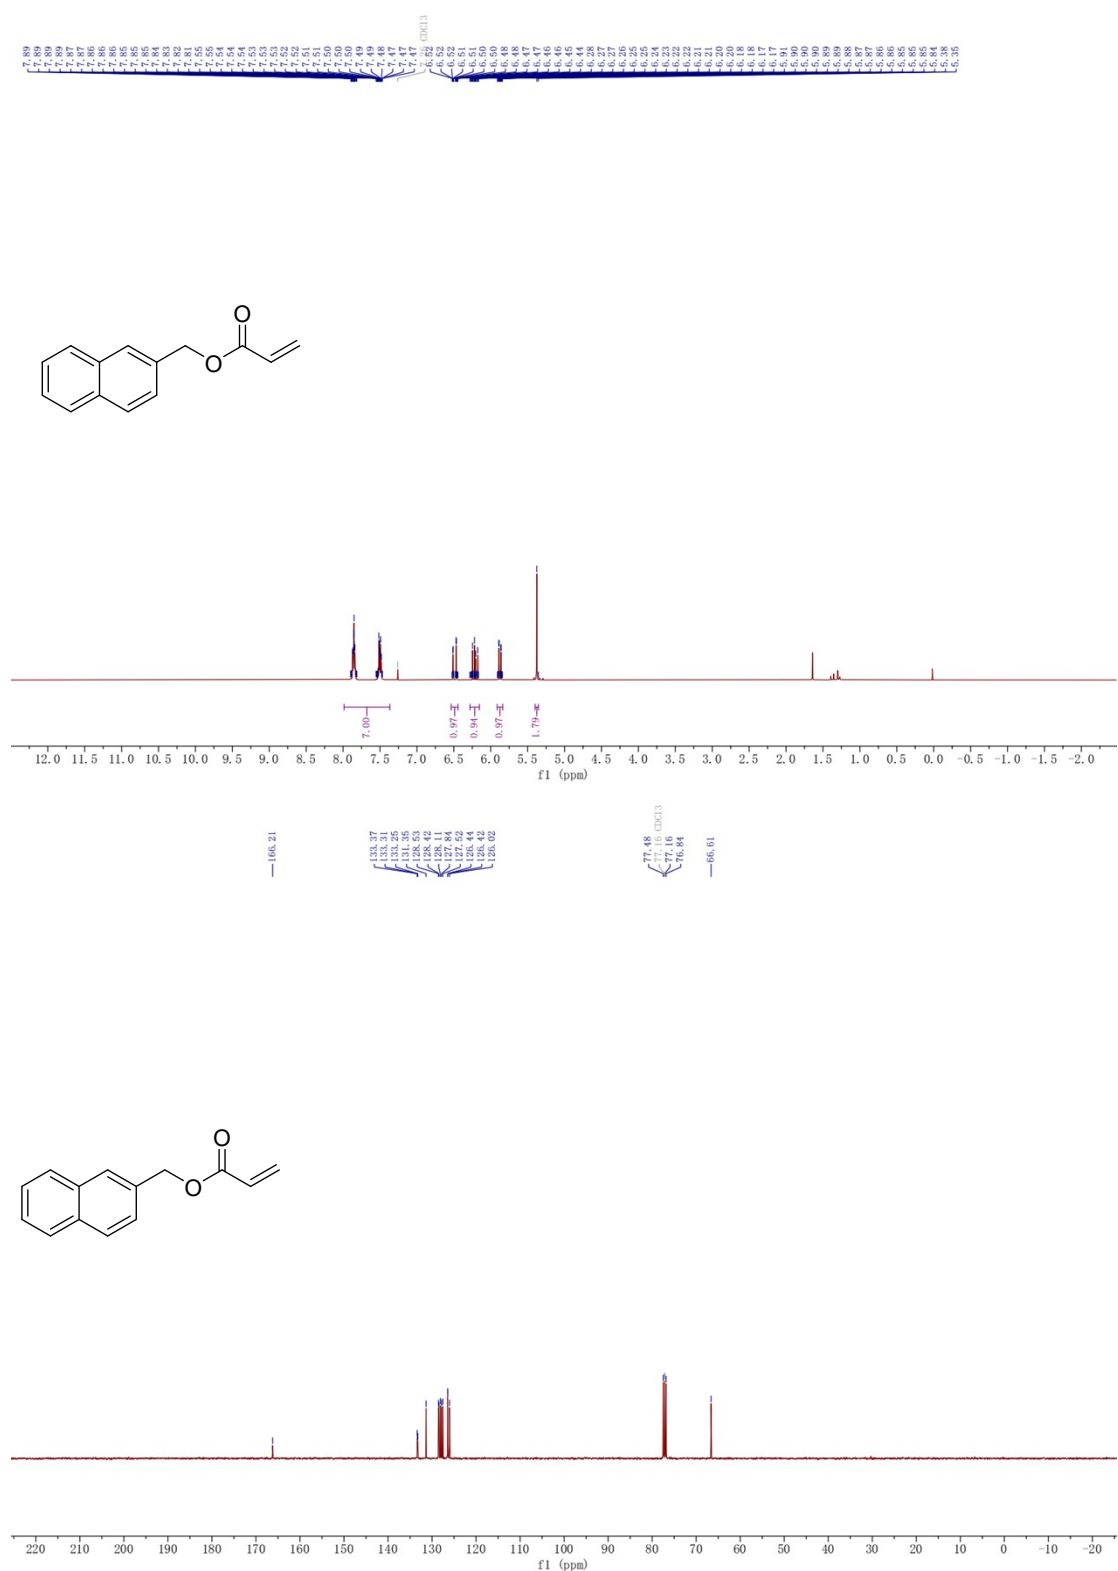

**Figure S30.** <sup>1</sup>H (top) and <sup>13</sup>C (bottom) NMR spectra of naphthalen-2-ylmethyl acrylate from naphthalen-2-ylmethanol (table 4, entry 9-1).

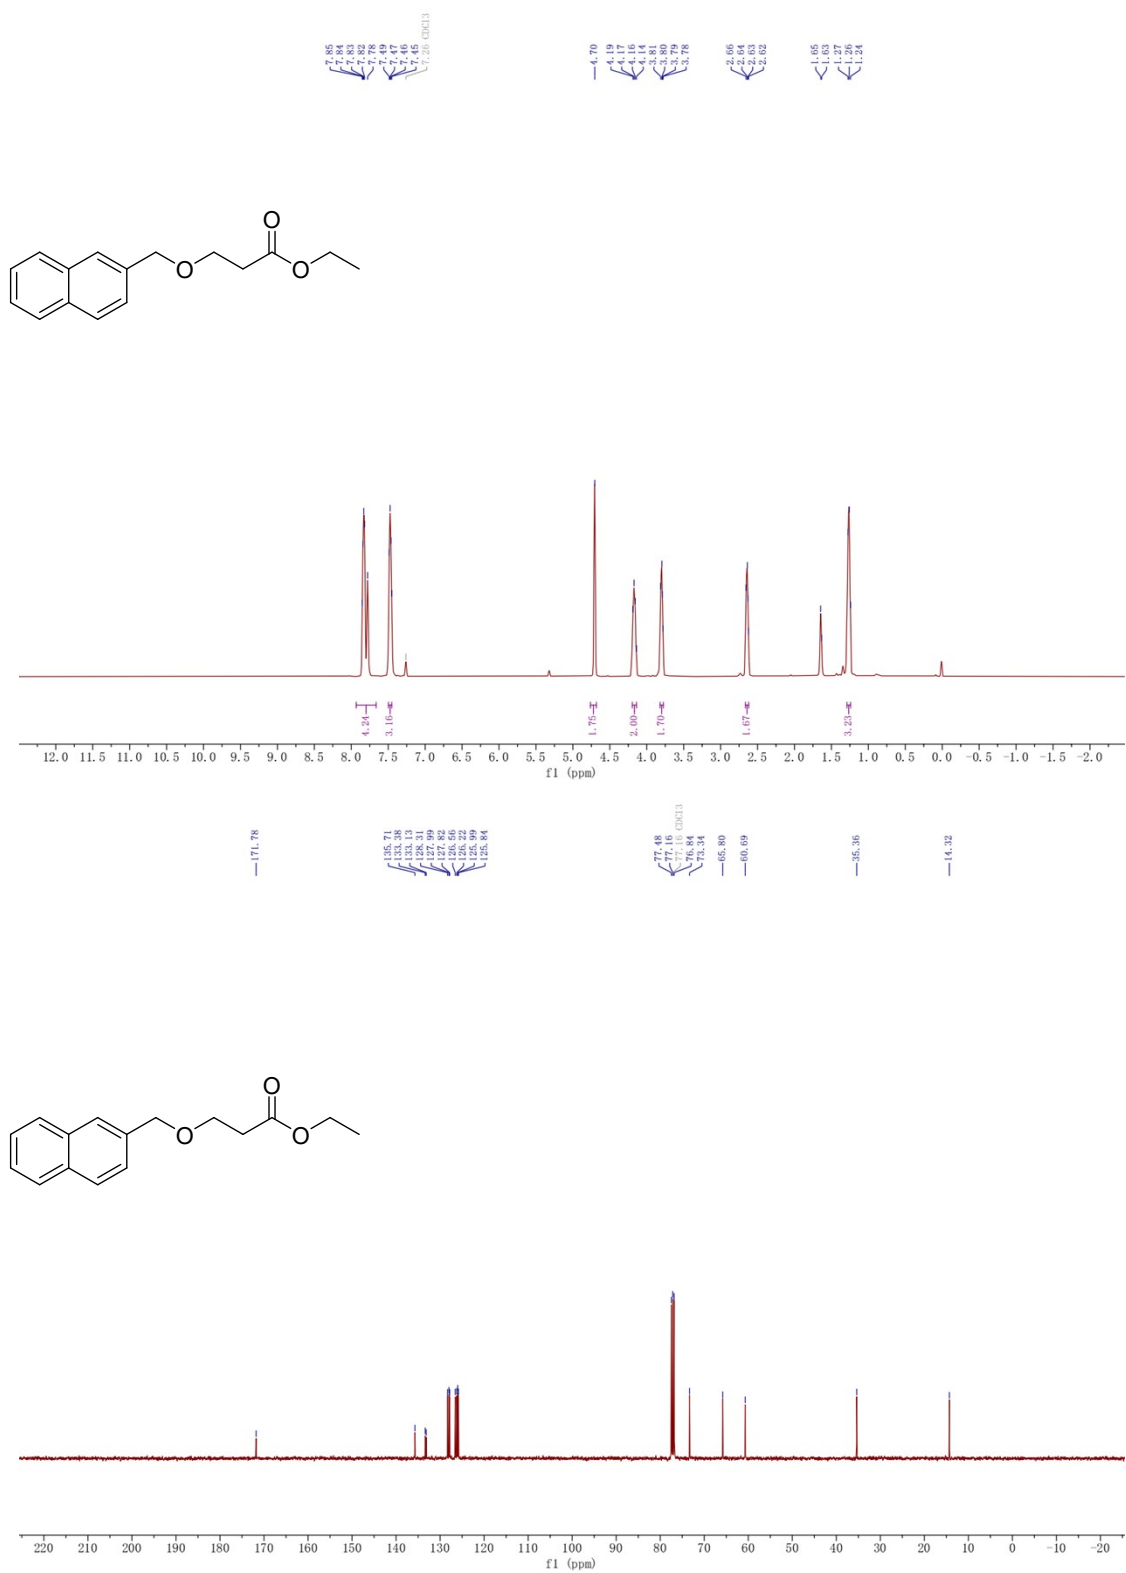

**Figure S31.** <sup>1</sup>H (top) and <sup>13</sup>C (bottom) NMR spectra of ethyl 3-(naphthalen-2-ylmethoxy)propanoate from naphthalen-2-ylmethanol (table 4, entry 9-2).

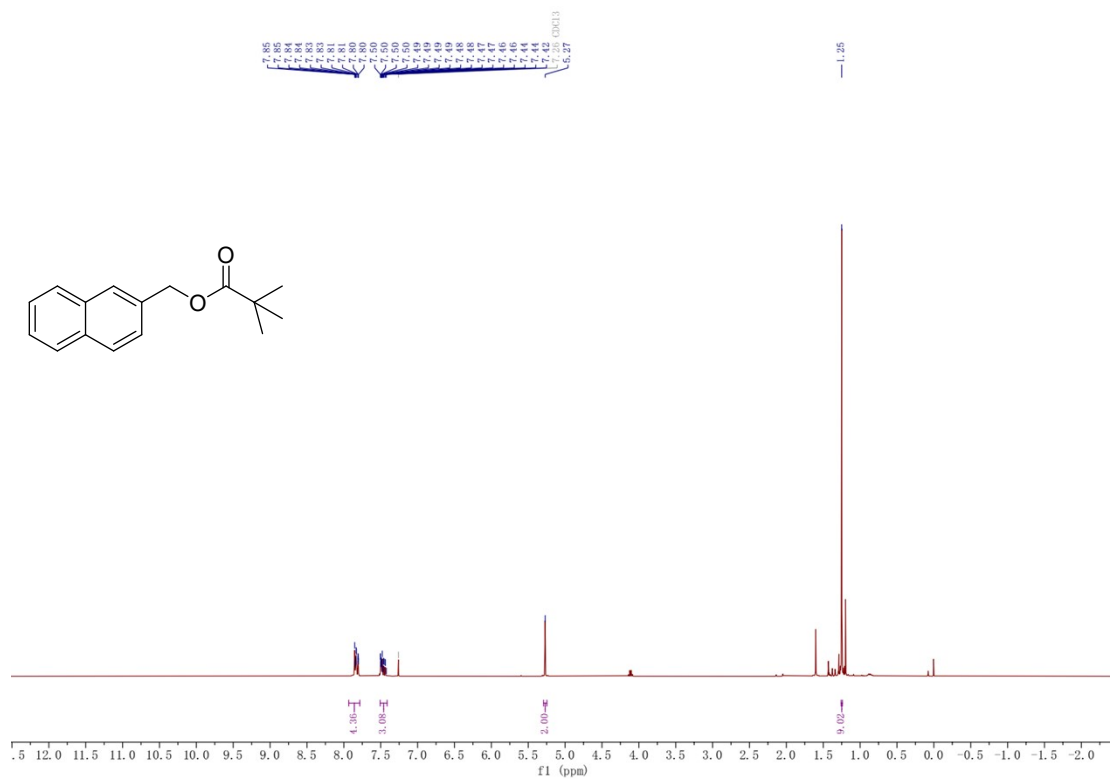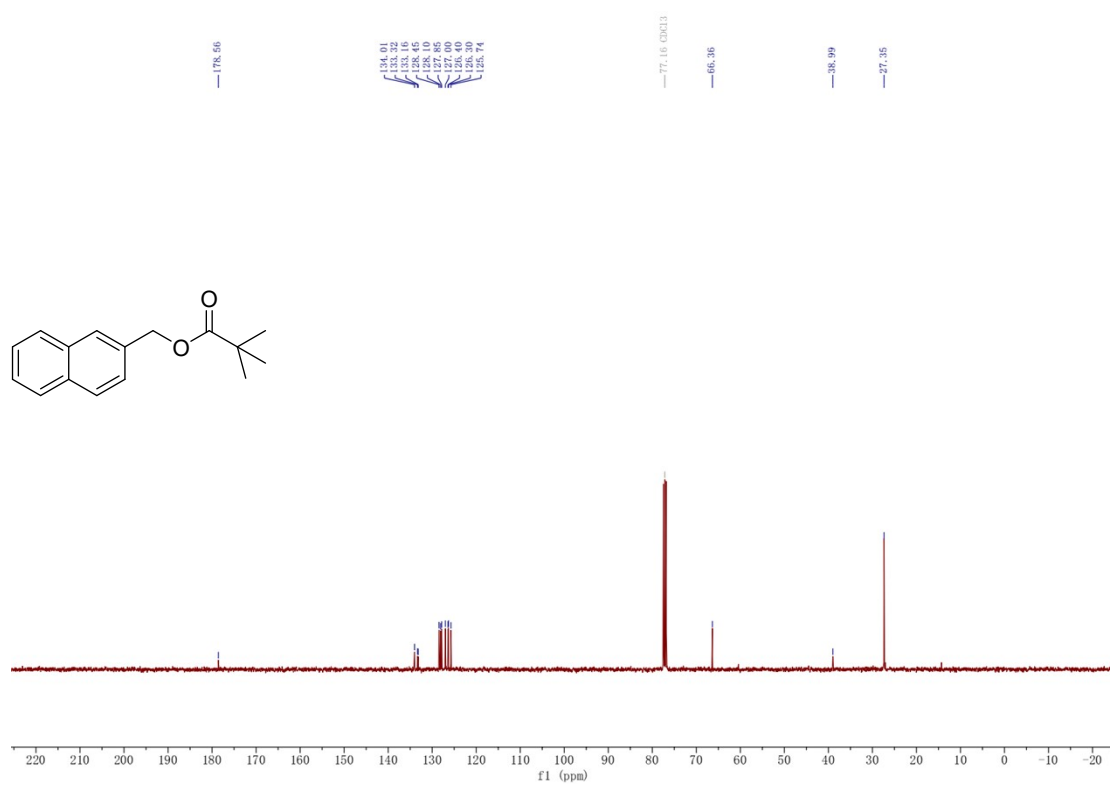

Figure S32. <sup>1</sup>H (top) and <sup>13</sup>C (bottom) NMR spectra of naphthalen-2-ylmethyl pivalate from naphthalen-2-ylmethanol(table4 , entry 11)

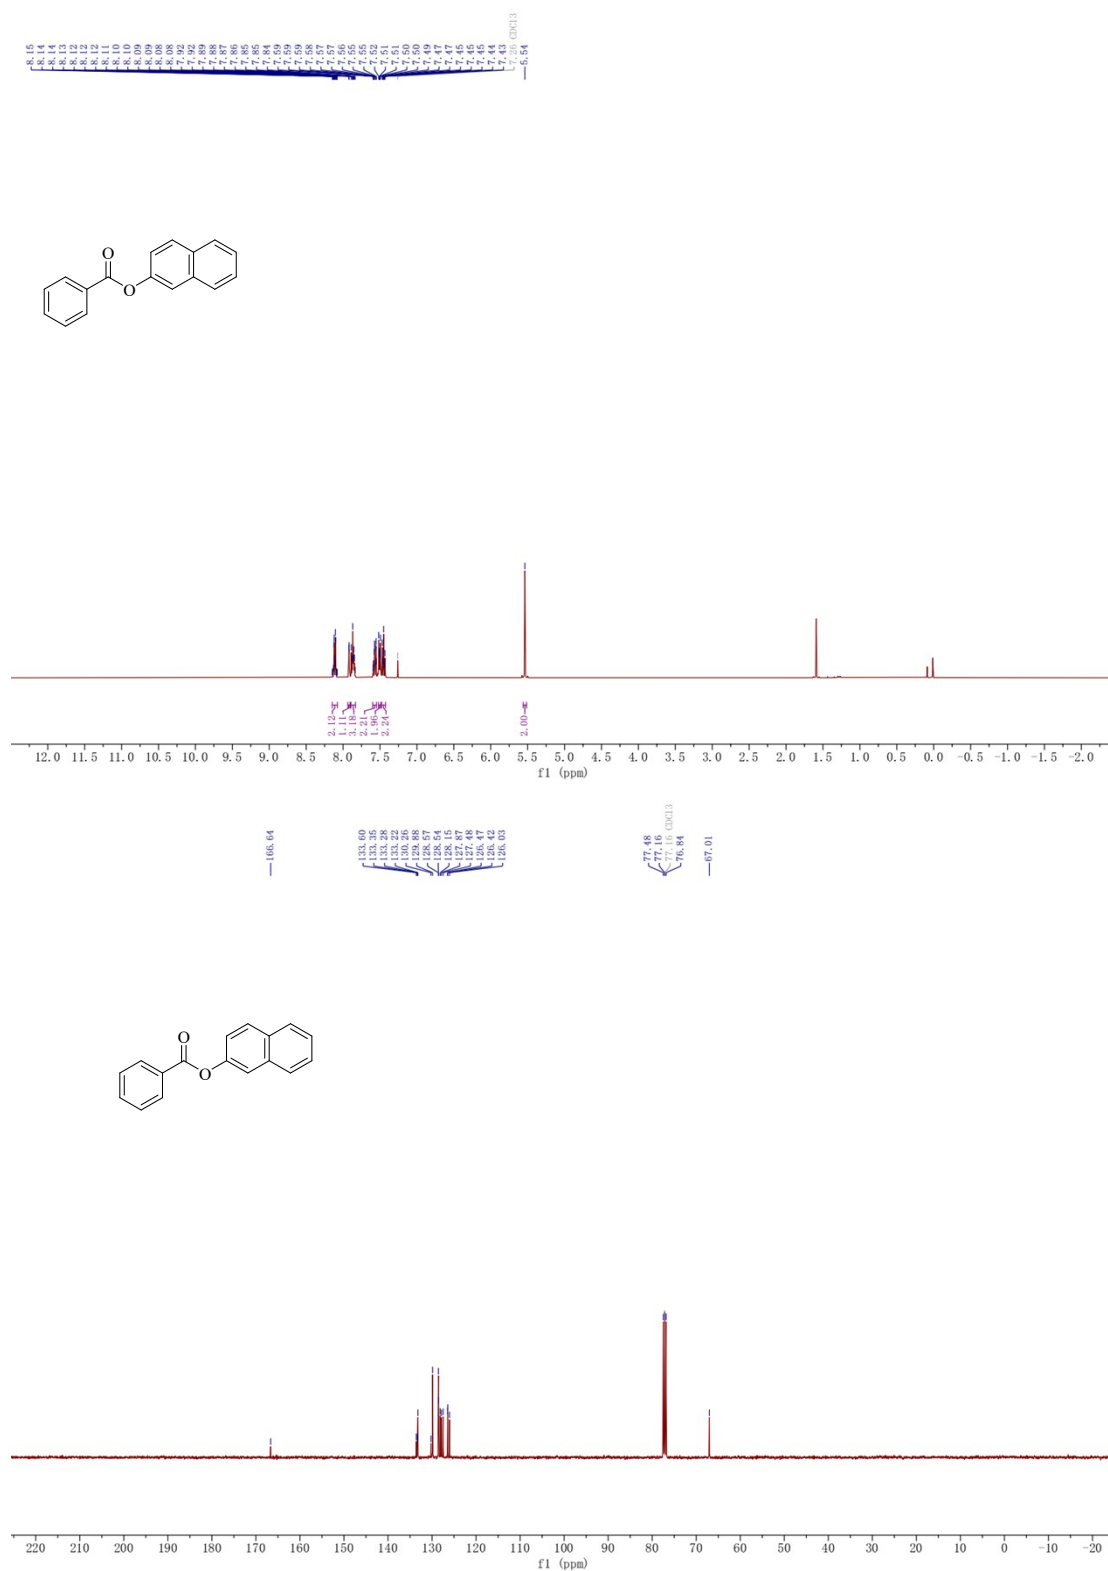

**Figure S33.** <sup>1</sup>H (top) and <sup>13</sup>C (bottom) NMR spectra of naphthalen-2-ylmethyl benzoate from naphthalen-2-ylmethanol (table 4, entry 13)

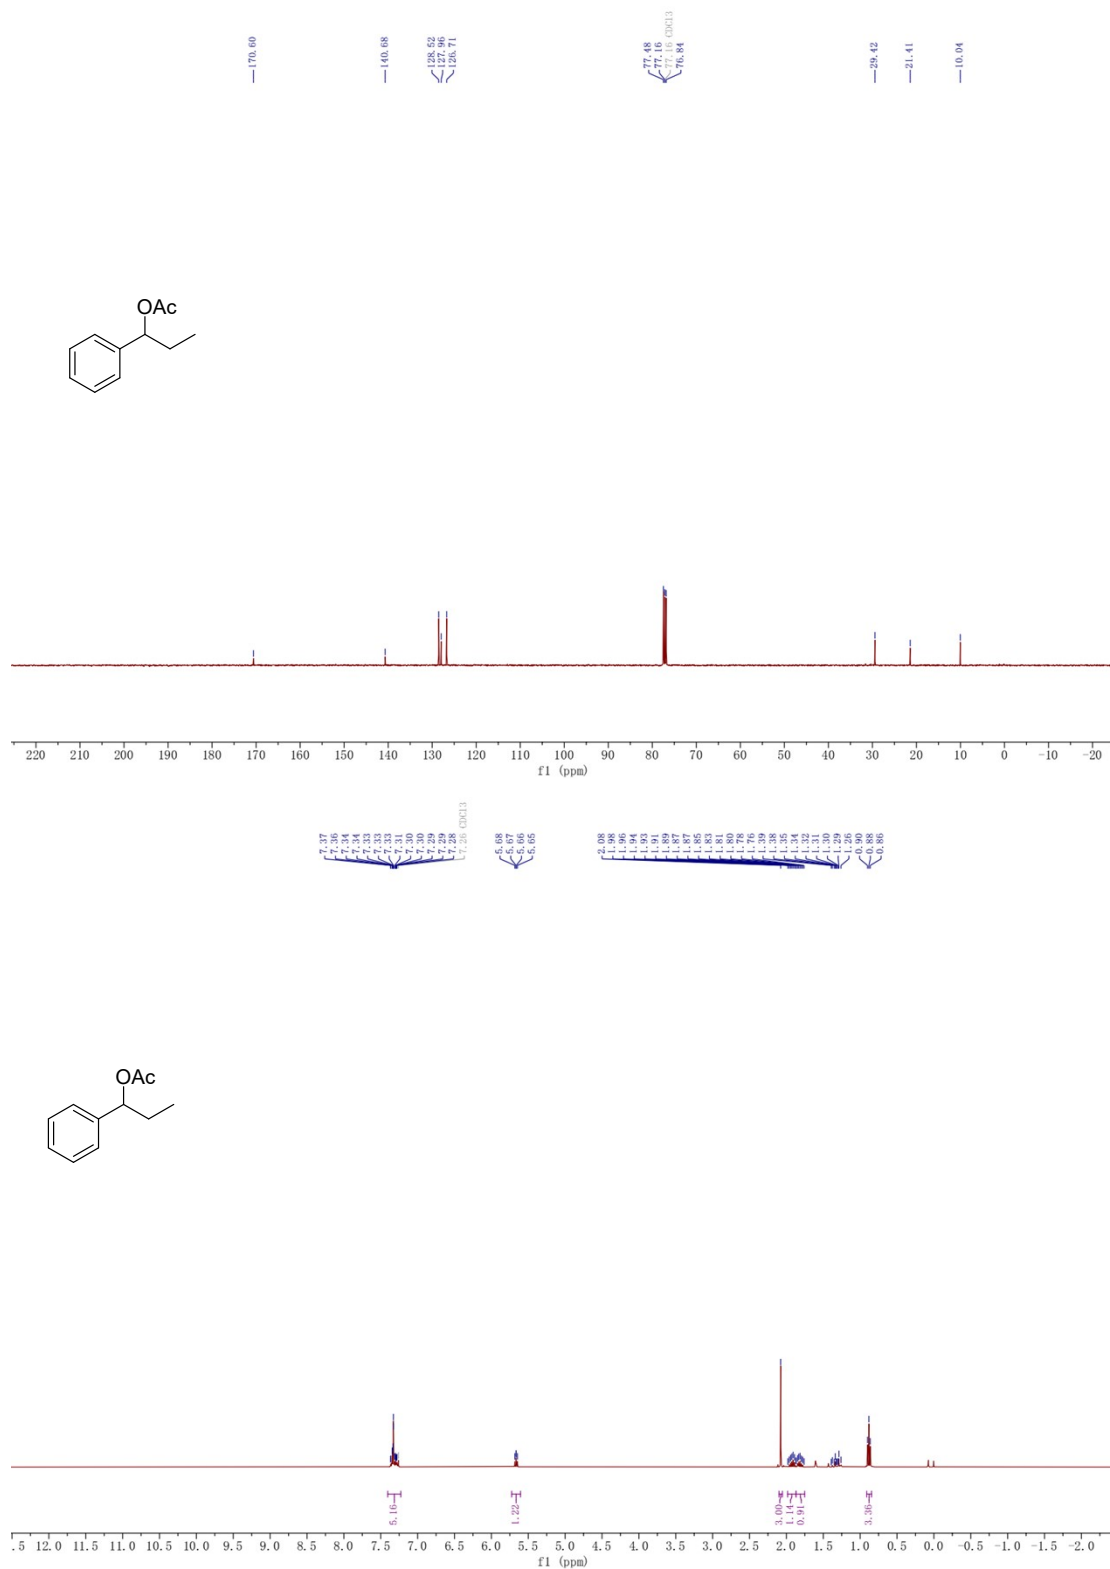

Figure S34.  $^1\text{H}$  (top) and  $^{13}\text{C}$  (bottom) NMR spectra of 1-phenylpropyl acetate from 1-phenylpropan-1-ol (table 5, entry 2).

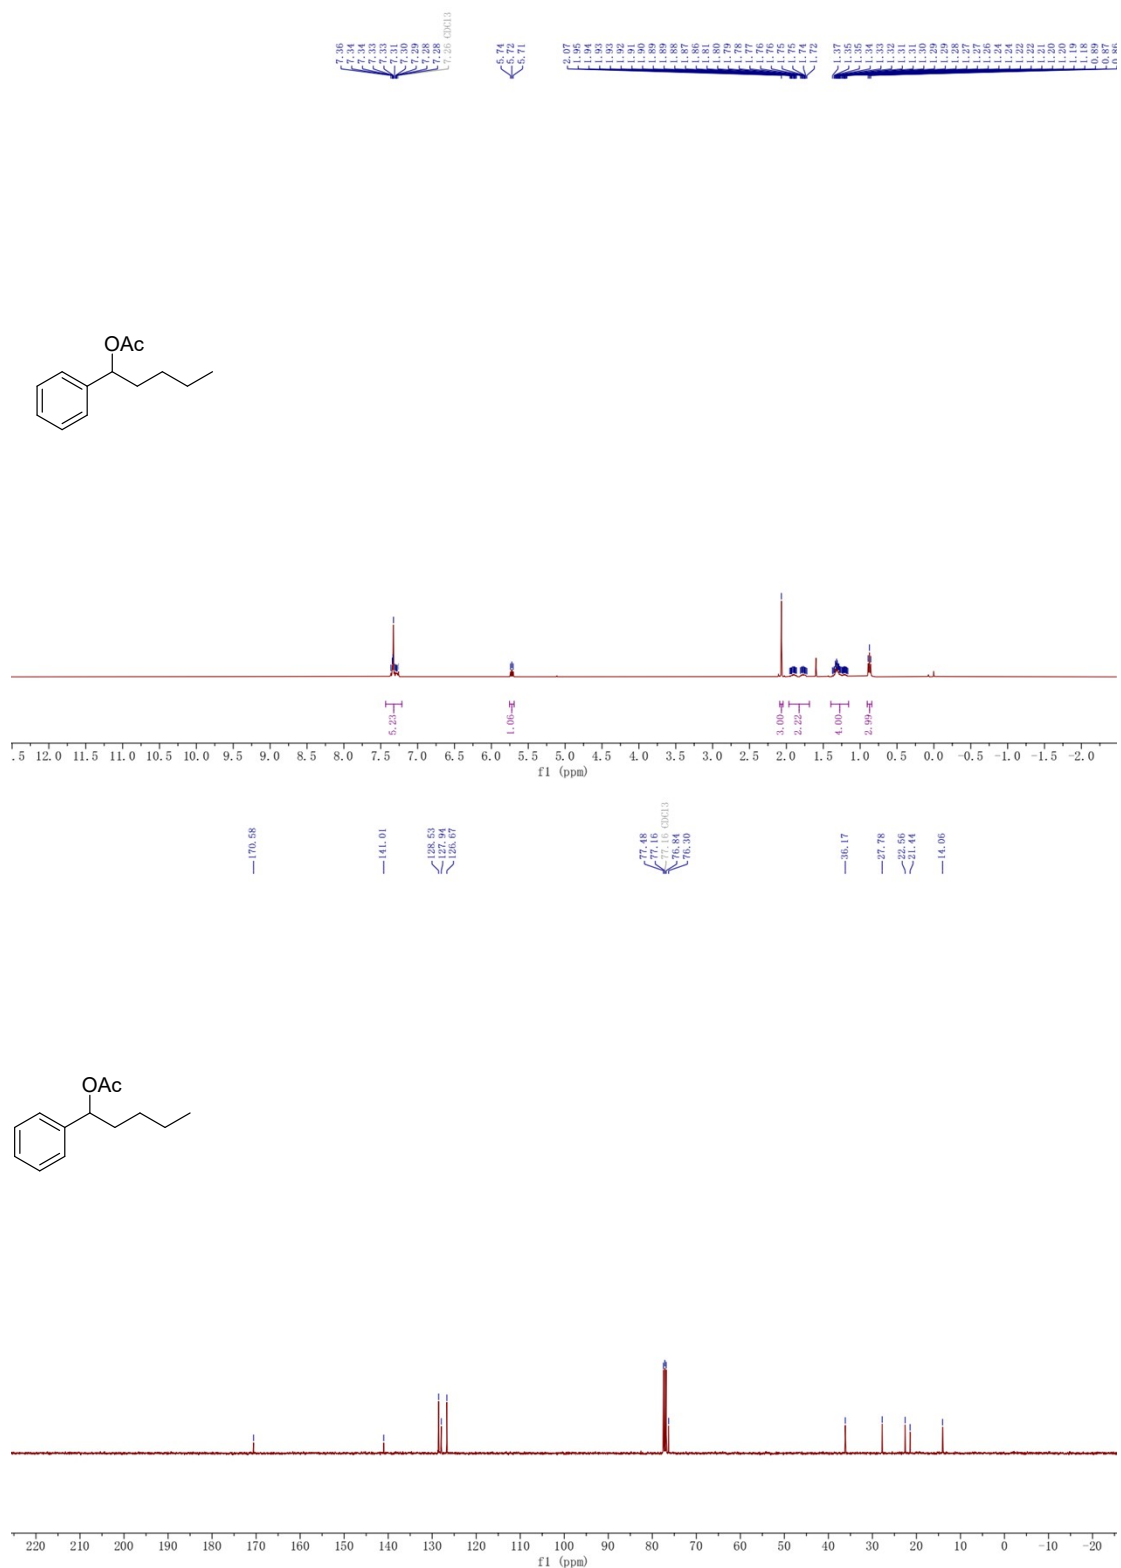

**Figure S35.** <sup>1</sup>H (top) and <sup>13</sup>C (bottom) NMR spectra of 1-phenylpentyl acetate from 1-phenylpentan-1-ol (table 5, entry 3).

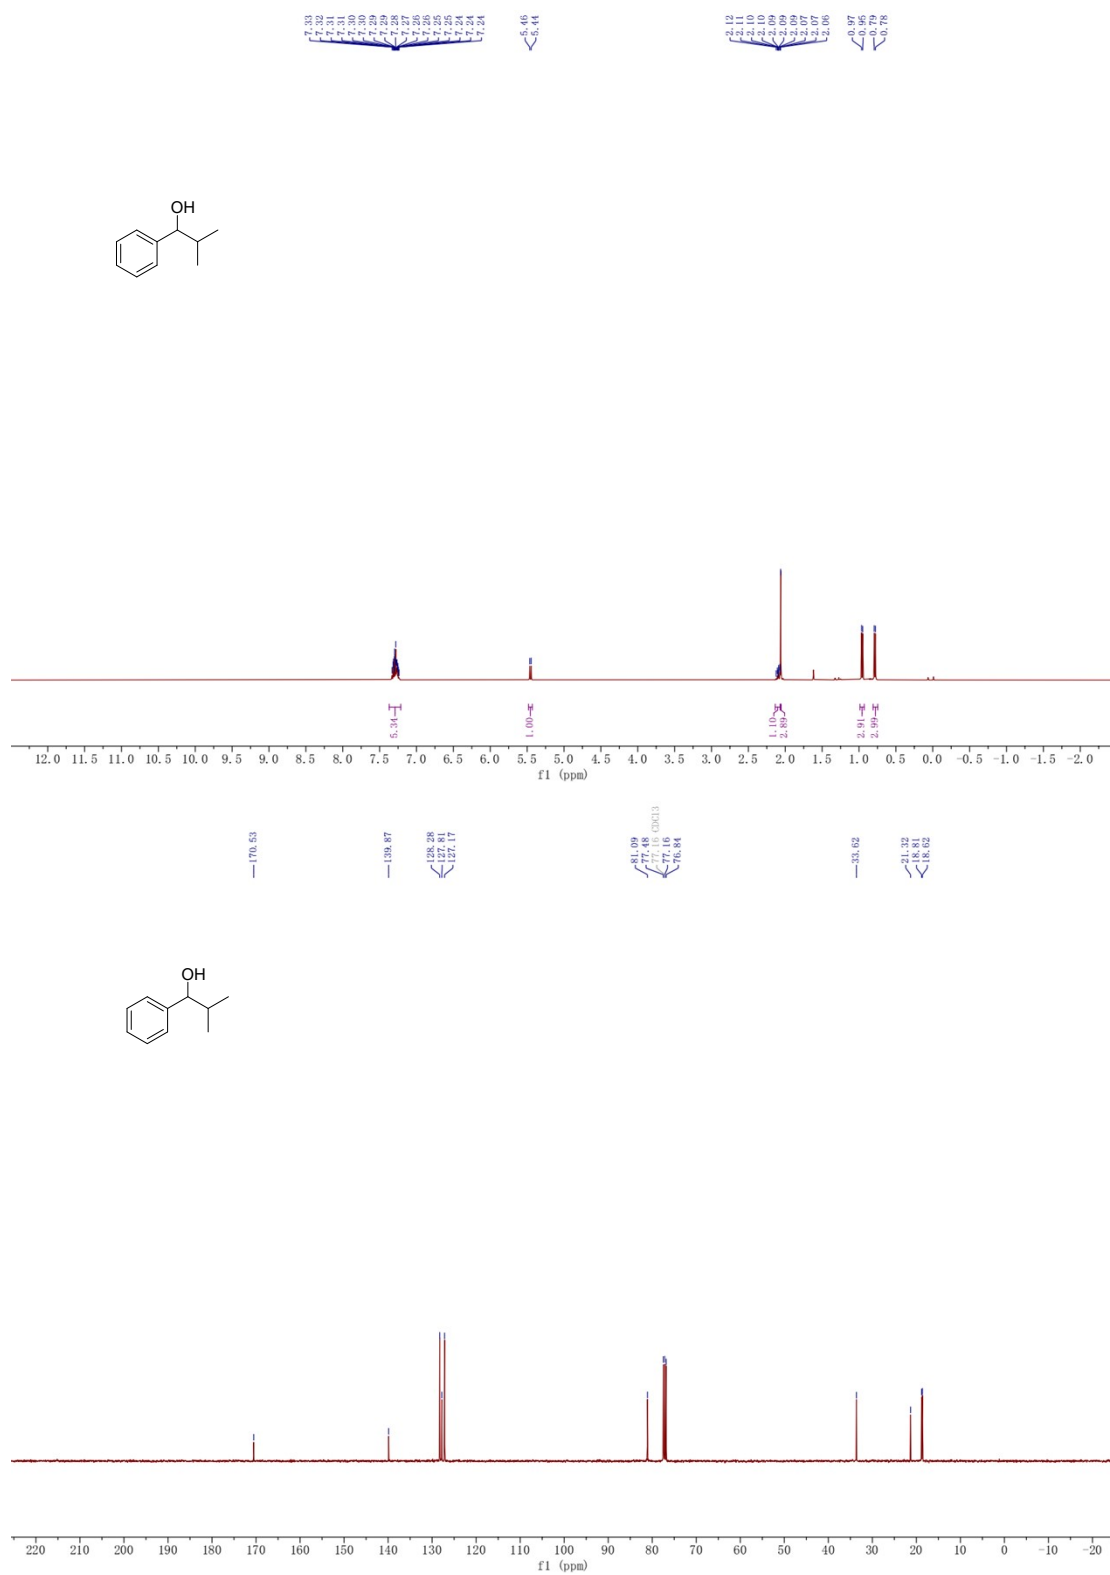

**Figure S36.** <sup>1</sup>H (top) and <sup>13</sup>C (bottom) NMR spectra of 1-phenylpentyl acetate from 1-phenylpentan-1-ol (table 5, entry 4).



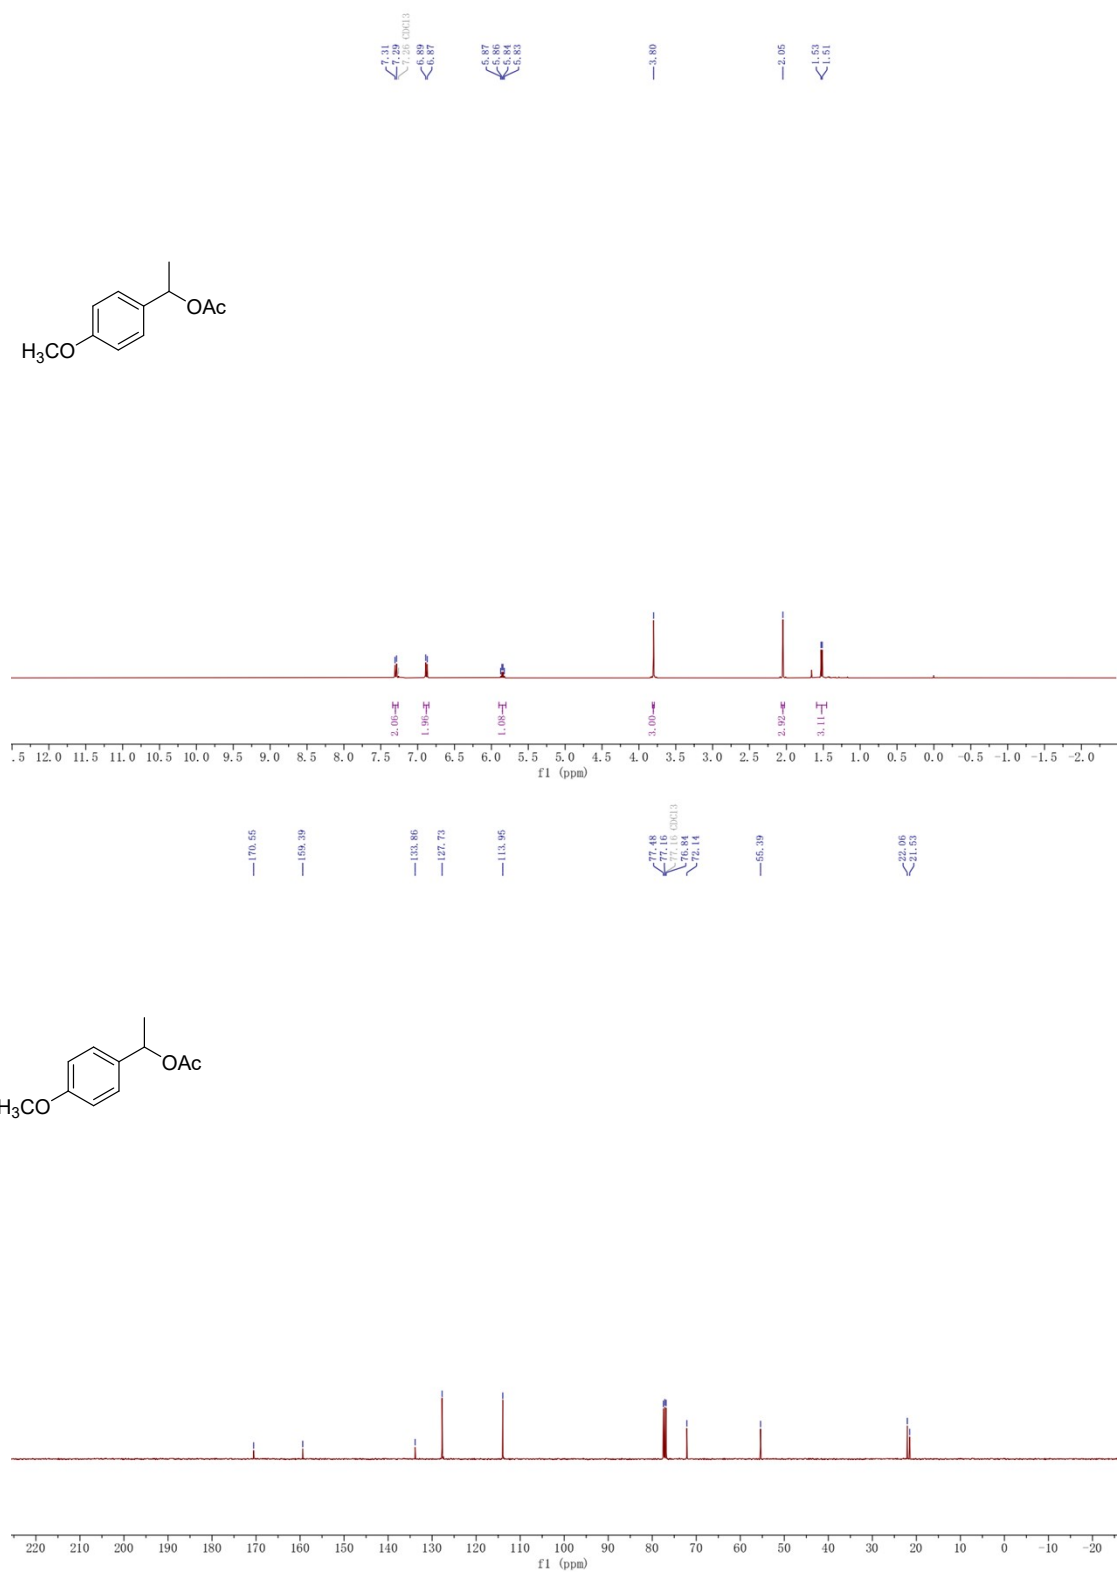

**Figure S37. <sup>1</sup>H (top) and <sup>13</sup>C (bottom) NMR spectra of 1-(4-methoxyphenyl)ethyl acetate from 1-(4-methoxyphenyl)ethan-1-ol (table 5, entry 5).**

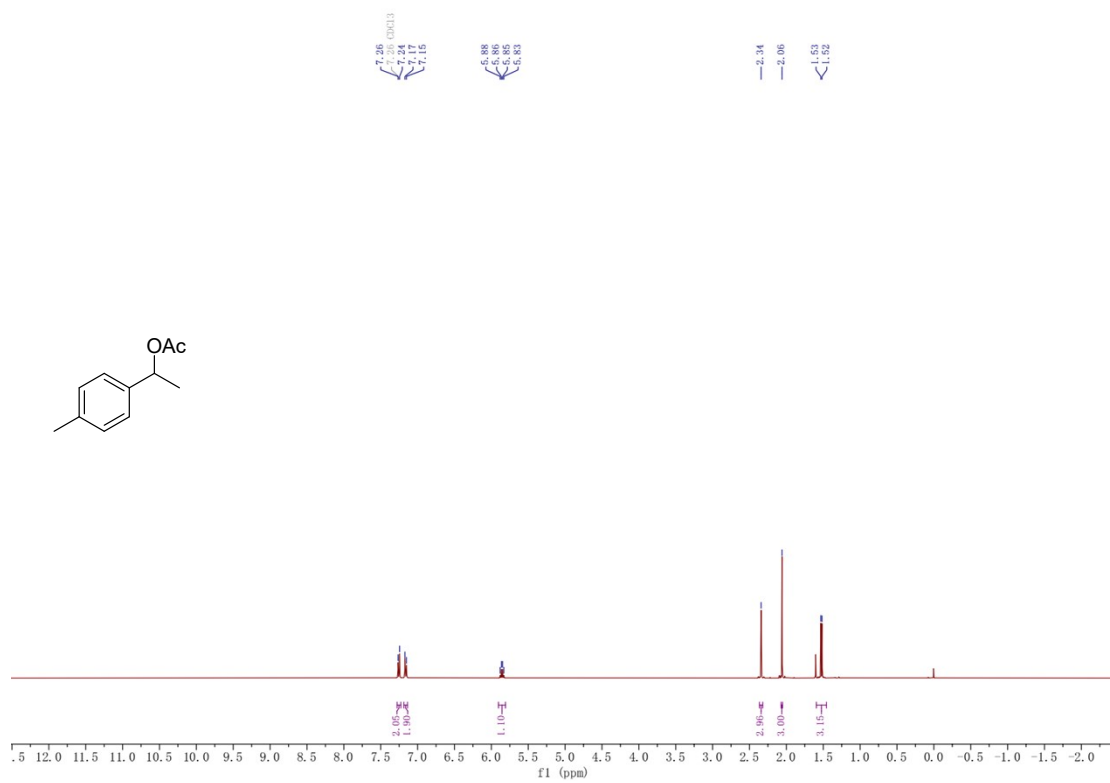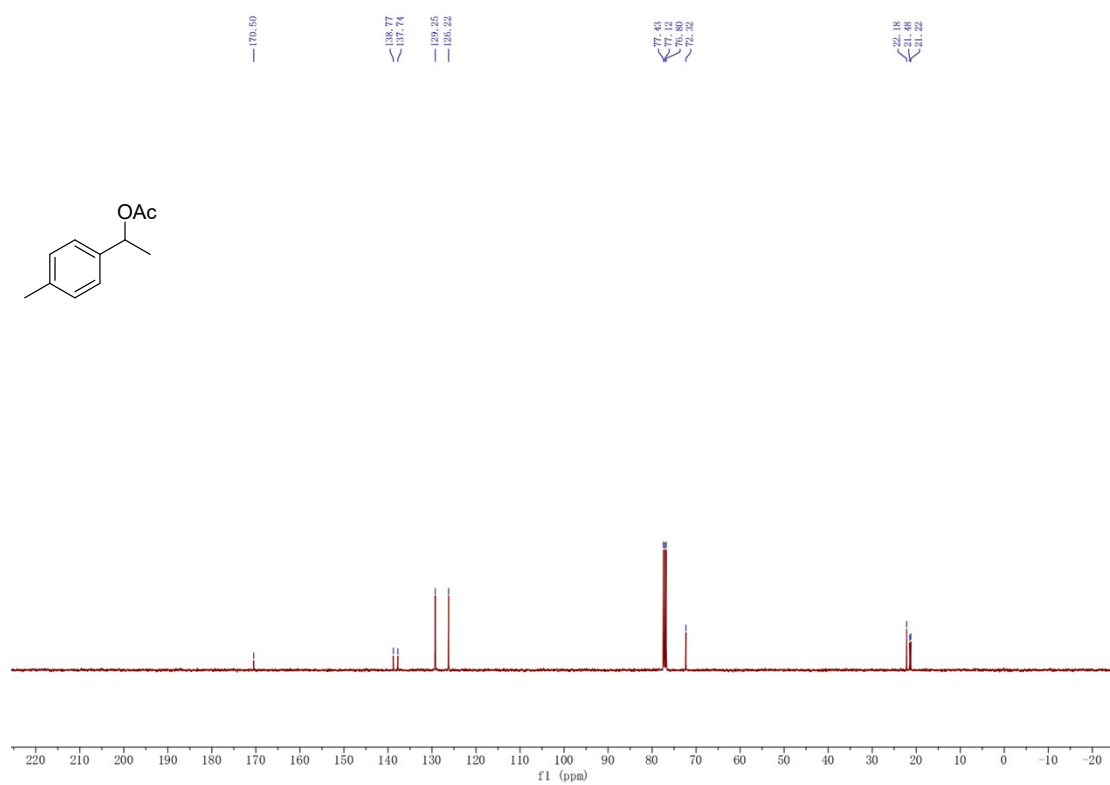

**Figure S38.** <sup>1</sup>H (top) and <sup>13</sup>C (bottom) NMR spectra of 1-(p-tolyl)ethyl acetate from 1-(p-tolyl)ethan-1-ol (table 5, entry 6).

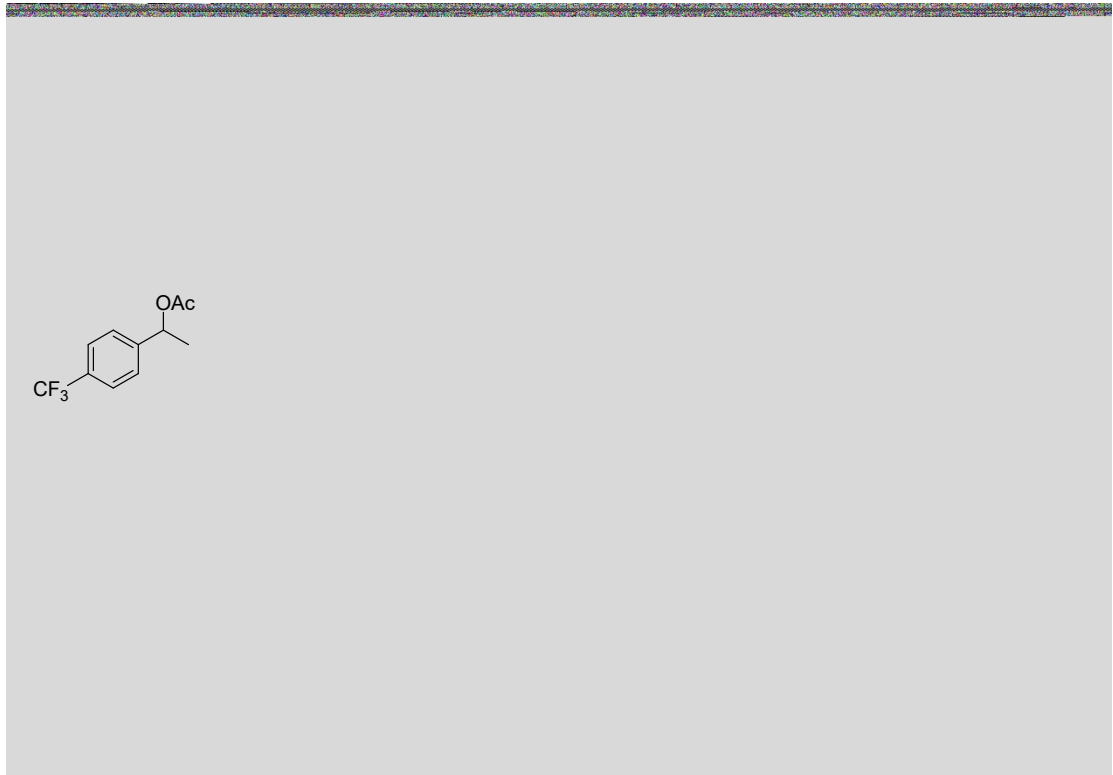

— 129.49 —

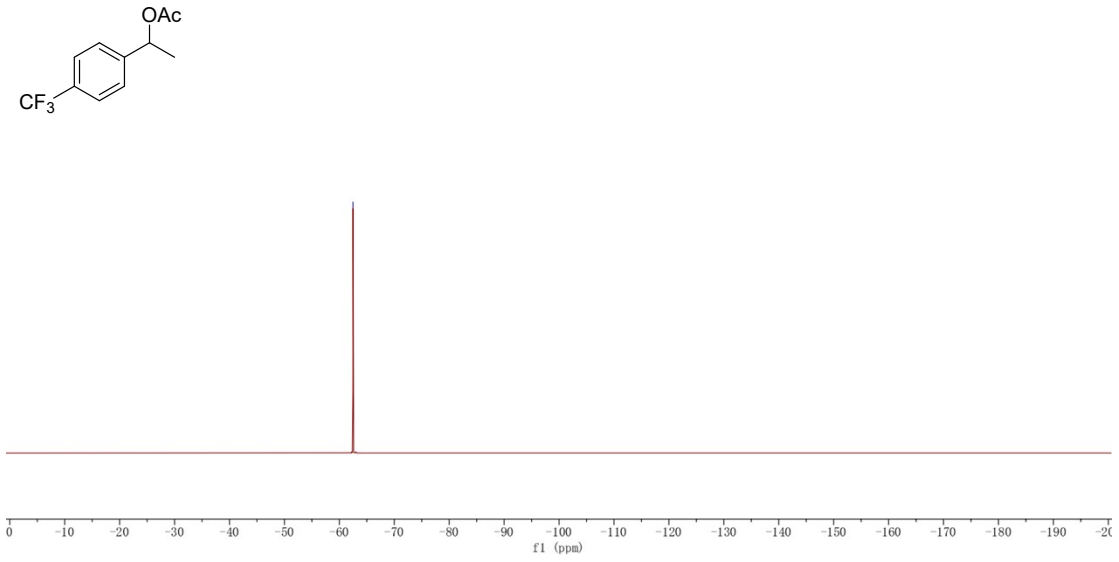

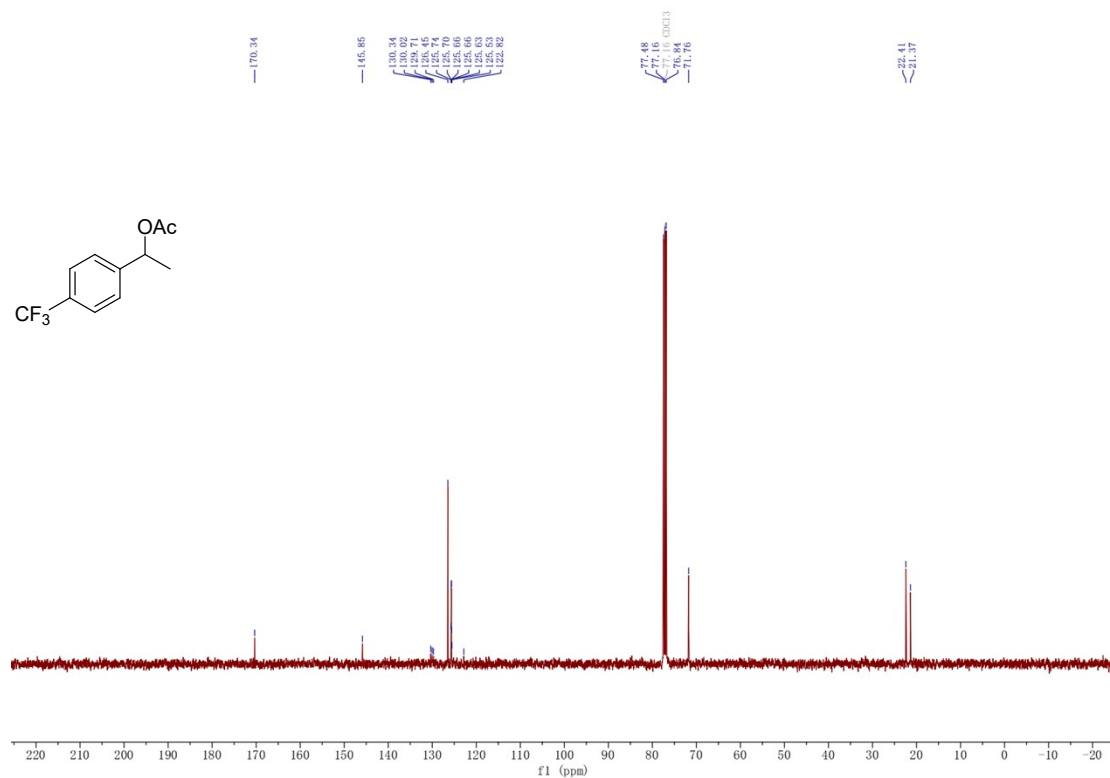

**Figure S39.** <sup>1</sup>H (top) , <sup>19</sup>F(middle) and <sup>13</sup>C (bottom) NMR spectra of 1-(4-(trifluoromethyl)phenyl)ethyl acetate from 1-(4-(trifluoromethyl)phenyl)ethan-1-ol(table 5, entry 7).

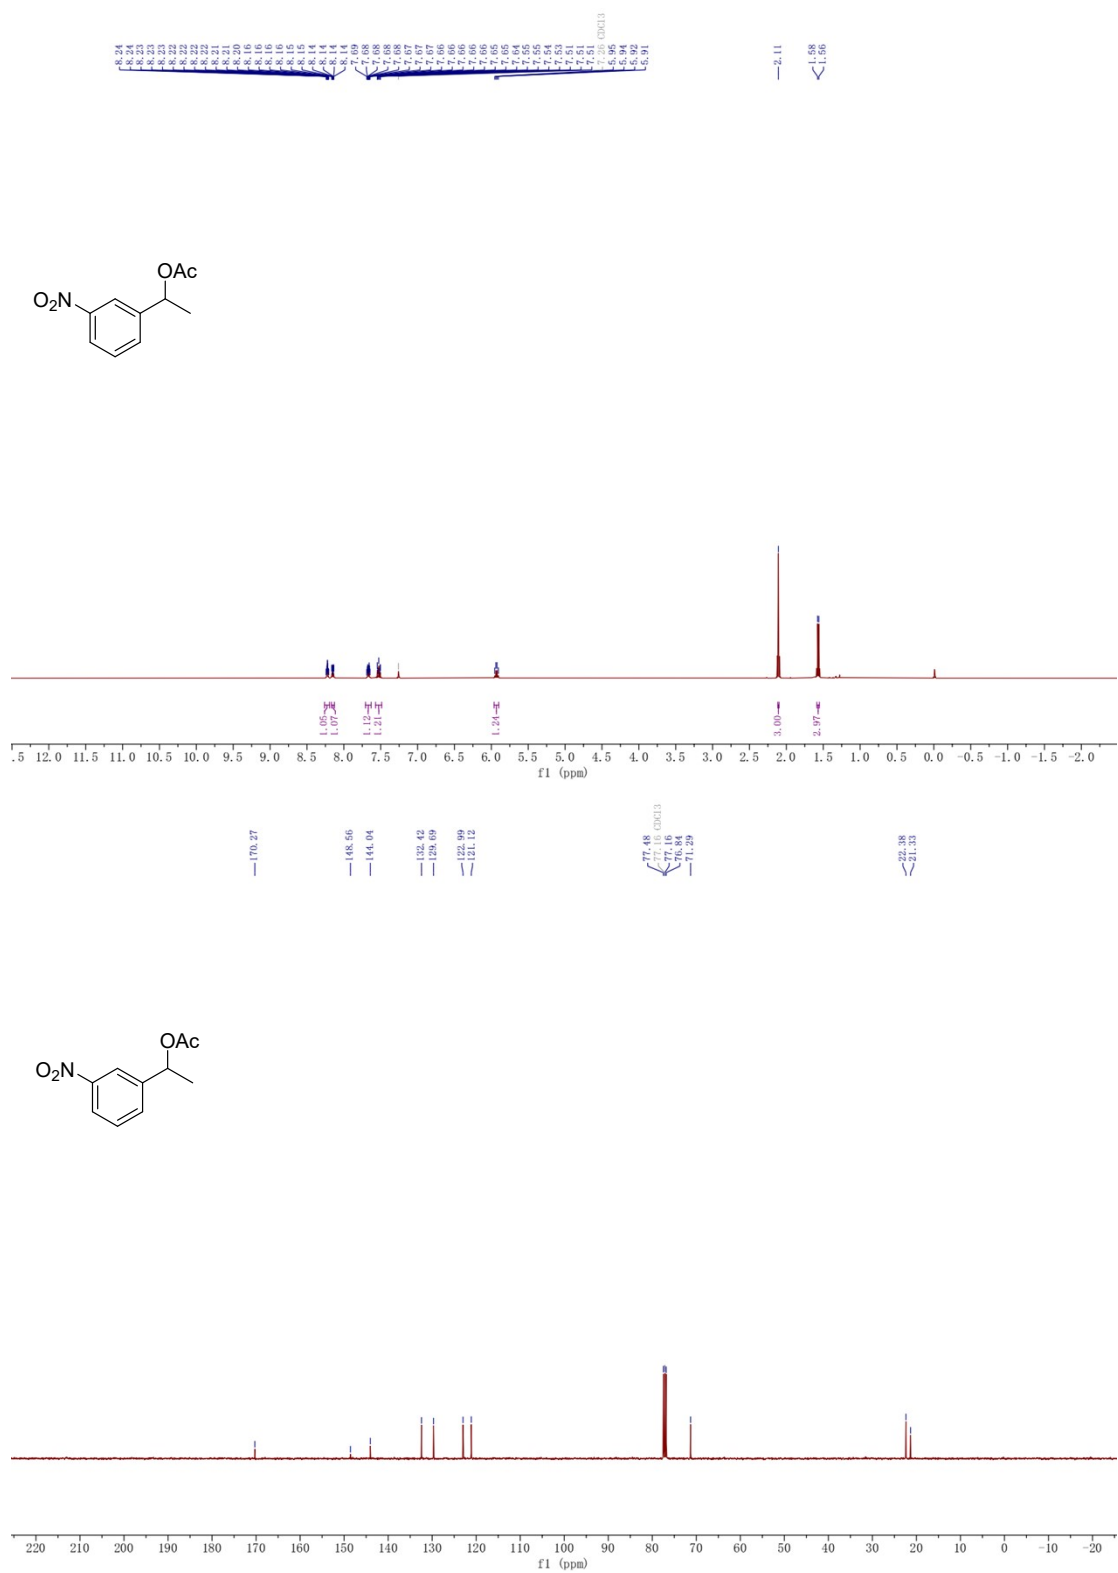

**Figure S40.** <sup>1</sup>H (top) and <sup>13</sup>C (bottom) NMR spectra of 1-(3-nitrophenyl)ethyl acetate from 1-(3-nitrophenyl)ethan-1-ol (table 5, entry 8).

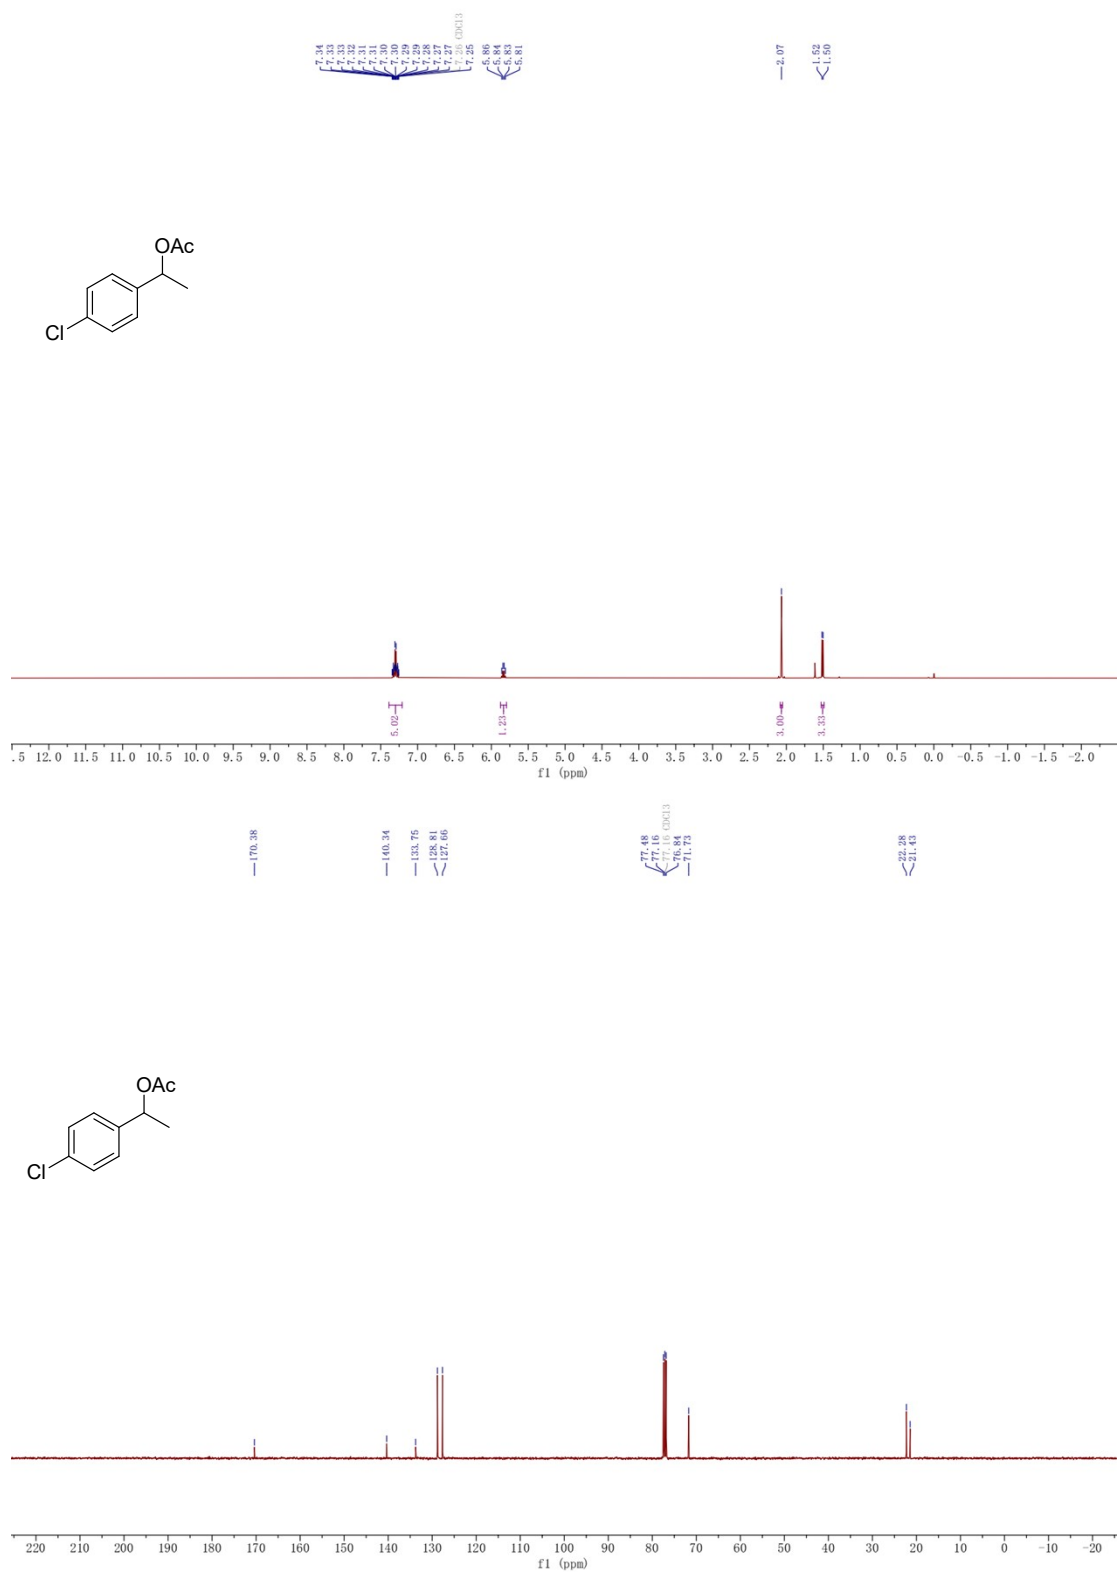

**Figure S41.** <sup>1</sup>H (top) and <sup>13</sup>C (bottom) NMR spectra of 1-(4-chlorophenyl)ethyl acetate from 1-(4-chlorophenyl)ethan-1-ol (table 5, entry 9).

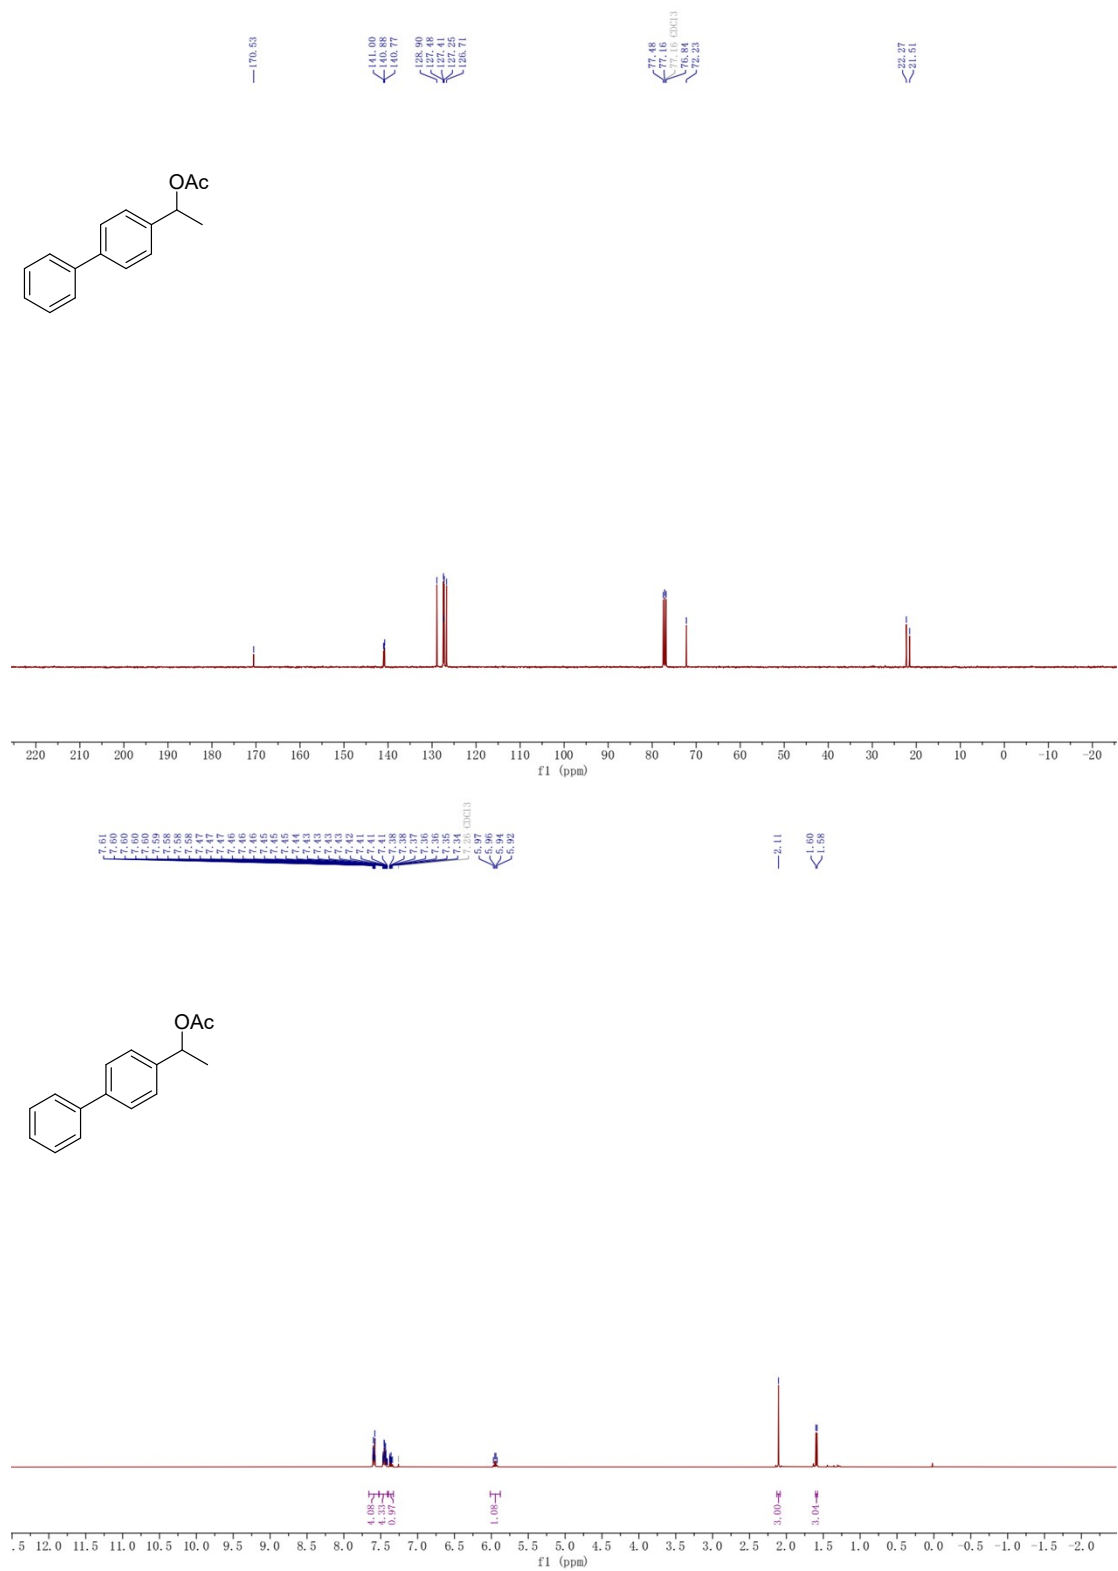

**Figure S42.** <sup>1</sup>H (top) and <sup>13</sup>C (bottom) NMR spectra of 1-([1,1'-biphenyl]-4-yl)ethyl acetate from 1-([1,1'-biphenyl]-4-yl)ethan-1-ol (table 5, entry 10).

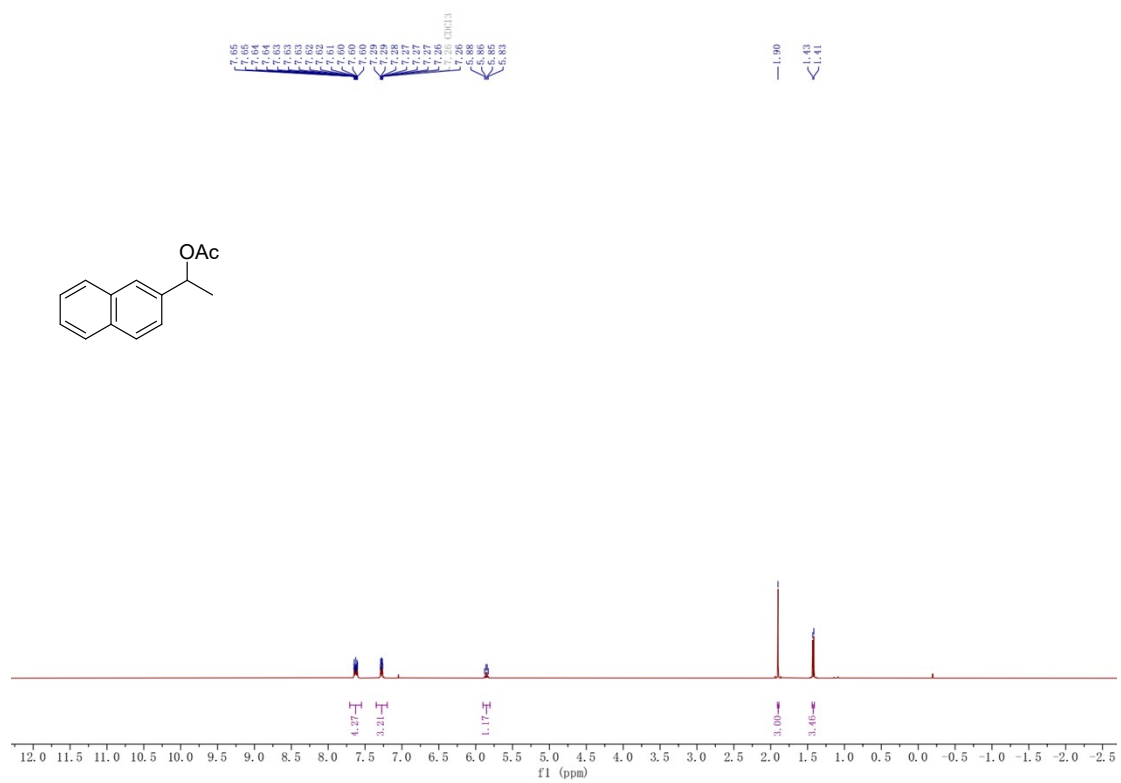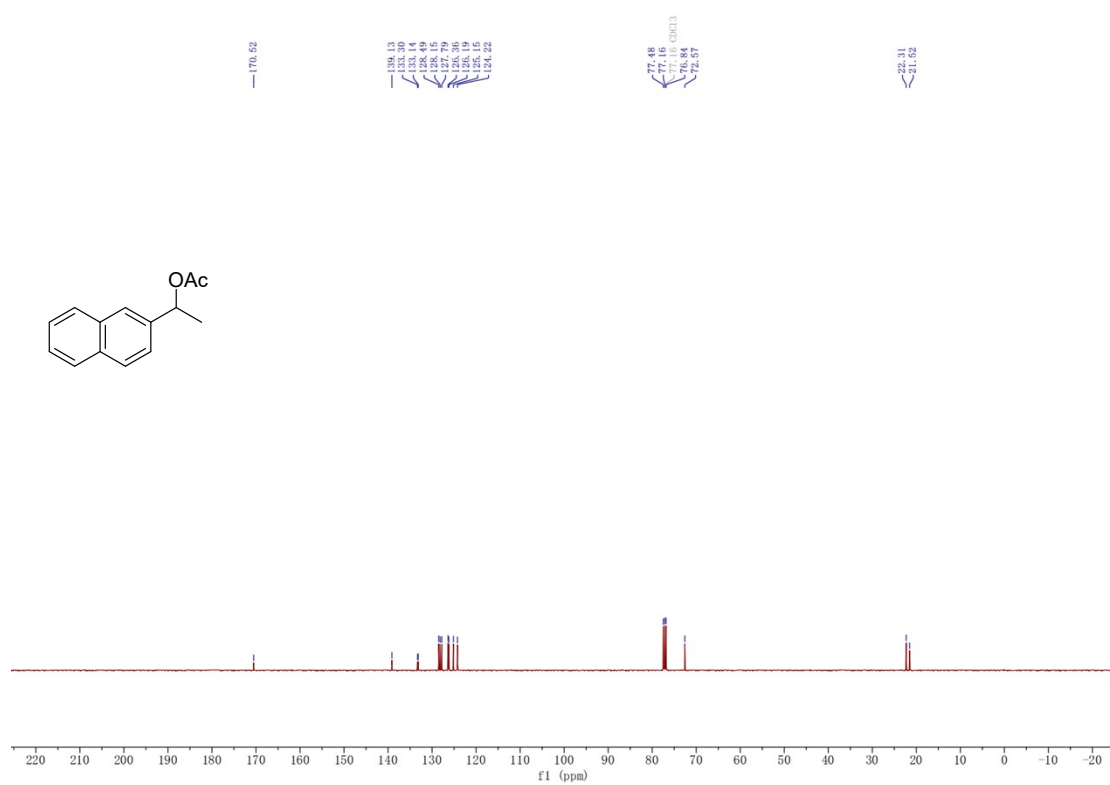

**Figure S43.** <sup>1</sup>H (top) and <sup>13</sup>C (bottom) NMR spectra of 1-(naphthalen-2-yl)ethyl acetate from 1-(naphthalen-2-yl)ethan-1-ol (table 5, entry 11).



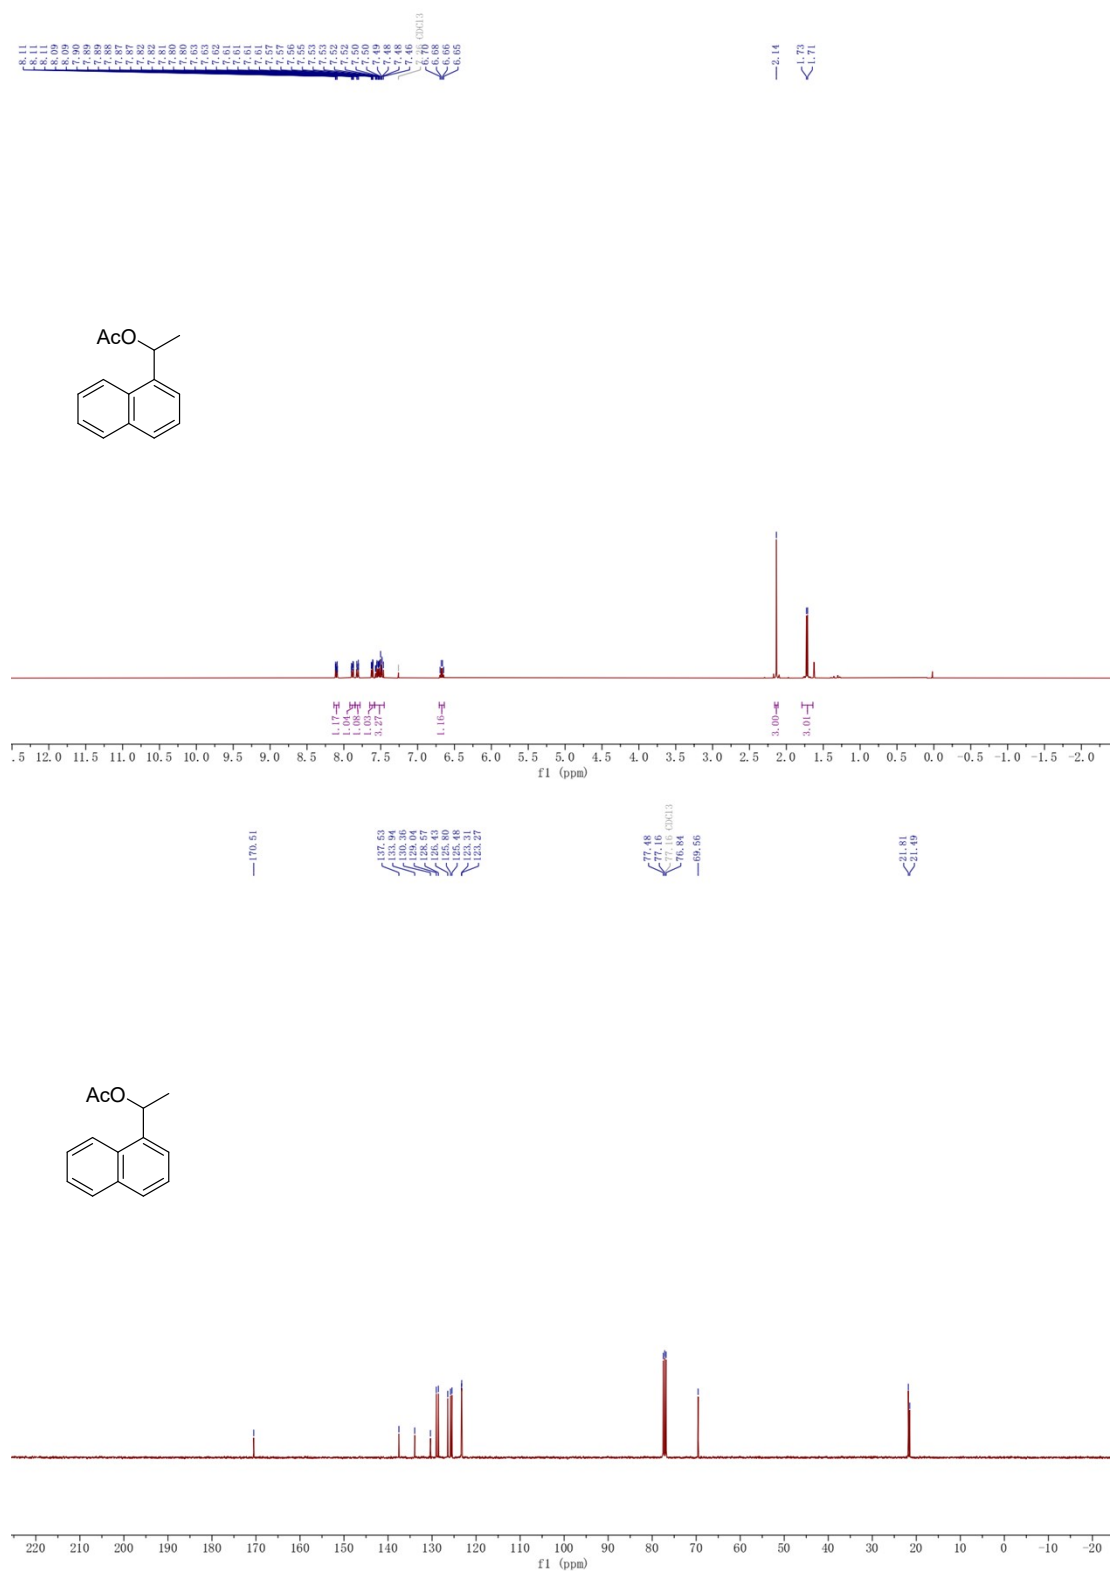

Figure S44.  $^1\text{H}$  (top) and  $^{13}\text{C}$  (bottom) NMR spectra of 1-(naphthalen-1-yl)ethyl acetate from 1-(naphthalen-1-yl)ethan-1-ol(table 5, entry 12).

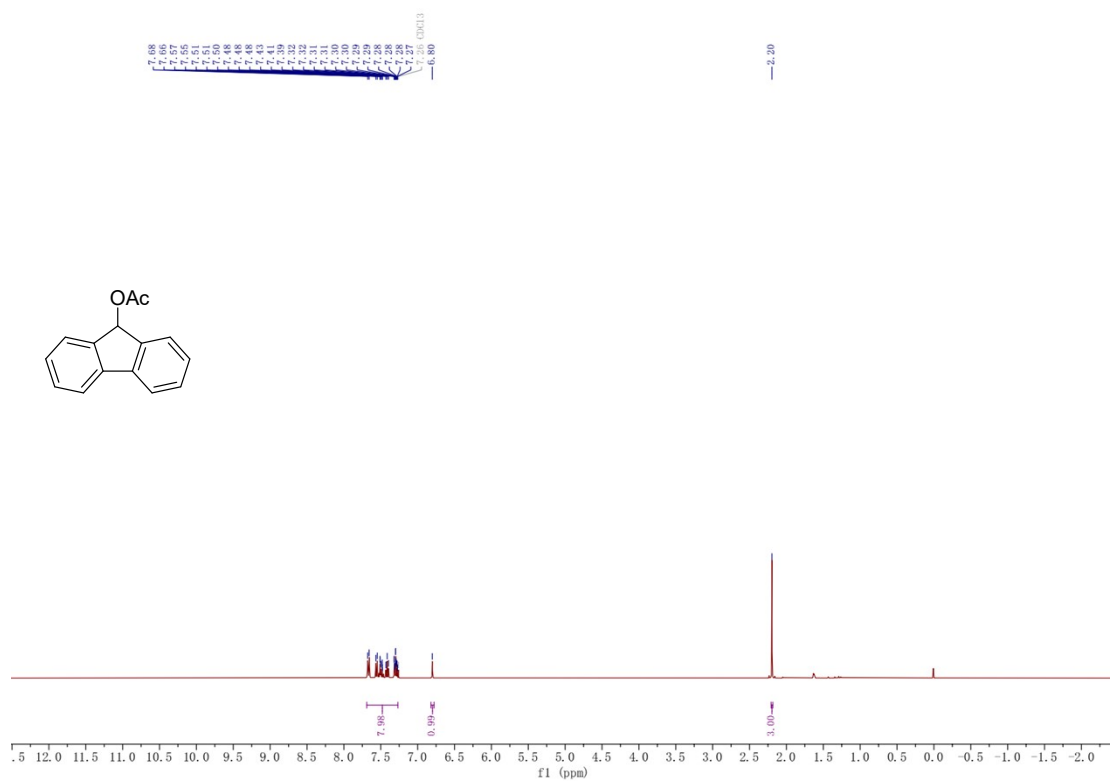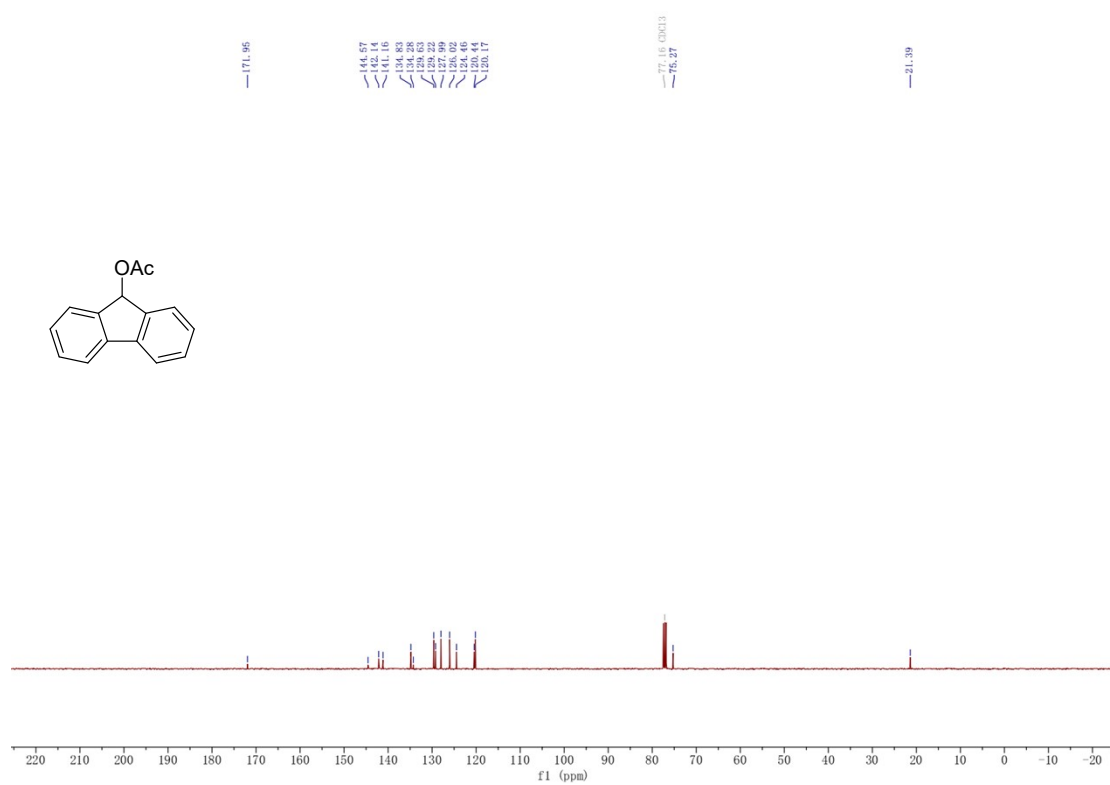

**Figure S45. <sup>1</sup>H (top) and <sup>13</sup>C (bottom) NMR spectra of 9H-fluoren-9-yl acetate from 9H-fluoren-9-ol(table 5, entry 13).**

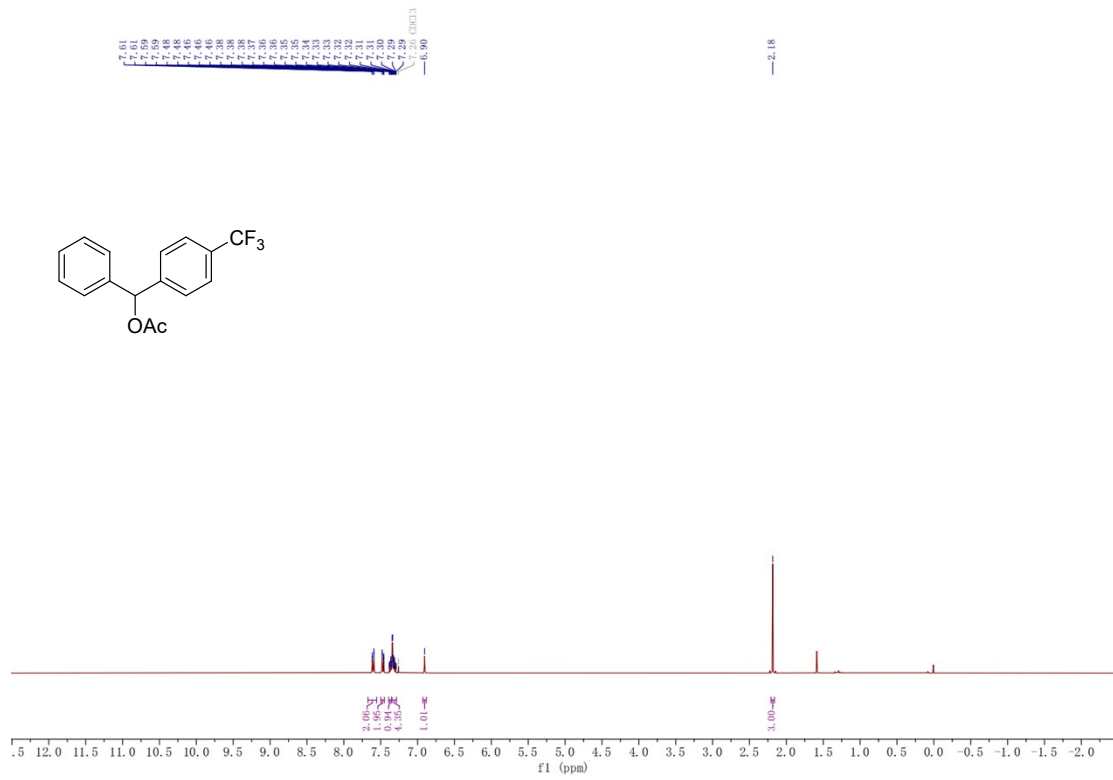

W-3-14

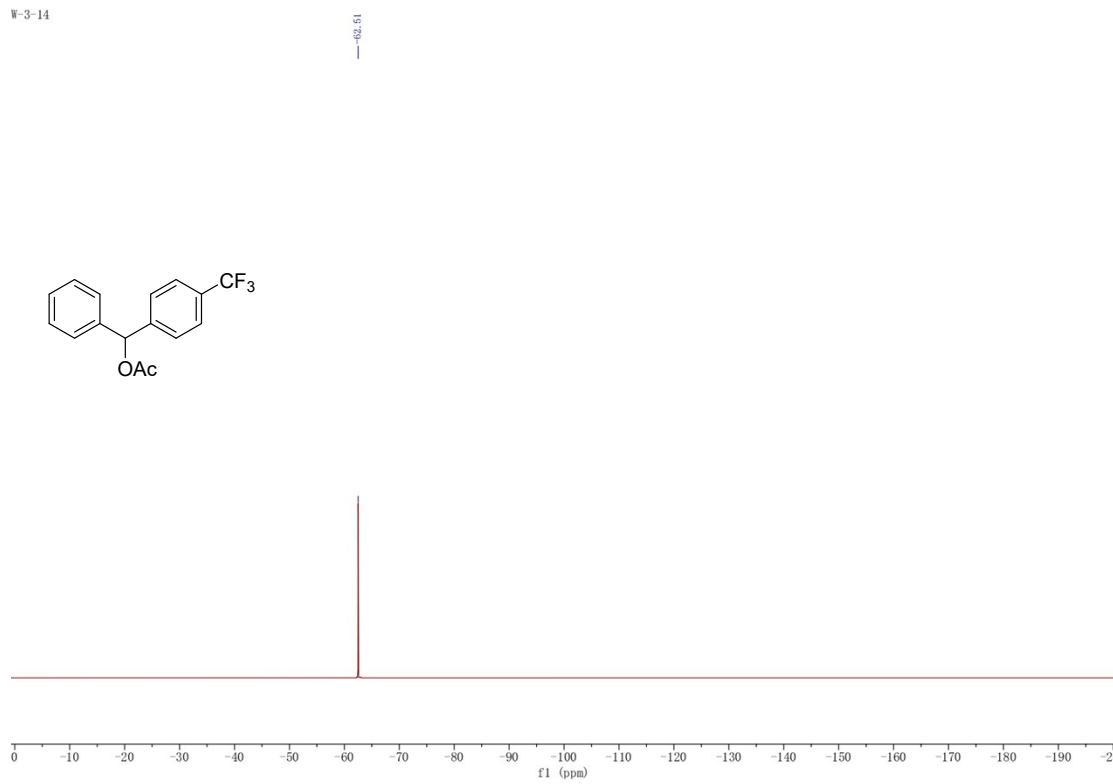

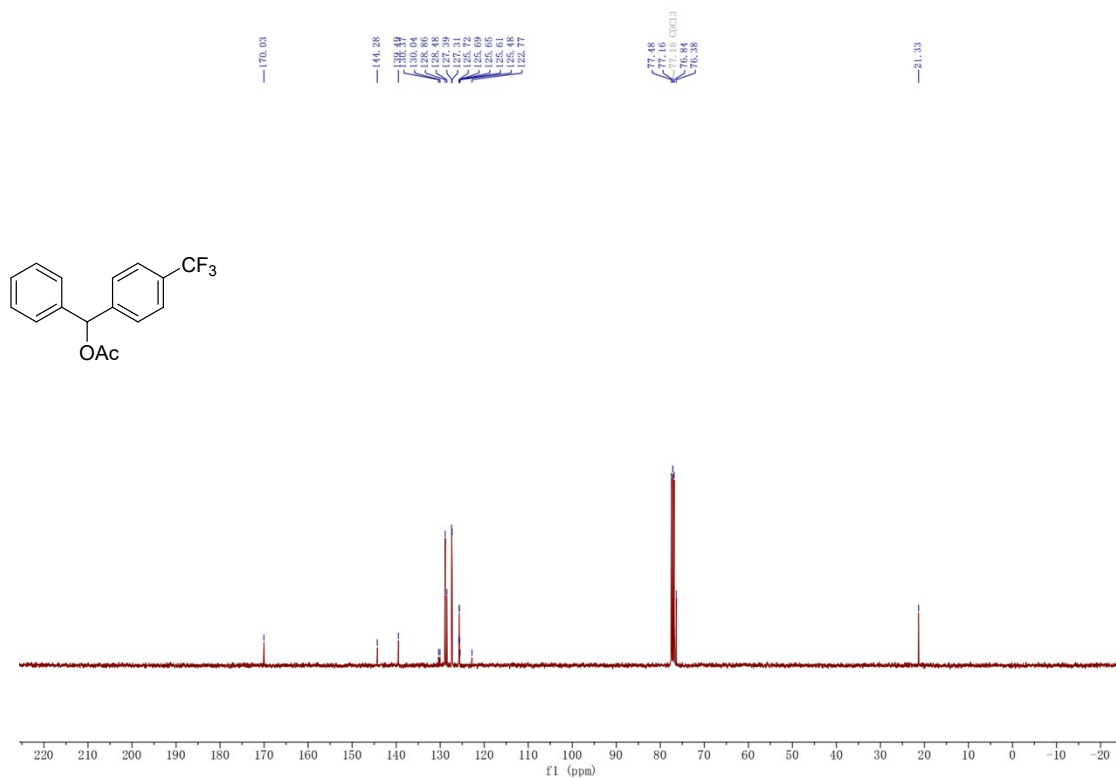

**Figure S46.** <sup>1</sup>H (top) , <sup>19</sup>F(middle) and <sup>13</sup>C (bottom) NMR spectra of phenyl(4-(trifluoromethyl)phenyl)methyl acetate from phenyl(4-(trifluoromethyl)phenyl)methanol(table 5, entry 14).

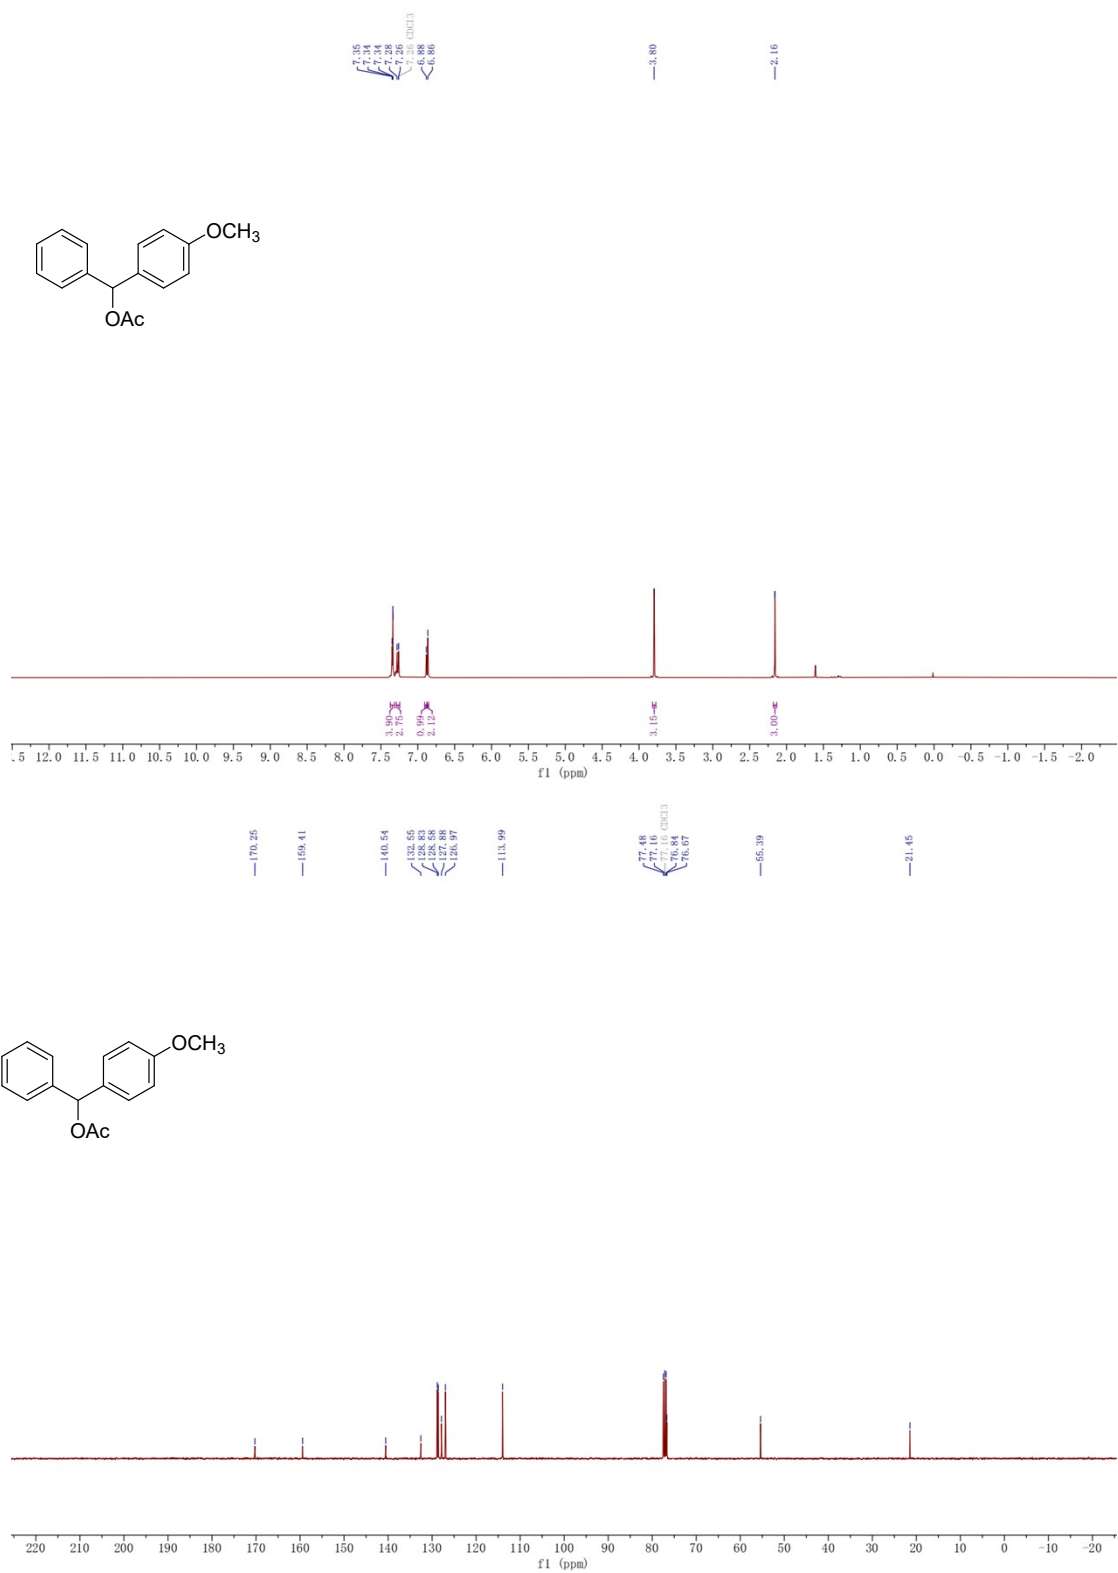

**Figure S47.** <sup>1</sup>H (top) and <sup>13</sup>C (bottom) NMR spectra of (4-methoxyphenyl)(phenyl)methyl acetate from (4-methoxyphenyl)(phenyl)methanol (table 5, entry 15).

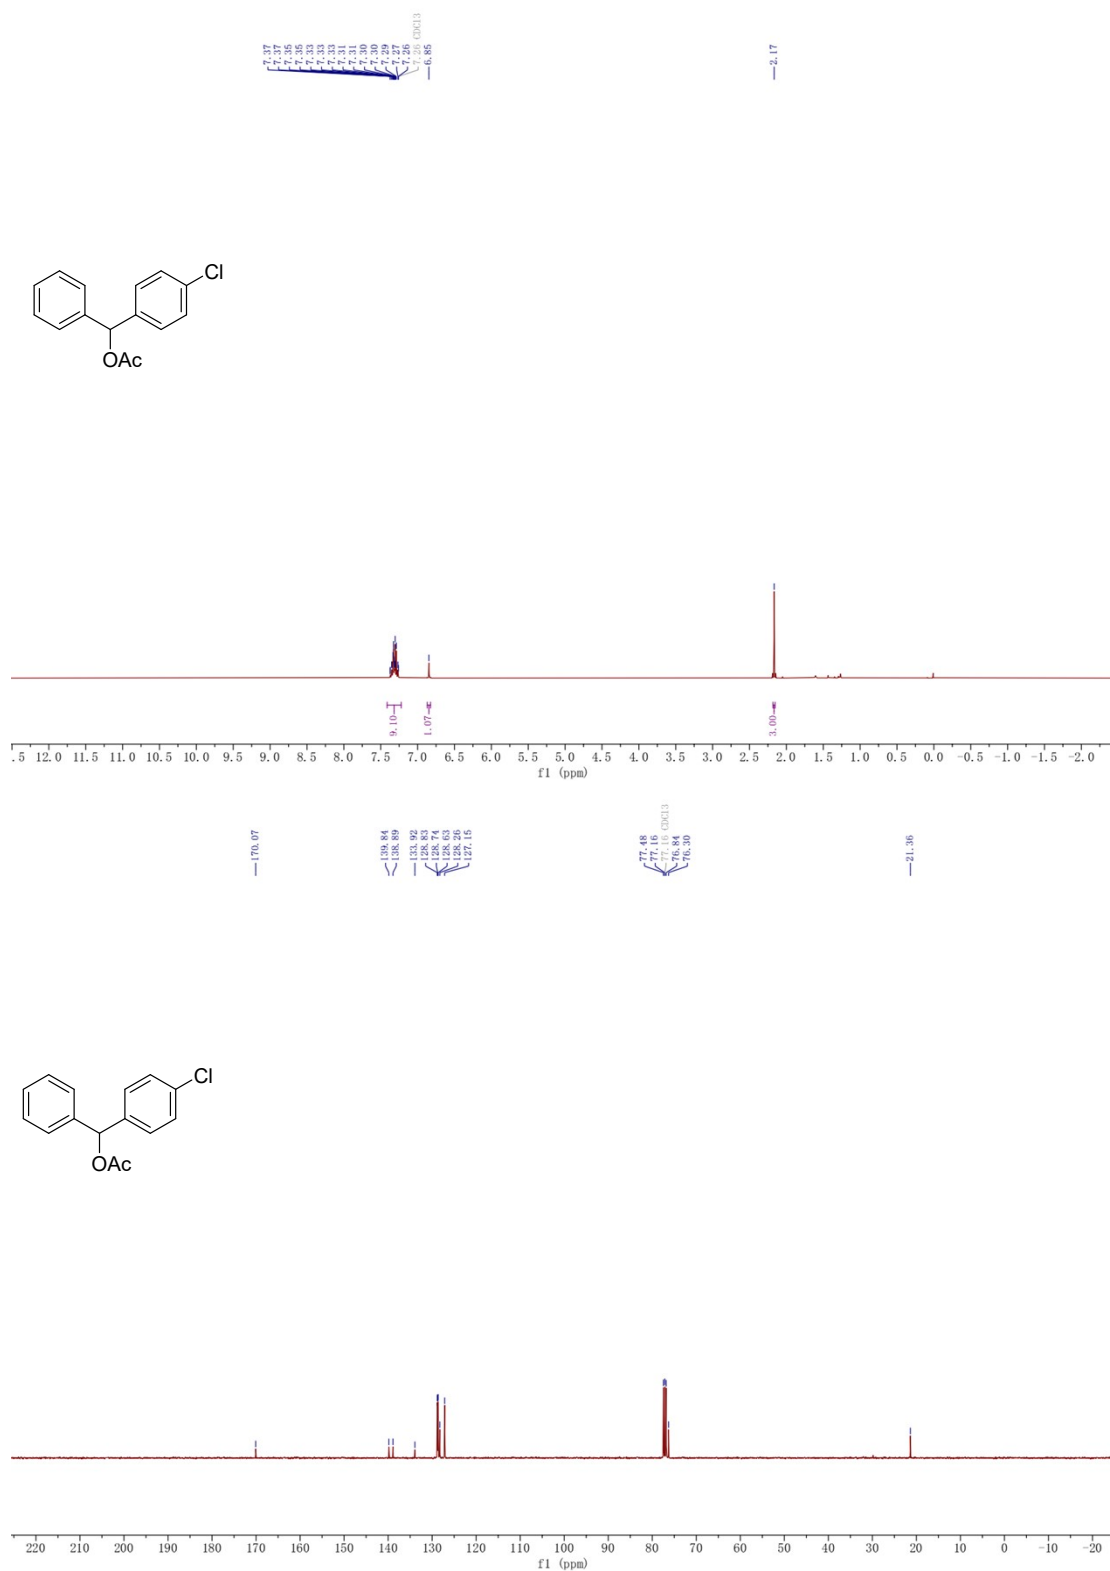

**Figure S48.** <sup>1</sup>H (top) and <sup>13</sup>C (bottom) NMR spectra of (4-chlorophenyl)(phenyl)methyl acetate from (4-chlorophenyl)(phenyl)methanol (table 5, entry 16).

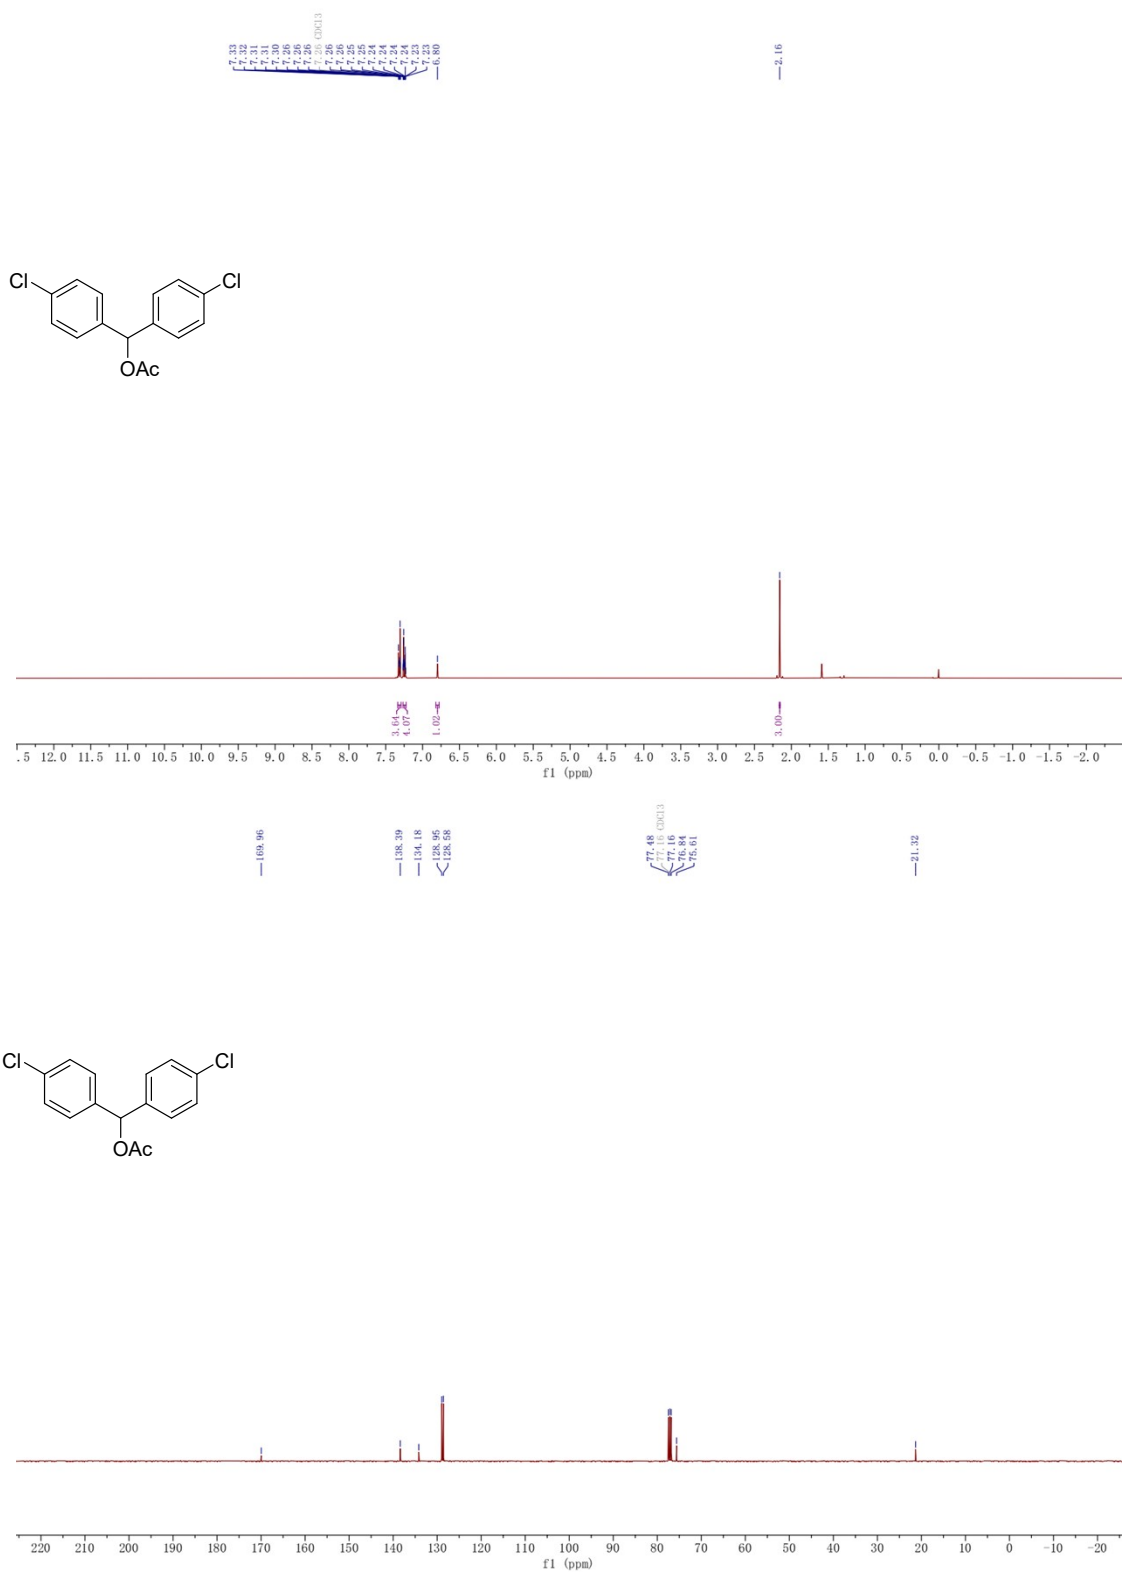

**Figure S49. <sup>1</sup>H (top) and <sup>13</sup>C (bottom) NMR spectra of bis(4-chlorophenyl)methyl acetate from bis(4-chlorophenyl)methanol (table 5, entry 17).**

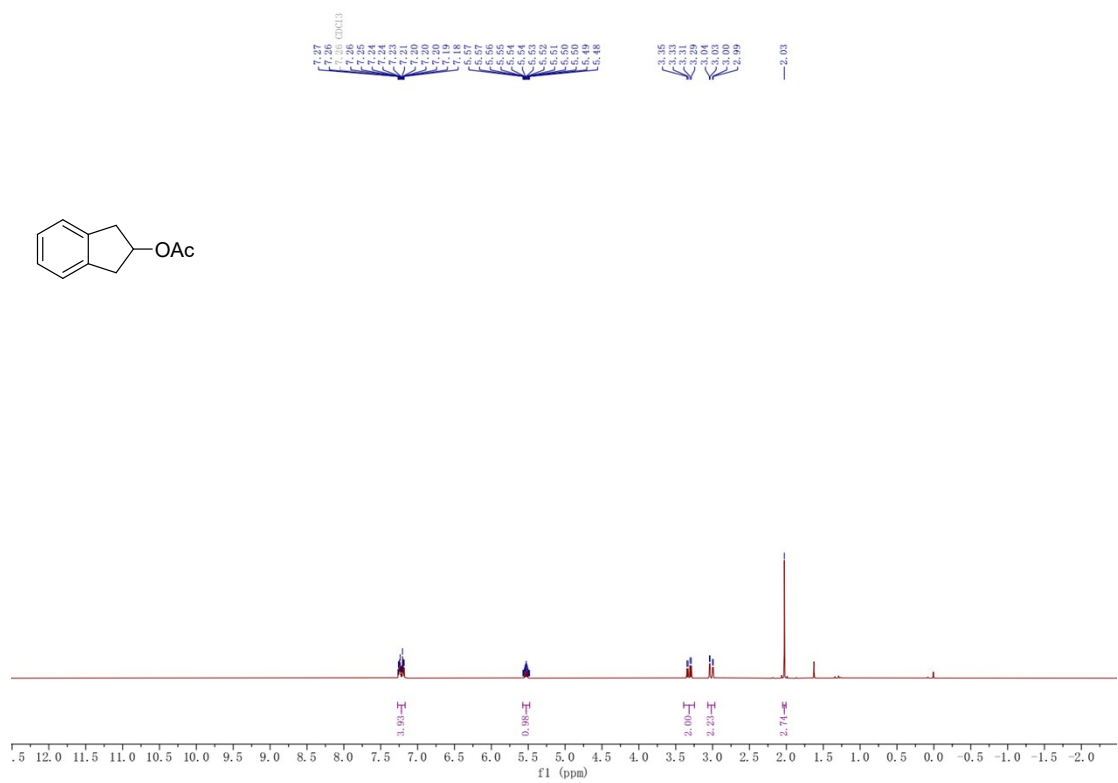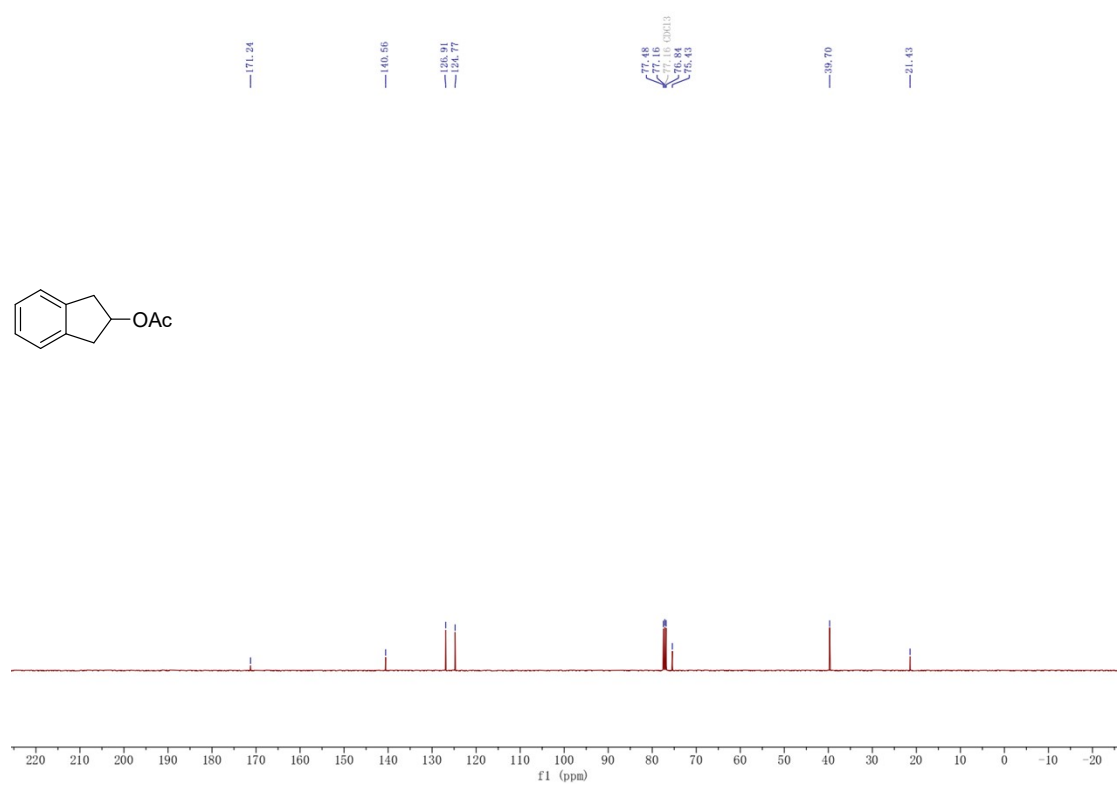

**Figure S50.**  $^1\text{H}$  (top) and  $^{13}\text{C}$  (bottom) NMR spectra of 2,3-dihydro-1H-inden-2-yl acetate from 2,3-dihydro-1H-inden-2-ol (table 5, entry 18).



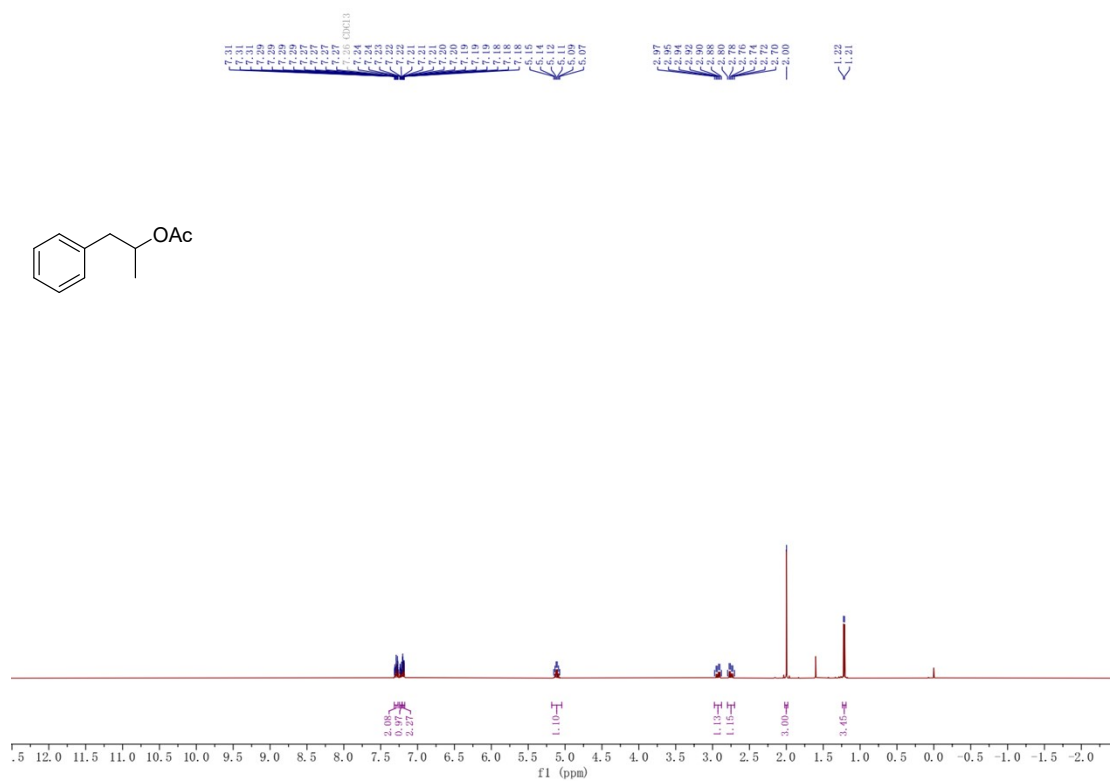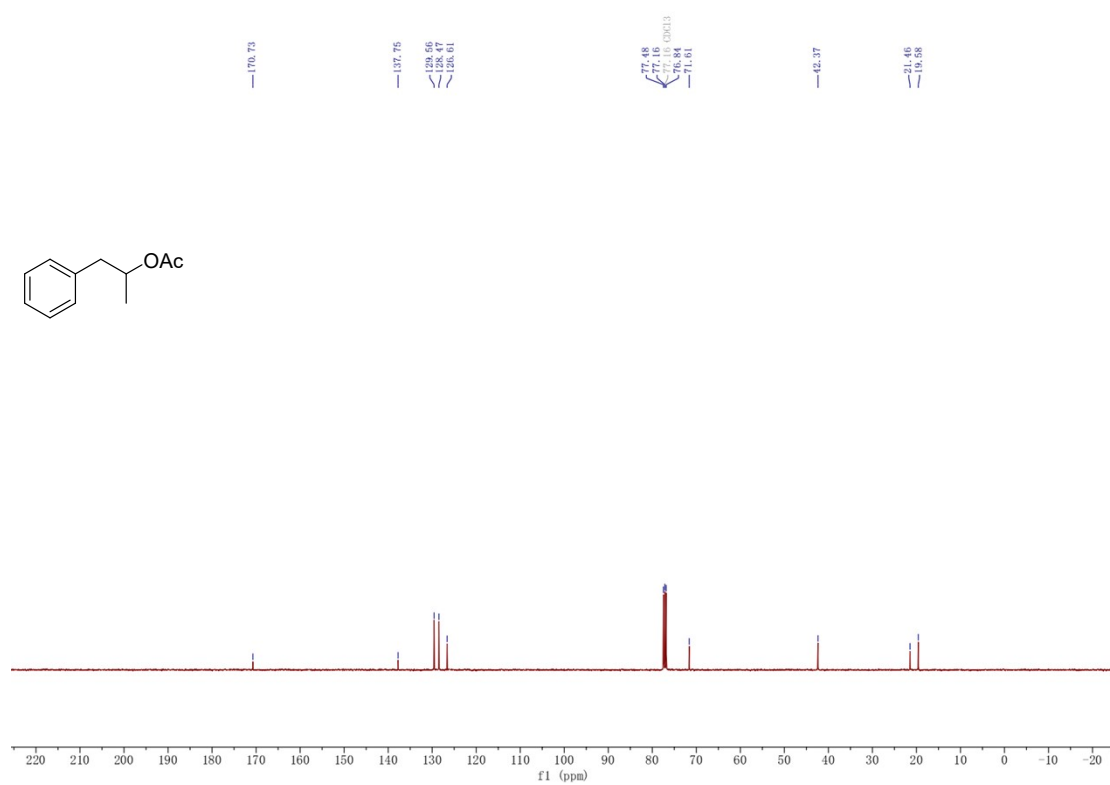

**Figure S51.** <sup>1</sup>H (top) and <sup>13</sup>C (bottom) NMR spectra of 1-phenylpropan-2-yl acetate from 1-phenylpropan-2-ol (table 5, entry 19).

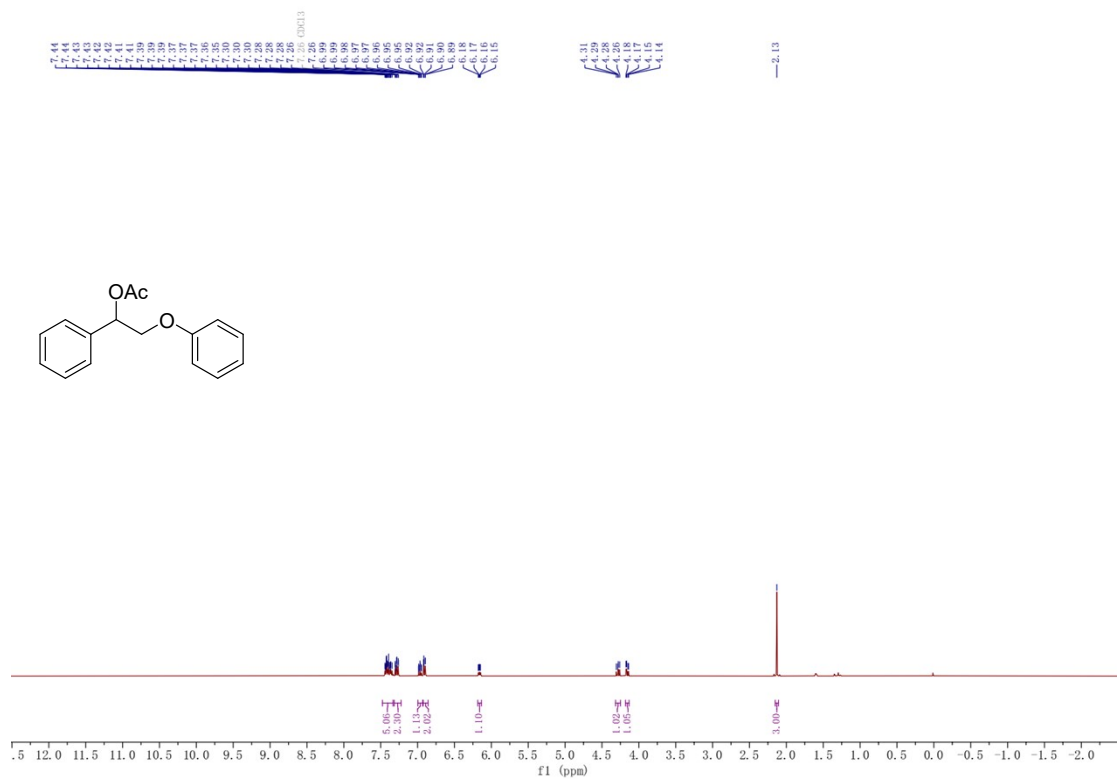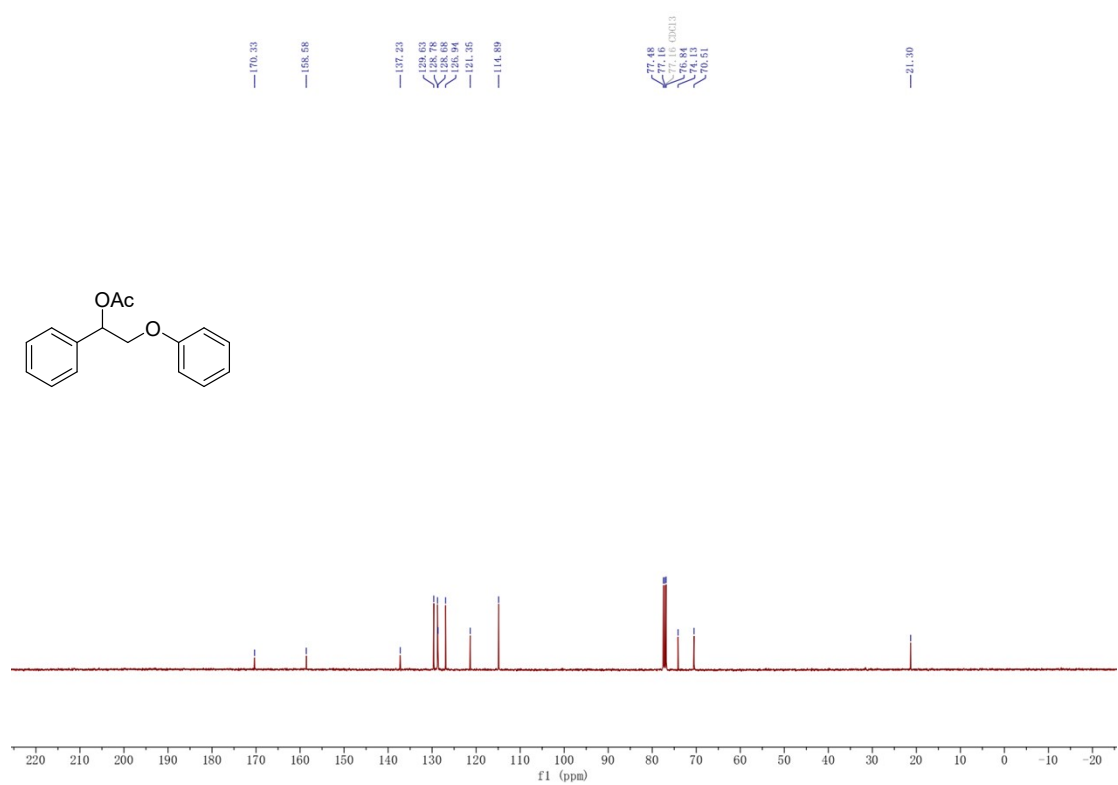

**Figure S52.** <sup>1</sup>H (top) and <sup>13</sup>C (bottom) NMR spectra of 2-phenoxy-1-phenylethyl acetate from 2-phenoxy-1-phenylethan-1-ol (table 5, entry 20).

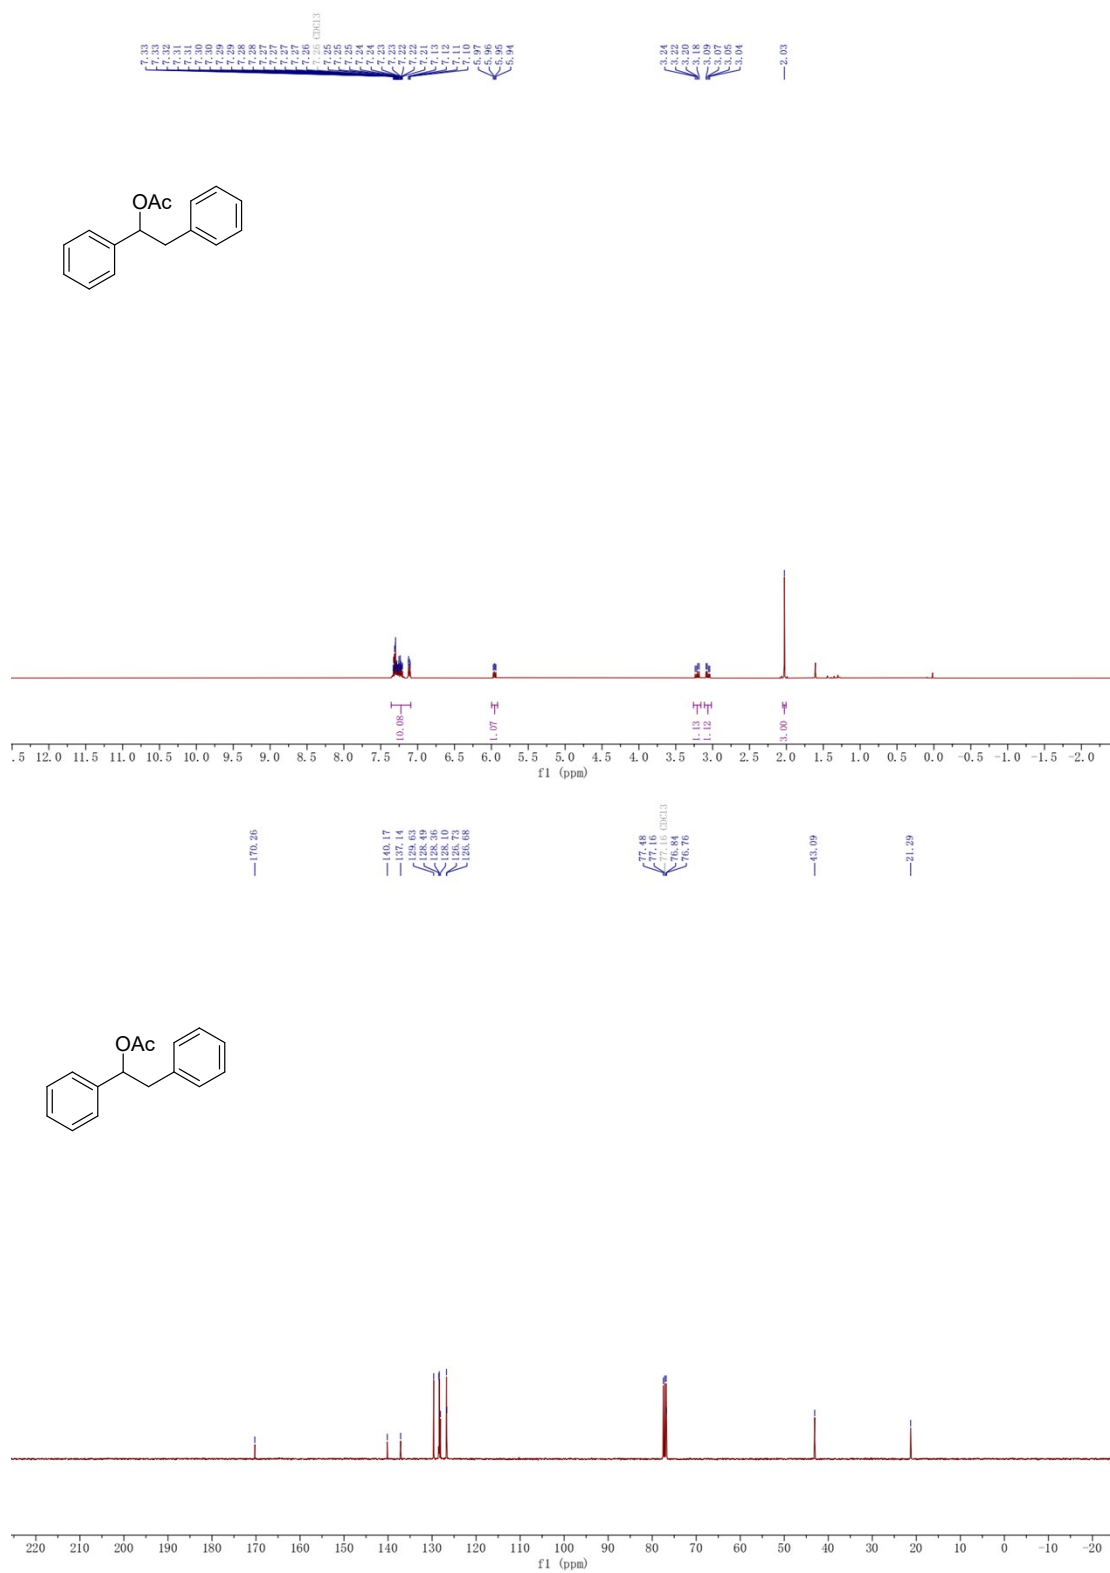

**Figure S53.** <sup>1</sup>H (top) and <sup>13</sup>C (bottom) NMR spectra of 1,2-diphenylethyl acetate from 1,2-diphenylethan-1-ol (table 5, entry 21).

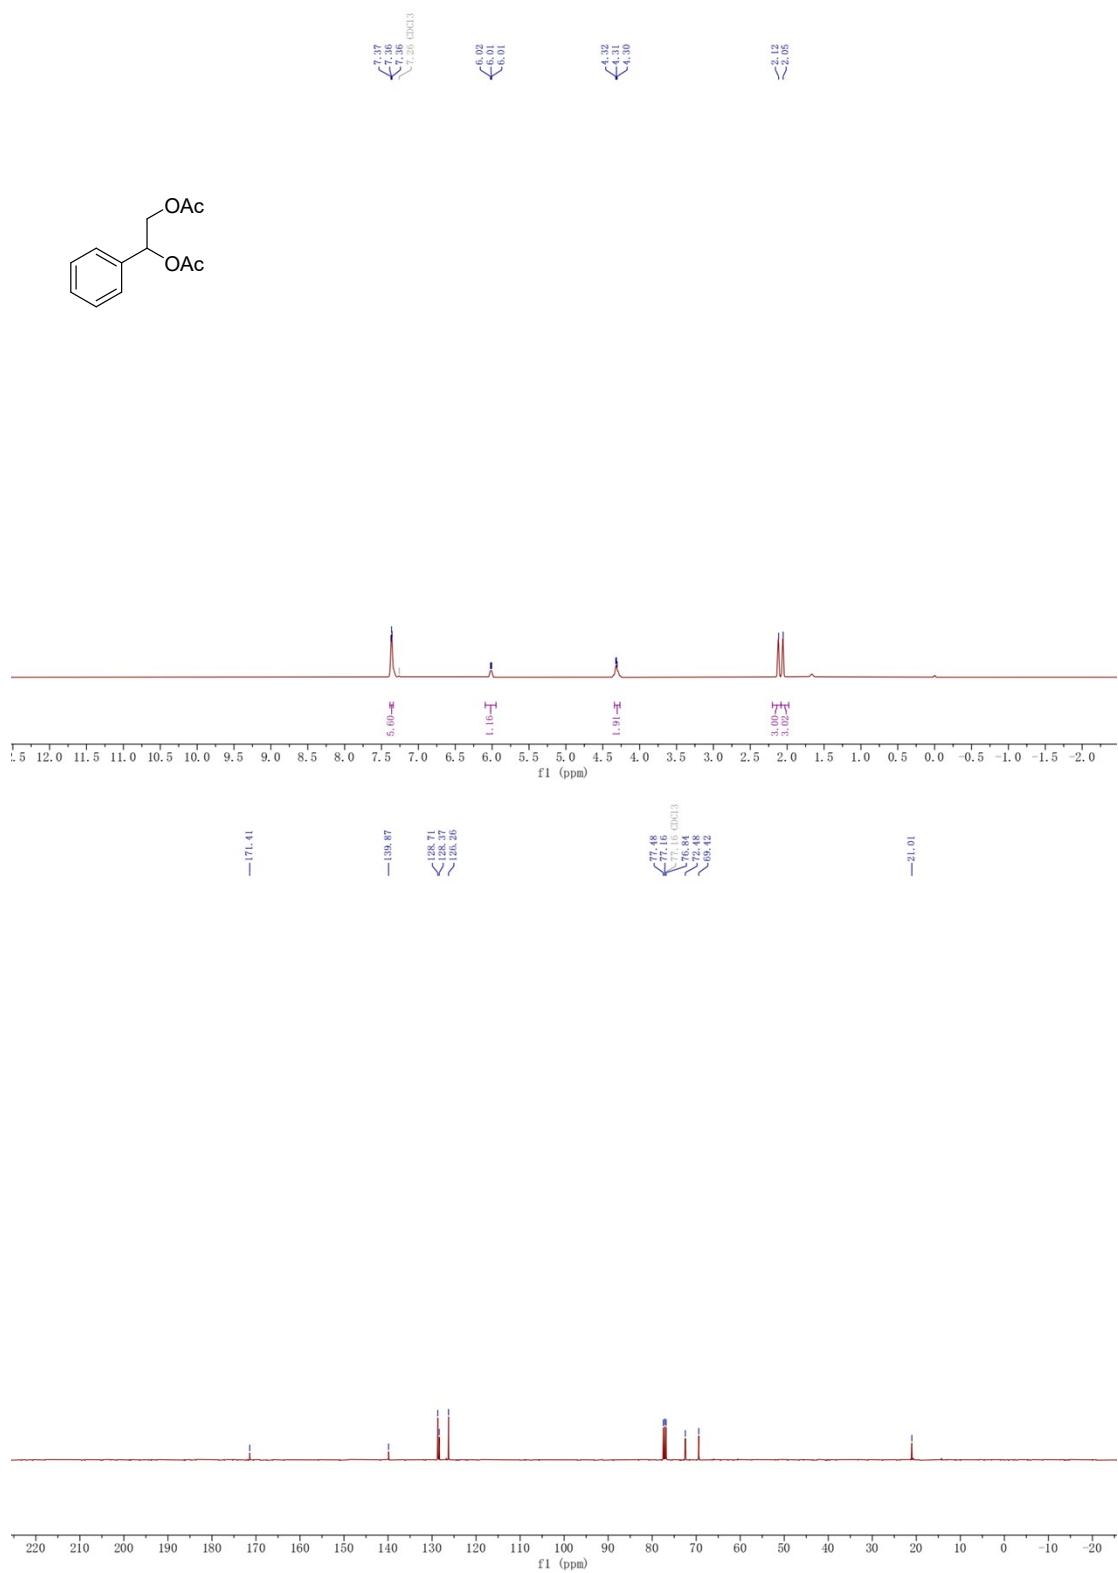

**Figure S54. <sup>1</sup>H (top) and <sup>13</sup>C (bottom) NMR spectra of 1-phenylethane-1,2-diyl diacetate from 1-phenylethane-1,2-diol (table 5, entry 22-1).**

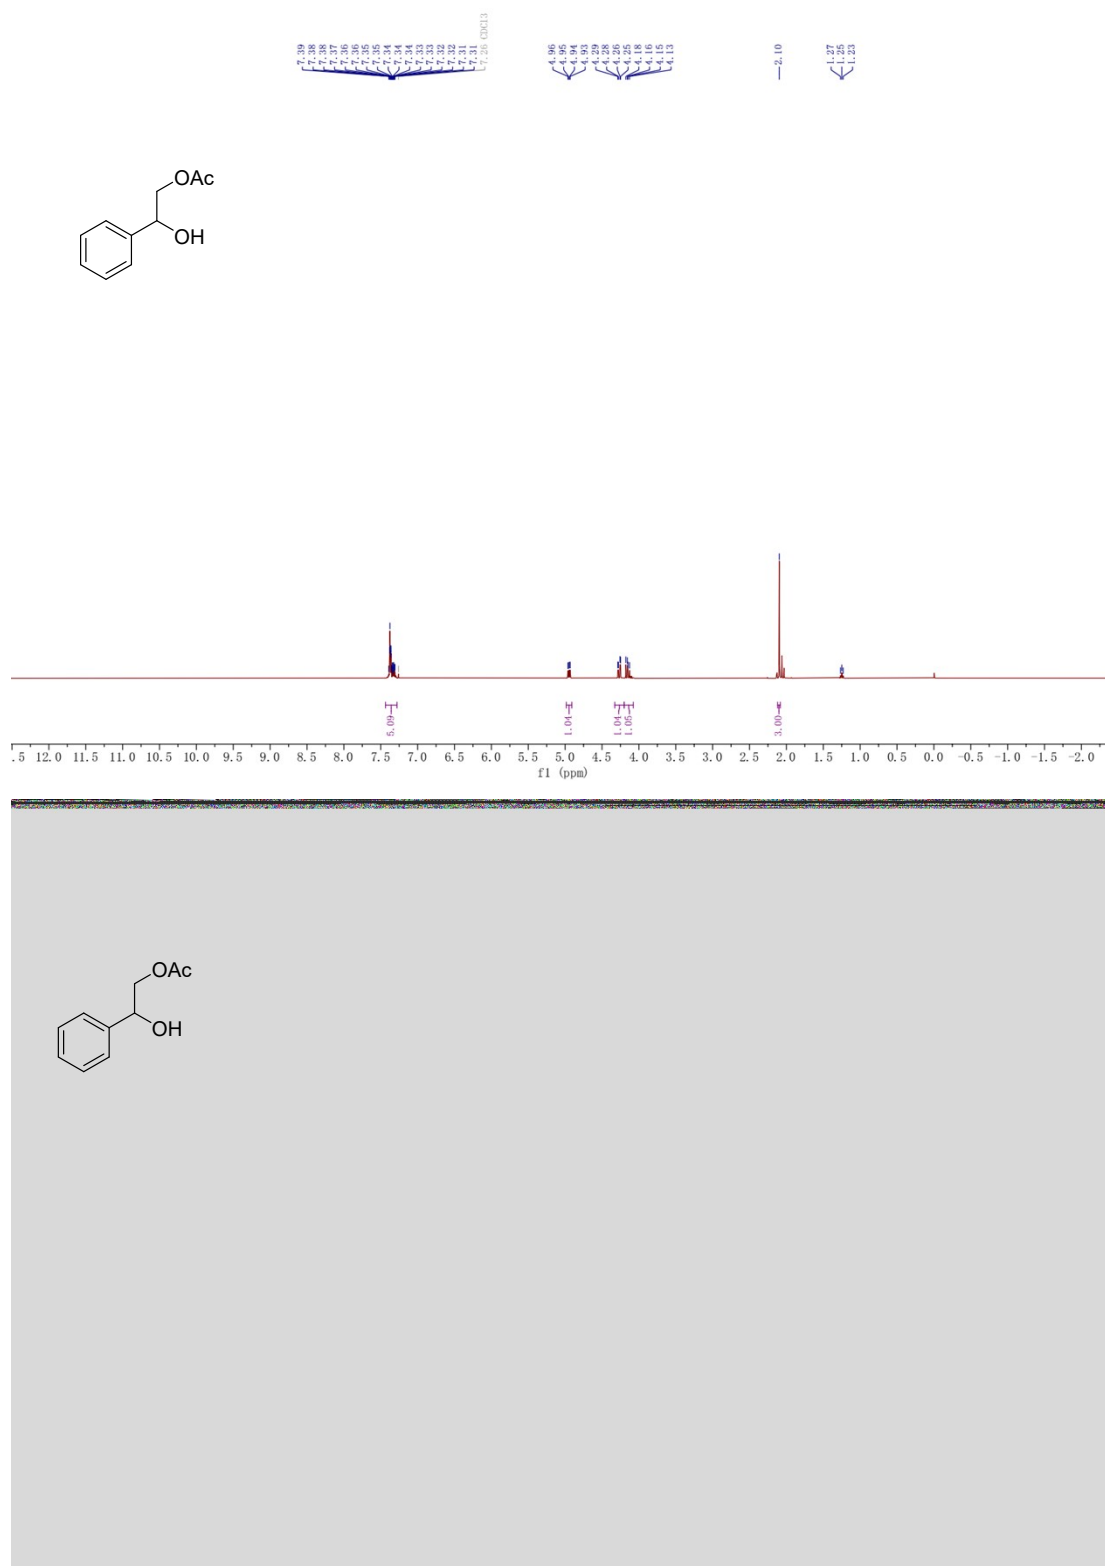

**Figure S55.** <sup>1</sup>H (top) and <sup>13</sup>C (bottom) NMR spectra of 2-hydroxy-2-phenylethyl acetate from 1-phenylethane-1,2-diol (table 5, entry 22-2).

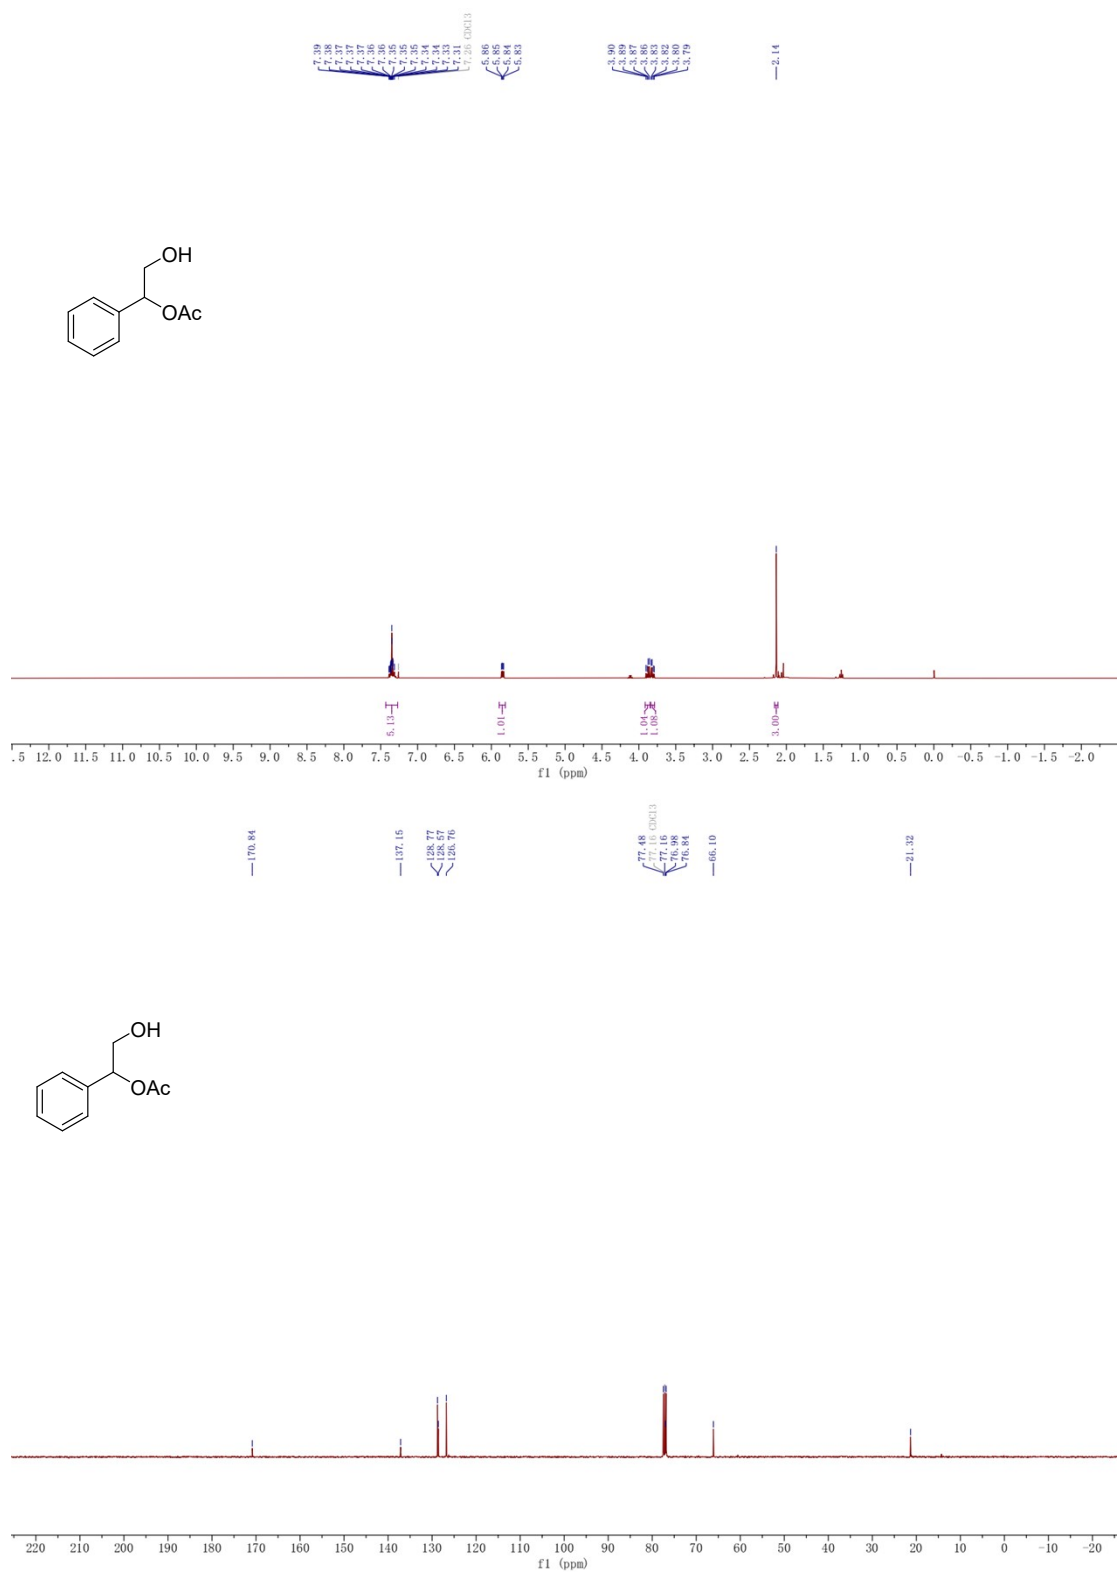

**Figure S56.** <sup>1</sup>H (top) and <sup>13</sup>C (bottom) NMR spectra of 2-hydroxy-1-phenylethyl acetate from 1-phenylethane-1,2-diol (table 5, entry 22-3).

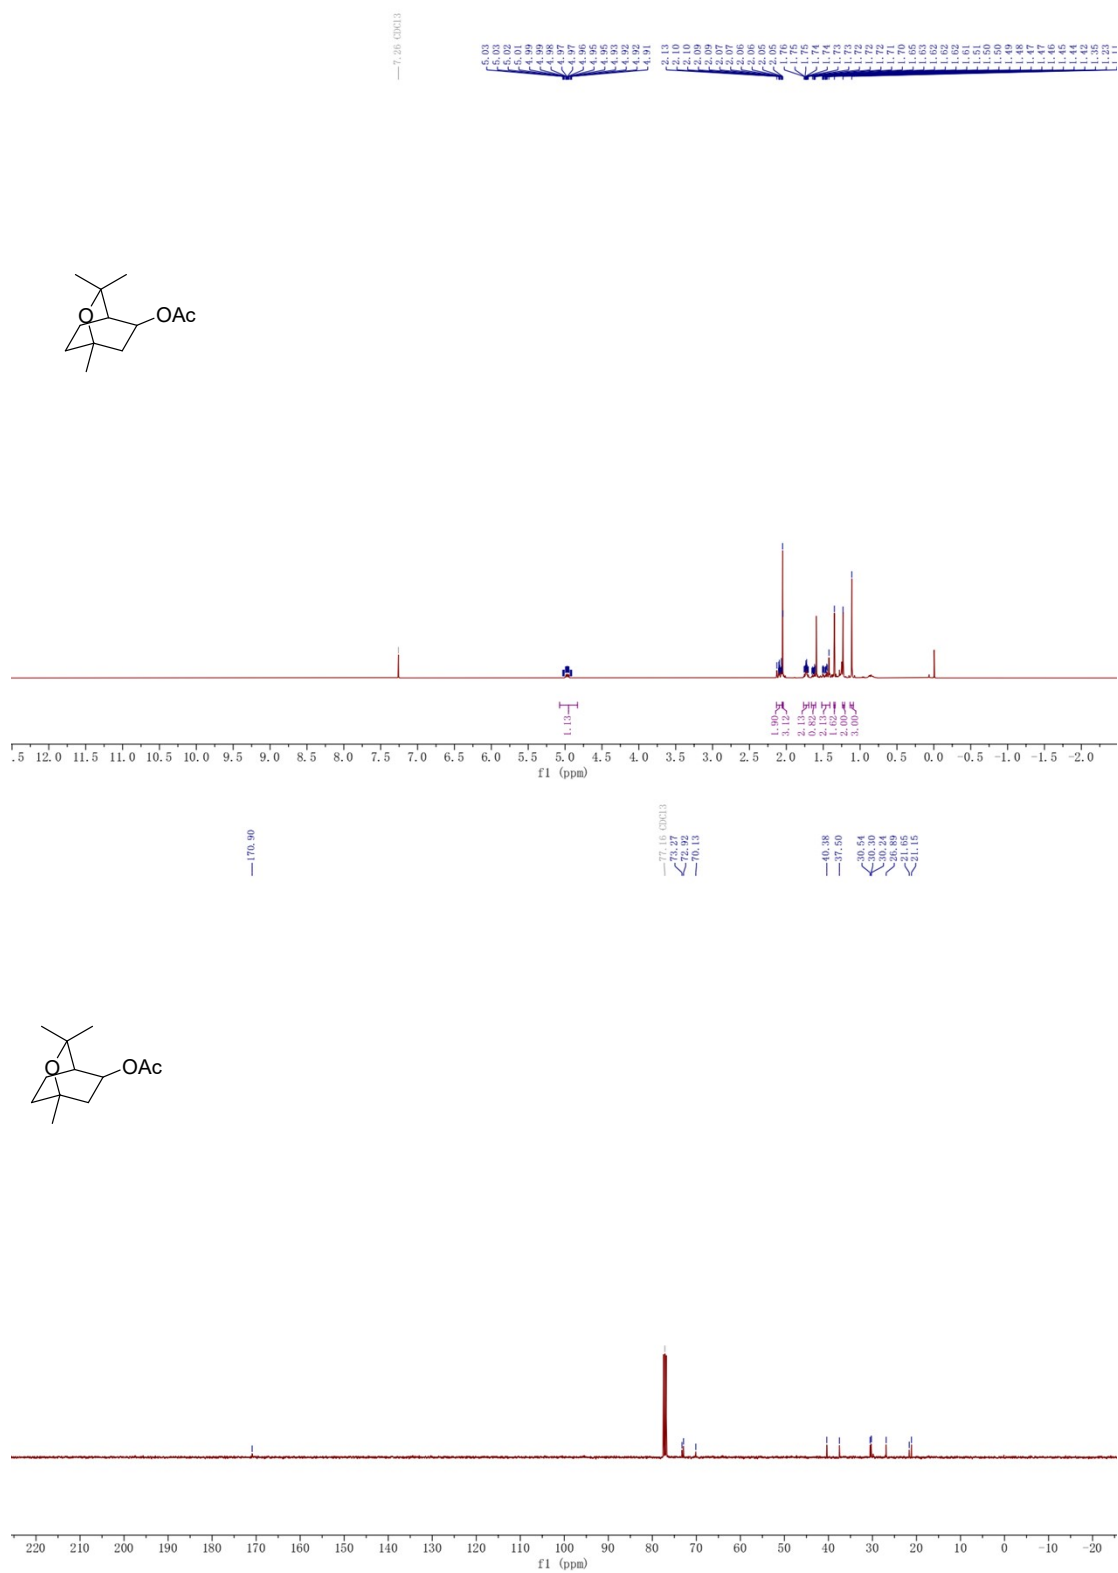

**Figure S57.** <sup>1</sup>H (top) and <sup>13</sup>C (bottom) NMR spectra of (±)-exo-1,3,3-Trimethyl-2-oxabicyclo[2.2.2]octane-5-yl acetate from (±)-exo-1,3,3-Trimethyl-2-oxabicyclo[2.2.2]octane-5-ol (table 5, entry 23).

## V. HRMS and GC-MS of the products

### 5.1. HRMS(LC-MS) of some products

Compound Table

| Compound Label | RT     | Mass     | Abund | Formula    | Tgt Mass | Diff (ppm) | MFG Formula | DB Formula |
|----------------|--------|----------|-------|------------|----------|------------|-------------|------------|
| Cpd 1: 8.4149  | 8.4149 | 180.0783 | 1193  | C10 H12 O3 | 180.0786 | -1.81      | C10 H12 O3  | C10 H12 O3 |

| Compound Label | m/z      | RT     | Algorithm       | Mass     |
|----------------|----------|--------|-----------------|----------|
| Cpd 1: 8.4149  | 179.0715 | 8.4149 | Find By Formula | 180.0783 |

MS Zoomed Spectrum

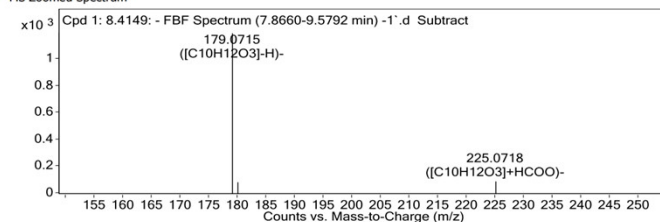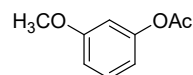

Figure S58. HRMS of 3-methoxyphenyl acetate from (3-methoxyphenyl)methanol (table 3, entry1).

Compound Table

| Compound Label | RT     | Mass     | Abund  | Formula    | Tgt Mass | Diff (ppm) | MFG Formula | DB Formula |
|----------------|--------|----------|--------|------------|----------|------------|-------------|------------|
| Cpd 1: 5.1979  | 5.1979 | 180.0793 | 392298 | C10 H12 O3 | 180.0786 | 3.72       | C10 H12 O3  | C10 H12 O3 |

| Compound Label | m/z      | RT     | Algorithm       | Mass     |
|----------------|----------|--------|-----------------|----------|
| Cpd 1: 5.1979  | 203.0685 | 5.1979 | Find By Formula | 180.0793 |

MS Zoomed Spectrum

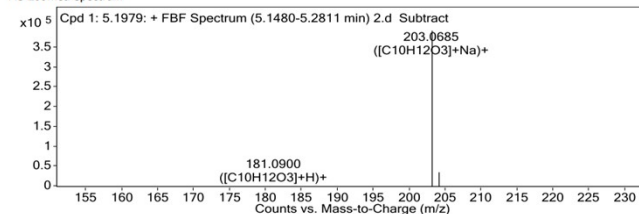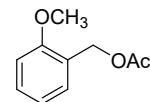

Figure S59. HRMS of 2-methoxyphenyl acetate from (2-methoxyphenyl)methanol (table 3, entry 2).

Compound Table

| Compound Label | RT     | Mass     | Abund | Formula    | Tgt Mass | Diff (ppm) | MFG Formula | DB Formula |
|----------------|--------|----------|-------|------------|----------|------------|-------------|------------|
| Cpd 1: 4.9319  | 4.9319 | 180.0786 | 6818  | C10 H12 O3 | 180.0786 | -0.49      | C10 H12 O3  | C10 H12 O3 |

| Compound Label | m/z      | RT     | Algorithm       | Mass     |
|----------------|----------|--------|-----------------|----------|
| Cpd 1: 4.9319  | 203.0677 | 4.9319 | Find By Formula | 180.0786 |

MS Zoomed Spectrum

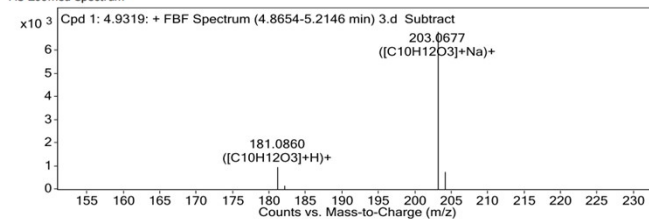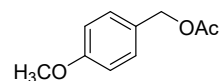



Figure S60. HRMS of 4-methoxyphenyl acetate from (4-methoxyphenyl)methanol(table 3, entry 3).

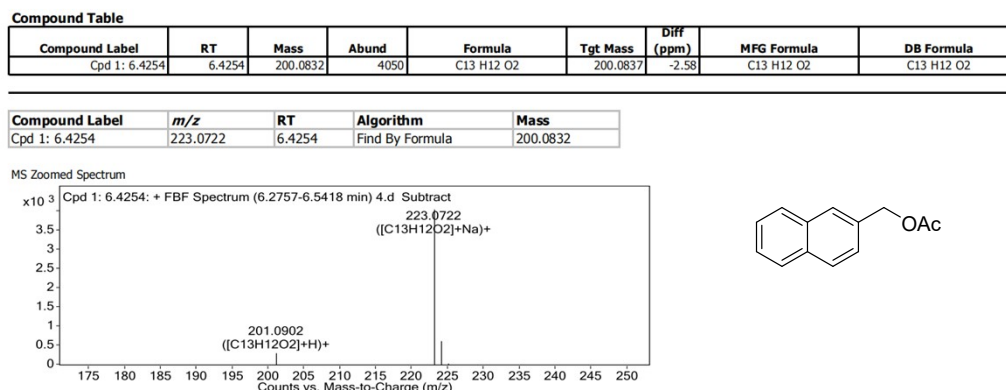

Figure S61. HRMS of naphthalen-2-ylmethyl acetate from naphthalen-2-ylmethanol(table 3, entry 4).

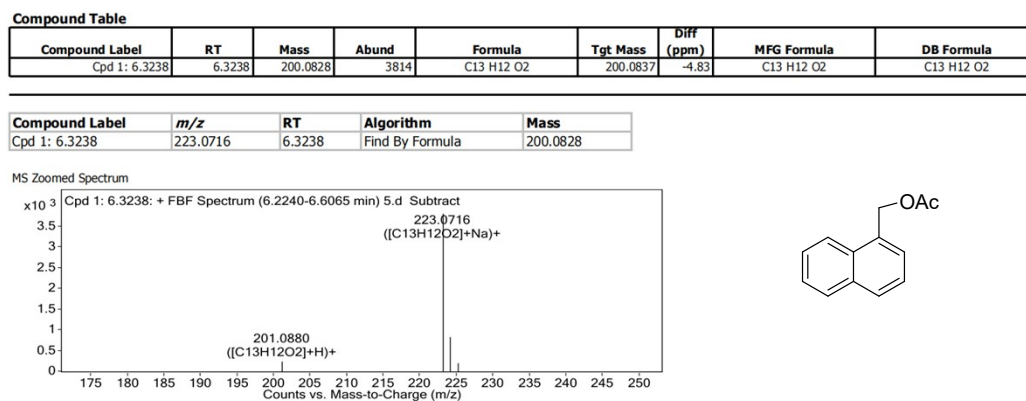

Figure S62. HRMS of naphthalen-1-ylmethyl acetate from naphthalen-1-ylmethanol(table 3, entry 5).

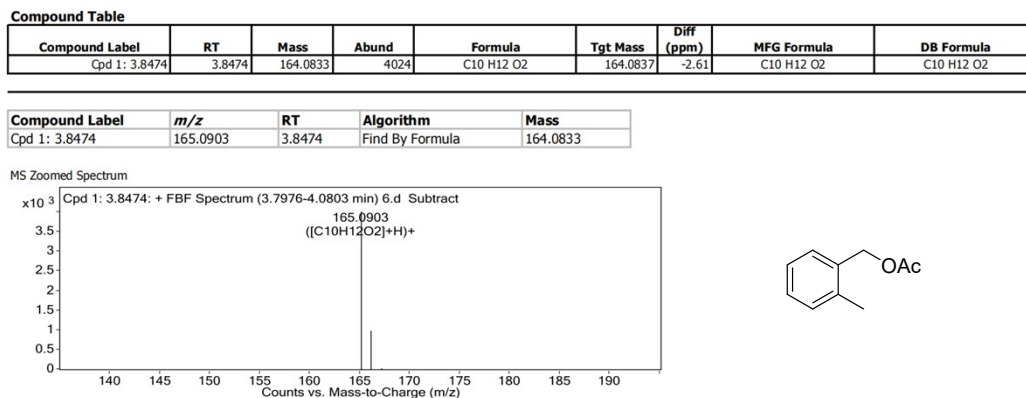

Figure S63. HRMS of 2-methylbenzyl acetate from 2-methylbenzyl alcohol(table 3, entry 6).

Compound Table

| Compound Label | RT     | Mass     | Abund | Formula    | Tgt Mass | Diff (ppm) | MFG Formula | DB Formula |
|----------------|--------|----------|-------|------------|----------|------------|-------------|------------|
| Cpd 1: 3.8624  | 3.8624 | 164.0835 | 8288  | C10 H12 O2 | 164.0837 | -1.11      | C10 H12 O2  | C10 H12 O2 |

| Compound Label | m/z      | RT     | Algorithm       | Mass     |
|----------------|----------|--------|-----------------|----------|
| Cpd 1: 3.8624  | 165.0907 | 3.8624 | Find By Formula | 164.0835 |

MS Zoomed Spectrum

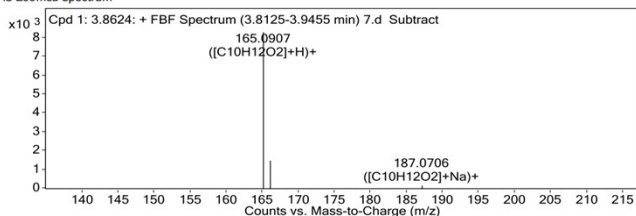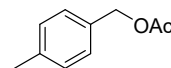

Figure S64. HRMS of 4-methylbenzyl acetate from 4-methylbenzyl alcohol(table 3, entry 7).

Compound Table

| Compound Label | RT     | Mass     | Abund | Formula    | Tgt Mass | Diff (ppm) | MFG Formula | DB Formula |
|----------------|--------|----------|-------|------------|----------|------------|-------------|------------|
| Cpd 1: 3.0669  | 3.0669 | 168.0572 | 4239  | C9 H9 F O2 | 168.0587 | -8.92      | C9 H9 F O2  | C9 H9 F O2 |

| Compound Label | m/z      | RT     | Algorithm       | Mass     |
|----------------|----------|--------|-----------------|----------|
| Cpd 1: 3.0669  | 213.0553 | 3.0669 | Find By Formula | 168.0572 |

MS Zoomed Spectrum

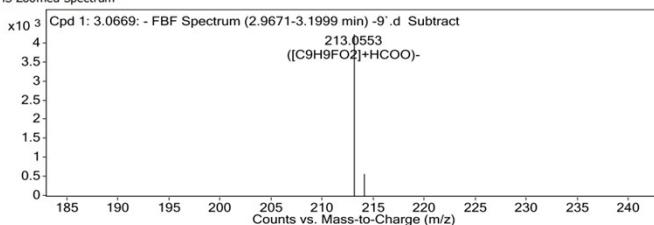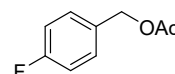

Figure S65. HRMS of 4-fluorobenzyl acetate from (4-fluorophenyl)methanol(table 3, entry 9).

Compound Table

| Compound Label | RT     | Mass     | Abund | Formula      | Tgt Mass | Diff (ppm) | MFG Formula  | DB Formula   |
|----------------|--------|----------|-------|--------------|----------|------------|--------------|--------------|
| Cpd 1: 6.3441  | 6.3441 | 218.0534 | 2765  | C10 H9 F3 O2 | 218.0555 | -9.55      | C10 H9 F3 O2 | C10 H9 F3 O2 |

| Compound Label | m/z      | RT     | Algorithm       | Mass     |
|----------------|----------|--------|-----------------|----------|
| Cpd 1: 6.3441  | 217.0458 | 6.3441 | Find By Formula | 218.0534 |

MS Zoomed Spectrum

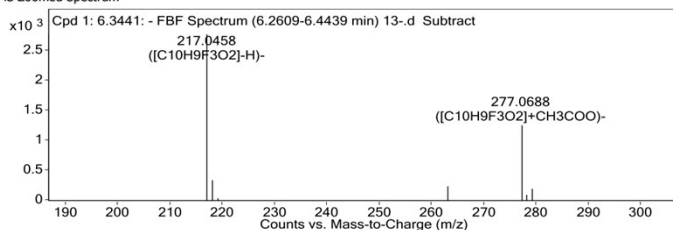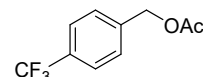

Figure S66. HRMS of 4-(trifluoromethyl)benzyl acetate from (4-(trifluoromethyl)phenyl)methanol(table 3, entry 13).

Compound Table

| Compound Label | RT     | Mass     | Abund | Formula    | Tgt Mass | Diff (ppm) | MFG Formula | DB Formula |
|----------------|--------|----------|-------|------------|----------|------------|-------------|------------|
| Cpd 1: 2.9546  | 2.9546 | 195.0542 | 1176  | C9 H9 N O4 | 195.0532 | 5.55       | C9 H9 N O4  | C9 H9 N O4 |

| Compound Label | m/z      | RT     | Algorithm       | Mass     |
|----------------|----------|--------|-----------------|----------|
| Cpd 1: 2.9546  | 218.0433 | 2.9546 | Find By Formula | 195.0542 |

MS Zoomed Spectrum

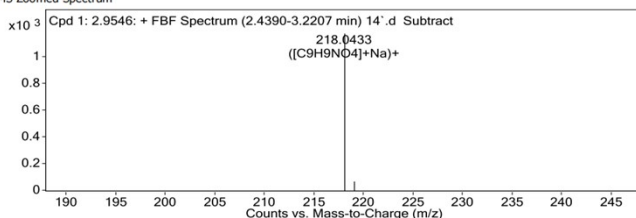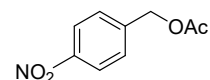

Figure S67. HRMS of 4-nitrobenzyl acetate from (4-nitrophenyl)methanol(table 3, entry 14).

Compound Table

| Compound Label | RT     | Mass     | Abund | Formula     | Tgt Mass | Diff (ppm) | MFG Formula | DB Formula  |
|----------------|--------|----------|-------|-------------|----------|------------|-------------|-------------|
| Cpd 1: 4.4297  | 4.4297 | 175.0628 | 11831 | C10 H9 N O2 | 175.0633 | -2.86      | C10 H9 N O2 | C10 H9 N O2 |

| Compound Label | m/z      | RT     | Algorithm       | Mass     |
|----------------|----------|--------|-----------------|----------|
| Cpd 1: 4.4297  | 176.0704 | 4.4297 | Find By Formula | 175.0628 |

MS Zoomed Spectrum

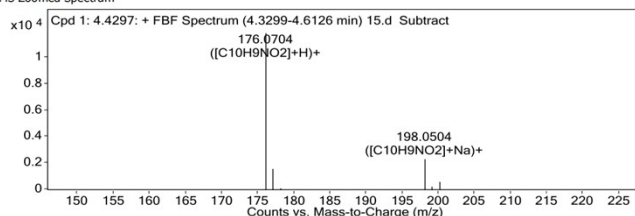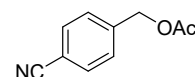

Figure S68. HRMS of 4-cyanobenzyl acetate from 4-(hydroxymethyl)benzonitrile(table 3, entry 15).

Compound Table

| Compound Label | RT     | Mass     | Abund | Formula    | Tgt Mass | Diff (ppm) | MFG Formula | DB Formula |
|----------------|--------|----------|-------|------------|----------|------------|-------------|------------|
| Cpd 1: 5.5775  | 5.5775 | 174.0681 | 14928 | C11 H10 O2 | 174.0681 | -0.11      | C11 H10 O2  | C11 H10 O2 |

| Compound Label | m/z      | RT     | Algorithm       | Mass     |
|----------------|----------|--------|-----------------|----------|
| Cpd 1: 5.5775  | 175.0751 | 5.5775 | Find By Formula | 174.0681 |

MS Zoomed Spectrum

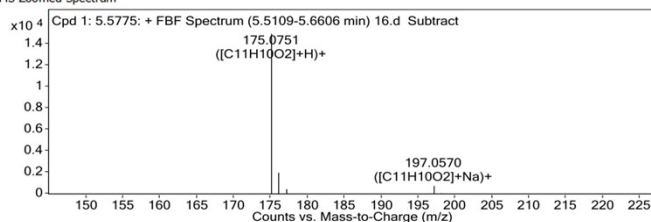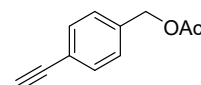

Figure S69. HRMS of 4-ethynylbenzyl acetate from (4-ethynylphenyl)methanol(table 3, entry 16).

Compound Table

| Compound Label | RT     | Mass     | Abund | Formula    | Tgt Mass | Diff (ppm) | MFG Formula | DB Formula |
|----------------|--------|----------|-------|------------|----------|------------|-------------|------------|
| Cpd 1: 3.8446  | 3.8446 | 164.0835 | 14617 | C10 H12 O2 | 164.0837 | -1.24      | C10 H12 O2  | C10 H12 O2 |

| Compound Label | m/z      | RT     | Algorithm       | Mass     |
|----------------|----------|--------|-----------------|----------|
| Cpd 1: 3.8446  | 165.0908 | 3.8446 | Find By Formula | 164.0835 |

MS Zoomed Spectrum

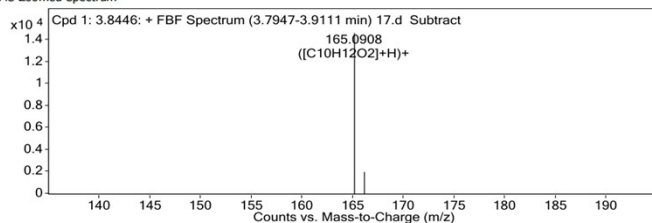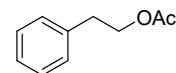

Figure S70. HRMS of phenethyl acetate from 2-phenylethan-1-ol(table 3, entry 17).

Compound Table

| Compound Label | RT     | Mass     | Abund | Formula    | Tgt Mass | Diff (ppm) | MFG Formula | DB Formula |
|----------------|--------|----------|-------|------------|----------|------------|-------------|------------|
| Cpd 1: 5.3564  | 5.3564 | 194.0941 | 15852 | C11 H14 O3 | 194.0943 | -1.17      | C11 H14 O3  | C11 H14 O3 |

| Compound Label | m/z      | RT     | Algorithm       | Mass     |
|----------------|----------|--------|-----------------|----------|
| Cpd 1: 5.3564  | 217.0834 | 5.3564 | Find By Formula | 194.0941 |

MS Zoomed Spectrum

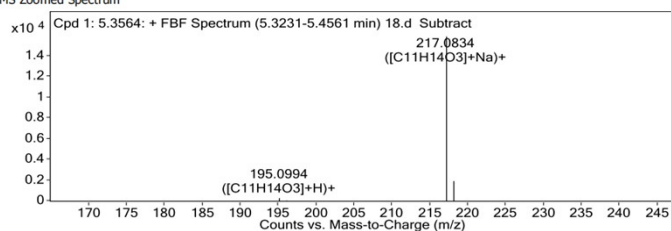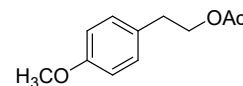

Figure S71. HRMS of 4-methoxyphenethyl acetate from 2-(4-methoxyphenyl)ethan-1-ol(table 3, entry 18).

Compound Table

| Compound Label | RT     | Mass     | Abund | Formula    | Tgt Mass | Diff (ppm) | MFG Formula | DB Formula |
|----------------|--------|----------|-------|------------|----------|------------|-------------|------------|
| Cpd 1: 6.2145  | 6.2145 | 178.0992 | 97830 | C11 H14 O2 | 178.0994 | -0.93      | C11 H14 O2  | C11 H14 O2 |

| Compound Label | m/z      | RT     | Algorithm       | Mass     |
|----------------|----------|--------|-----------------|----------|
| Cpd 1: 6.2145  | 179.1065 | 6.2145 | Find By Formula | 178.0992 |

MS Zoomed Spectrum

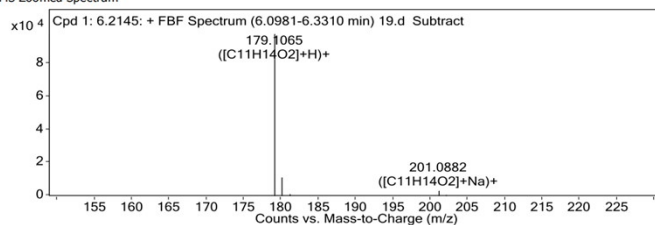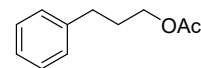

Figure S72. HRMS of 3-phenylpropyl acetate from 3-phenylpropan-1-ol(table 3, entry 19).

Compound Table

| Compound Label | RT     | Mass     | Abund | Formula    | Tgt Mass | Diff (ppm) | MFG Formula | DB Formula |
|----------------|--------|----------|-------|------------|----------|------------|-------------|------------|
| Cpd 1: 5.4155  | 5.4155 | 192.1142 | 658   | C12 H16 O2 | 192.115  | -4.16      | C12 H16 O2  | C12 H16 O2 |

| Compound Label | m/z      | RT     | Algorithm       | Mass     |
|----------------|----------|--------|-----------------|----------|
| Cpd 1: 5.4155  | 237.1124 | 5.4155 | Find By Formula | 192.1142 |

MS Zoomed Spectrum

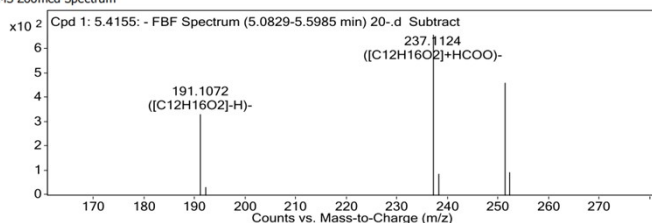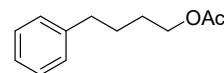

Figure S73. HRMS of 4-phenylbutyl acetate from 4-phenylbutan-1-ol(table 3, entry 20).

Compound Table

| Compound Label | RT    | Mass     | Abund | Formula   | Tgt Mass | Diff (ppm) | MFG Formula | DB Formula |
|----------------|-------|----------|-------|-----------|----------|------------|-------------|------------|
| Cpd 1: 5.7950  | 5.795 | 156.1141 | 1085  | C9 H16 O2 | 156.115  | -6.23      | C9 H16 O2   | C9 H16 O2  |

| Compound Label | m/z      | RT    | Algorithm       | Mass     |
|----------------|----------|-------|-----------------|----------|
| Cpd 1: 5.7950  | 215.1281 | 5.795 | Find By Formula | 156.1141 |

MS Zoomed Spectrum

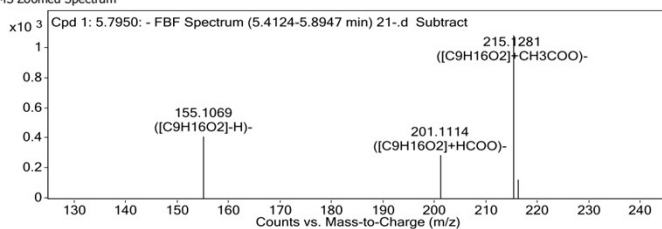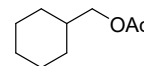

Figure S74. HRMS of cyclohexylmethyl acetate from cyclohexylmethanol(table 3, entry 21).

Compound Table

| Compound Label | RT     | Mass     | Abund | Formula    | Tgt Mass | Diff (ppm) | MFG Formula | DB Formula |
|----------------|--------|----------|-------|------------|----------|------------|-------------|------------|
| Cpd 1: 5.5471  | 5.5471 | 176.0834 | 8596  | C11 H12 O2 | 176.0837 | -1.66      | C11 H12 O2  | C11 H12 O2 |

| Compound Label | m/z      | RT     | Algorithm       | Mass     |
|----------------|----------|--------|-----------------|----------|
| Cpd 1: 5.5471  | 177.0908 | 5.5471 | Find By Formula | 176.0834 |

MS Zoomed Spectrum

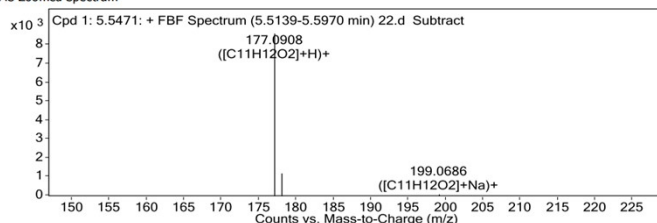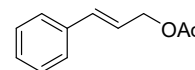

Figure S75. HRMS of Cinnamyl acetate from Cinnamyl alcohol(table 3, entry 22).

Compound Table

| Compound Label | RT     | Mass     | Abund | Formula  | Tgt Mass | Diff (ppm) | MFG Formula | DB Formula |
|----------------|--------|----------|-------|----------|----------|------------|-------------|------------|
| Cpd 1: 2.0666  | 2.0666 | 140.0471 | 25351 | C7 H8 O3 | 140.0473 | -2.01      | C7 H8 O3    | C7 H8 O3   |

| Compound Label | m/z      | RT     | Algorithm       | Mass     |
|----------------|----------|--------|-----------------|----------|
| Cpd 1: 2.0666  | 199.0609 | 2.0666 | Find By Formula | 140.0471 |

MS Zoomed Spectrum

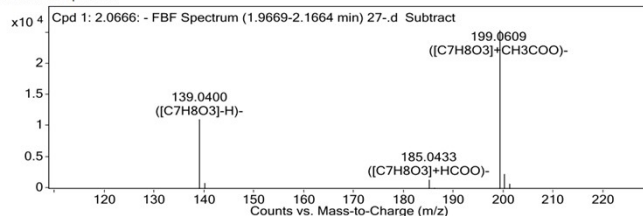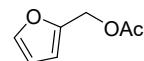

Figure S76. HRMS of furan-2-ylmethyl acetate from furan-2-ylmethanol(table 3, entry 27).

Compound Table

| Compound Label | RT     | Mass     | Abund | Formula    | Tgt Mass | Diff (ppm) | MFG Formula | DB Formula |
|----------------|--------|----------|-------|------------|----------|------------|-------------|------------|
| Cpd 1: 4.8236  | 4.8236 | 222.0891 | 78725 | C12 H14 O4 | 222.0892 | -0.67      | C12 H14 O4  | C12 H14 O4 |

| Compound Label | m/z      | RT     | Algorithm       | Mass     |
|----------------|----------|--------|-----------------|----------|
| Cpd 1: 4.8236  | 245.0783 | 4.8236 | Find By Formula | 222.0891 |

MS Zoomed Spectrum

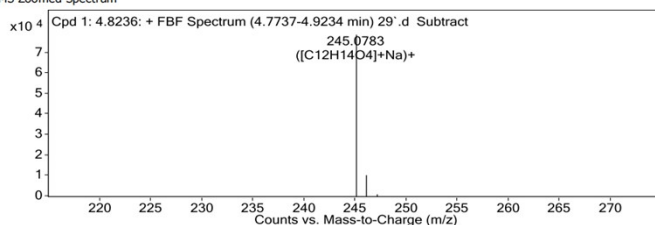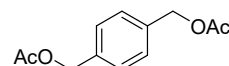

Figure S77. HRMS of 1,4-phenylenebis(methylene) diacetate from 1,4-phenylenedimethanol(table 3, entry 29).

## 5.2. GC-MS of some products

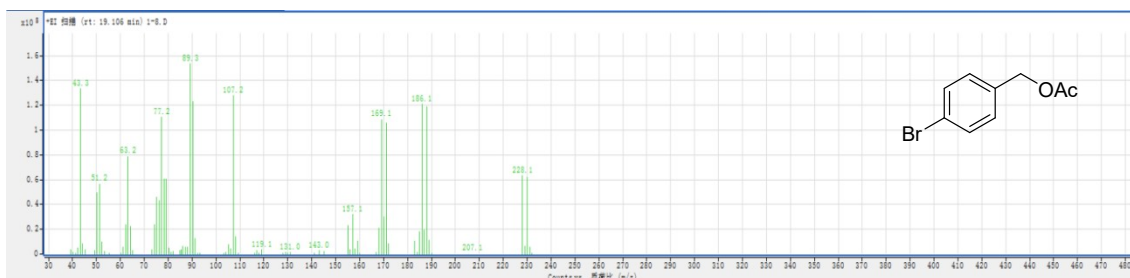

Figure S78. GC-MS of 4-bromobenzyl acetate from (4-bromophenyl)methanol (table 3, entry 8).

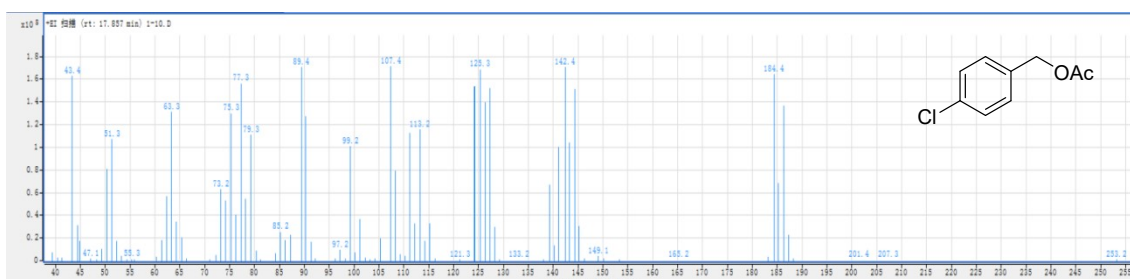

Figure S79. GC-MS of 4-chlorobenzyl acetate from (4-chlorophenyl)methanol (table 3, entry 10).

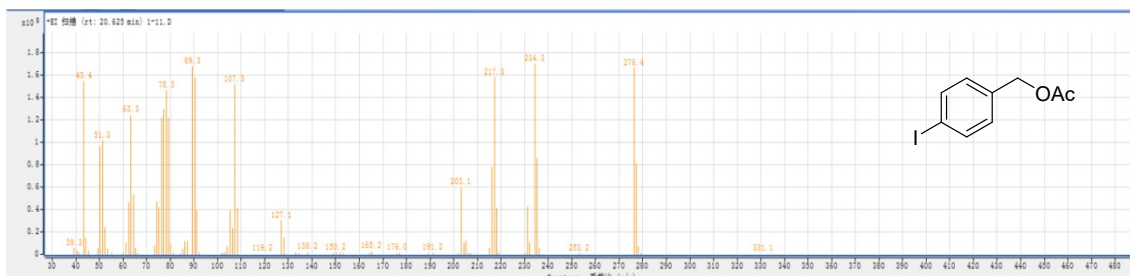

Figure S80. GC-MS of 4-iodobenzyl acetate from (4-iodophenyl)methanol (table 3, entry 11).

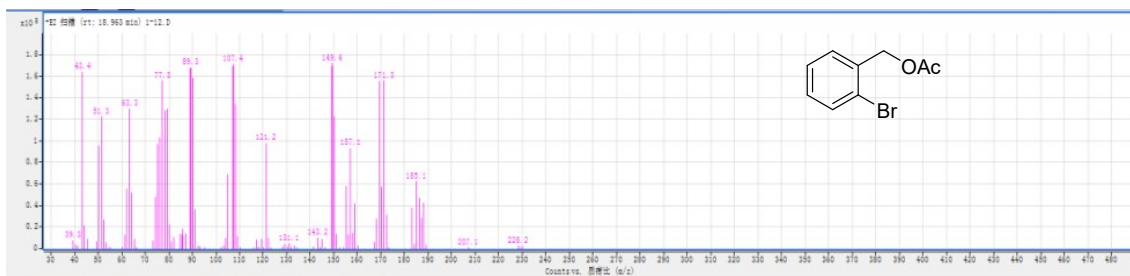

Figure S81. GC-MS of 2-bromobenzyl acetate from (2-bromophenyl)methanol (table 3, entry 12).

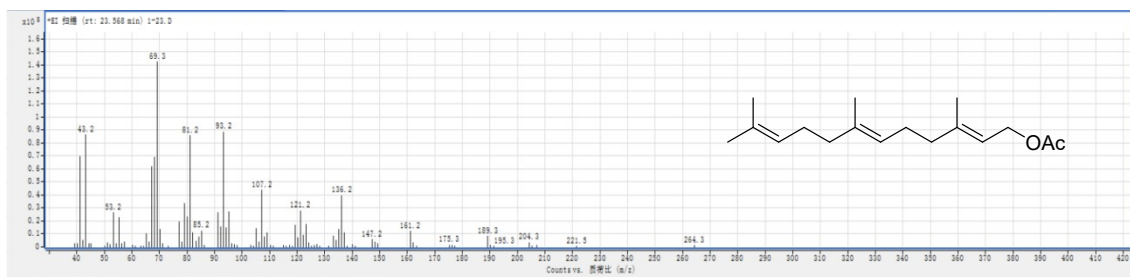

**Figure S82. GC-MS of Farnesyl acetate from Farnesol(table 3, entry 23).**

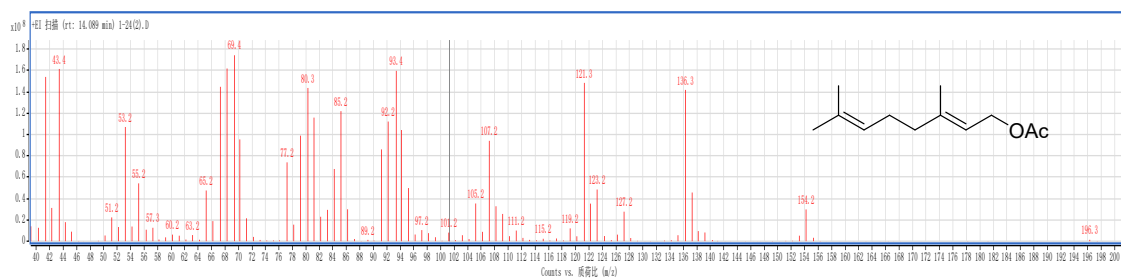

**Figure S83. GC-MS of Geranyl acetate from Geraniol(table 3, entry 24).**

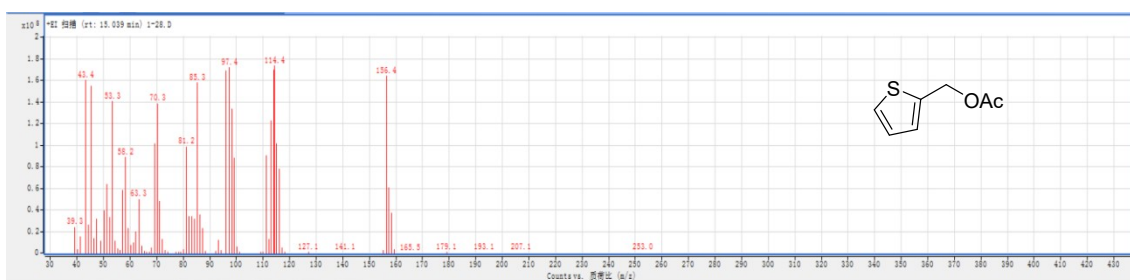

**Figure S84. GC-MS of thiophen-2-ylmethyl acetate from thiophen-2-ylmethanol(table 3, entry 28).**

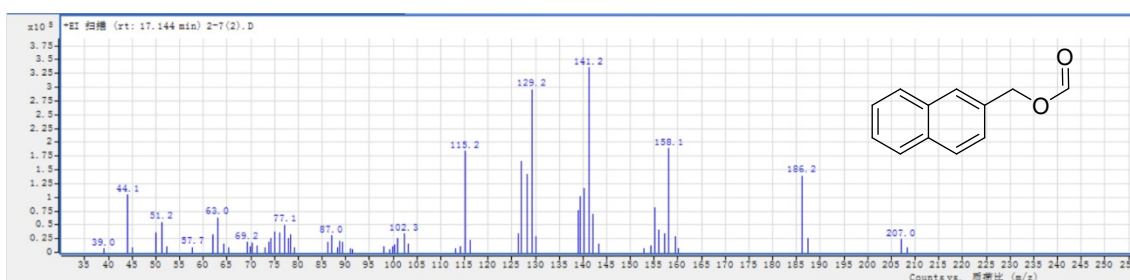

**Figure S85. GC-MS of naphthalen-2-ylmethyl formate from naphthalen-2-ylmethanol(table 4, entry 7).**



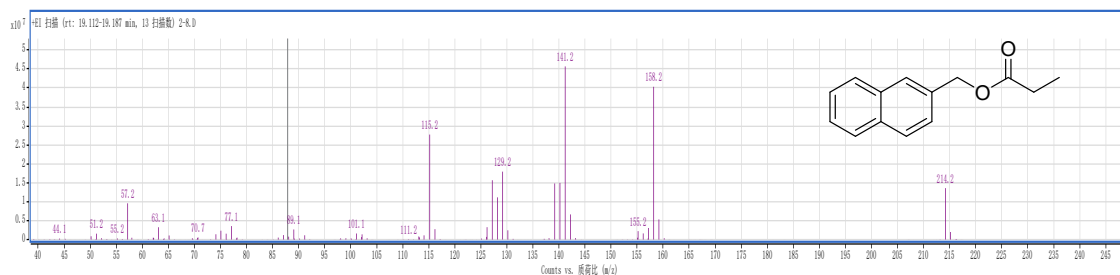

**Figure S86. GC-MS of naphthalen-2-ylmethyl propionate from naphthalen-2-ylmethanol(table 4, entry 8).**

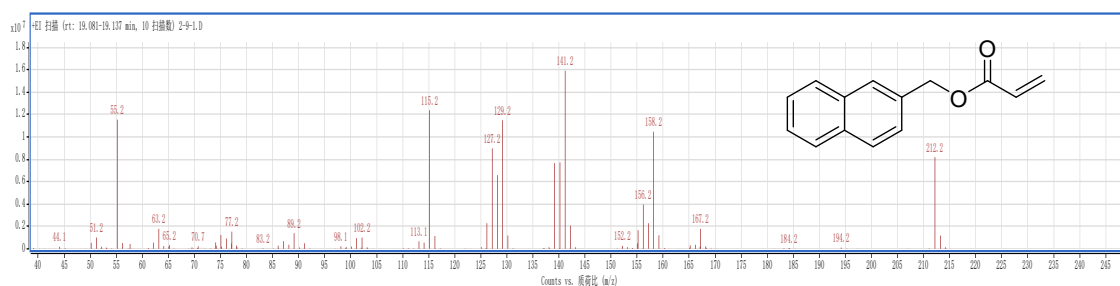

**Figure S87. GC-MS of naphthalen-2-ylmethyl acrylate from naphthalen-2-ylmethanol(table 4, entry 9-1).**

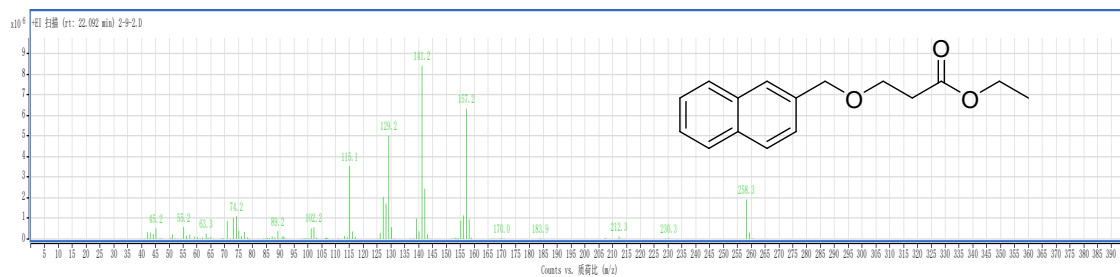

**Figure S88. GC-MS of ethyl 3-(naphthalen-2-ylmethoxy)propanoate from naphthalen-2-ylmethanol(table 4, entry 9-2).**

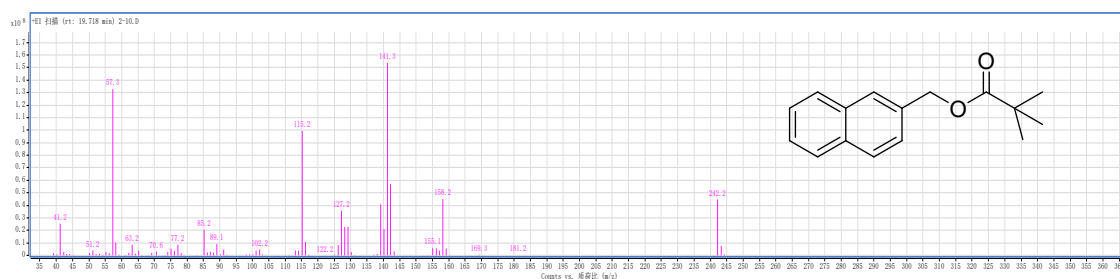

**Figure S89. GC-MS of naphthalen-2-ylmethyl pivalate from naphthalen-2-ylmethanol(table 4, entry 11)**

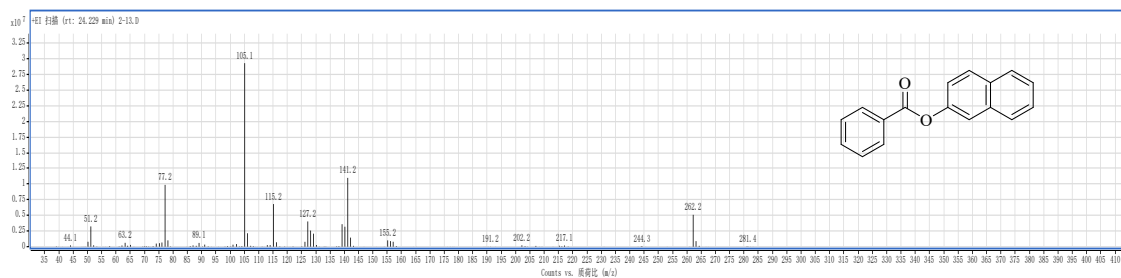

**Figure S90. GC-MS of naphthalen-2-ylmethyl benzoate from naphthalen-2-ylmethanol (table 4, entry 13)**

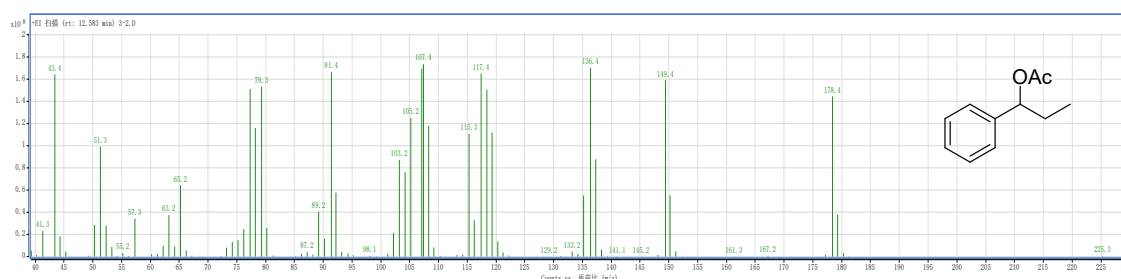

**Figure S91. GC-MS of 1-phenylpropyl acetate from 1-phenylpropan-1-ol (table 5, entry 2).**

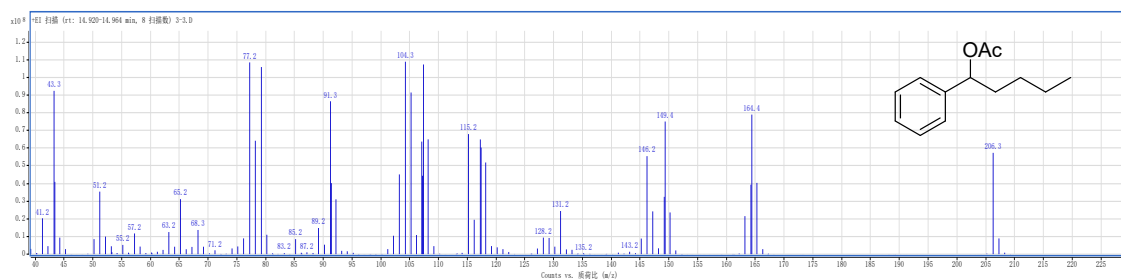

**Figure S92. GC-MS of 1-phenylpentyl acetate from 1-phenylpentan-1-ol (table 5, entry 3).**

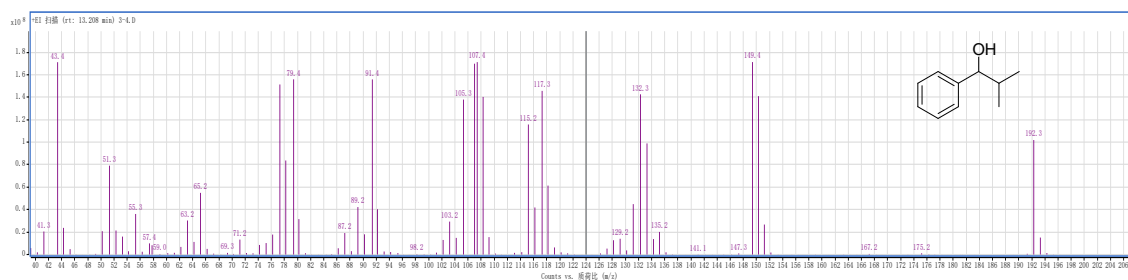

**Figure S93. GC-MS of 1-phenylpentyl acetate from 1-phenylpentan-1-ol (table 5, entry 4).**

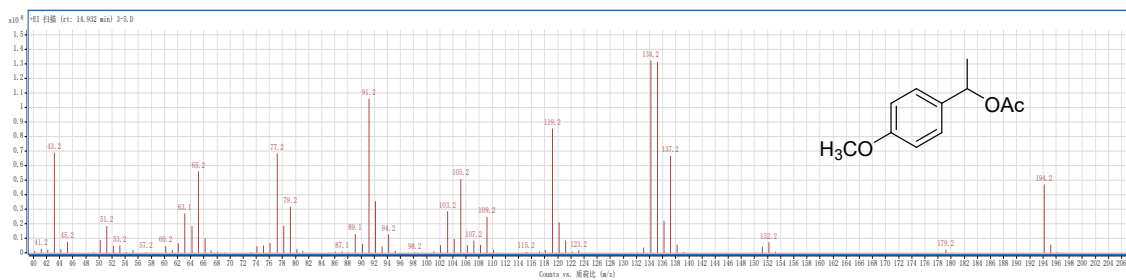

**Figure S94. GC-MS of 1-(4-methoxyphenyl)ethyl acetate from 1-(4-methoxyphenyl)ethan-1-ol(table 5, entry 5).**

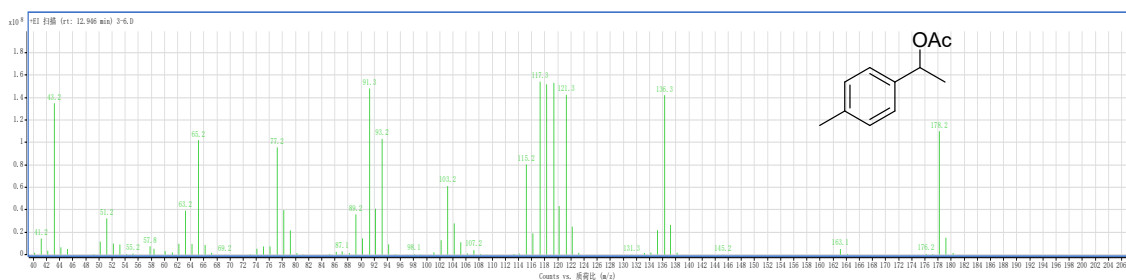

**Figure S95. GC-MS of 1-(p-tolyl)ethyl acetate from 1-(p-tolyl)ethan-1-ol(table 5, entry 6).**

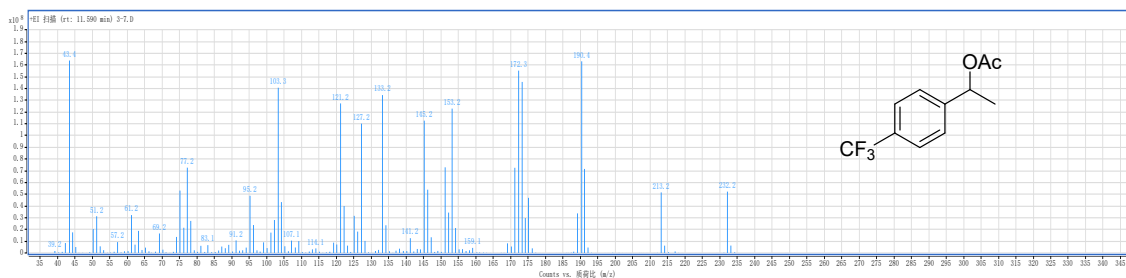

**Figure S96. GC-MS of 1-(4-(trifluoromethyl)phenyl)ethyl acetate from 1-(4-(trifluoromethyl)phenyl)ethan-1-ol(table 5, entry 7).**

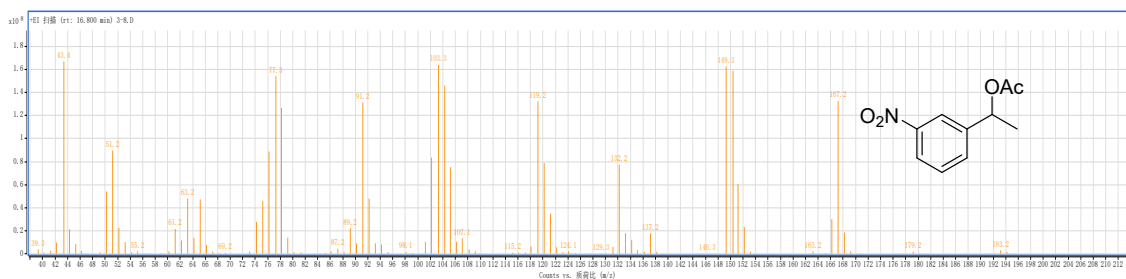

**Figure S97. GC-MS of 1-(3-nitrophenyl)ethyl acetate from 1-(3-nitrophenyl)ethan-1-ol(table 5, entry 8).**

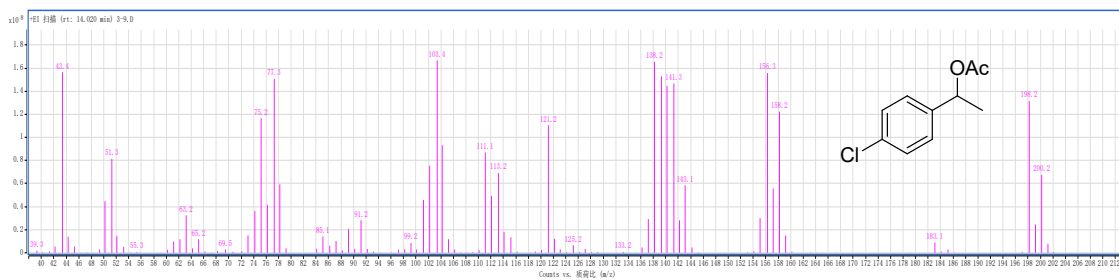

**Figure S98.** GC-MS of 1-(4-chlorophenyl)ethyl acetate from 1-(4-chlorophenyl)ethan-1-ol(table 5, entry 9).

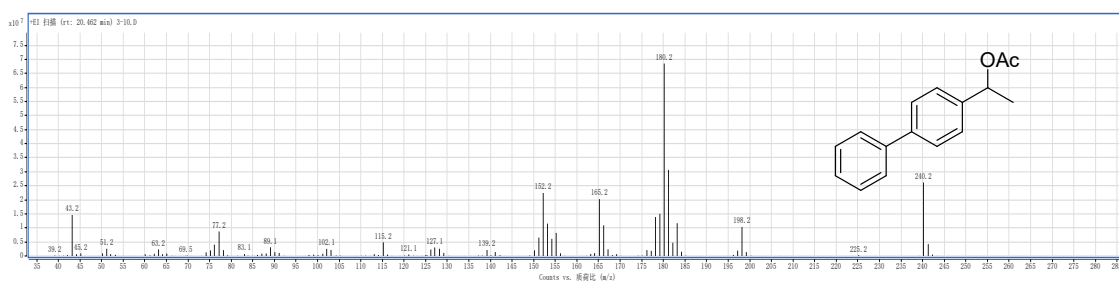

**Figure S99.** GC-MS of 1-([1,1'-biphenyl]-4-yl)ethyl acetate from 1-([1,1'-biphenyl]-4-yl)ethan-1-ol(table 5, entry 10).

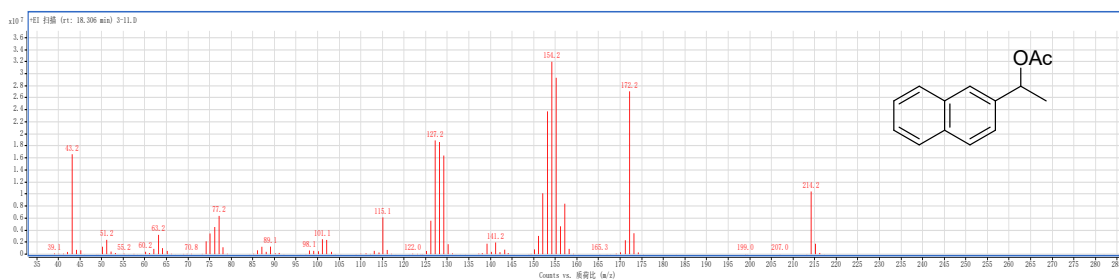

**Figure S100.** GC-MS of 1-(naphthalen-2-yl)ethyl acetate from 1-(naphthalen-2-yl)ethan-1-ol(table 5, entry 11).

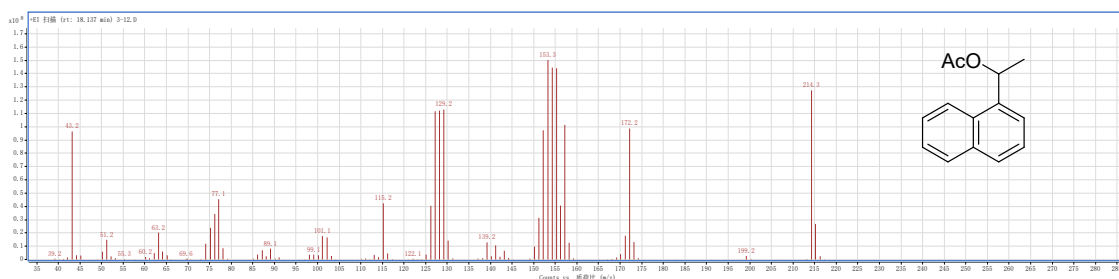

**Figure S101.** GC-MS of 1-(naphthalen-1-yl)ethyl acetate from 1-(naphthalen-1-yl)ethan-1-ol(table 5, entry 12).

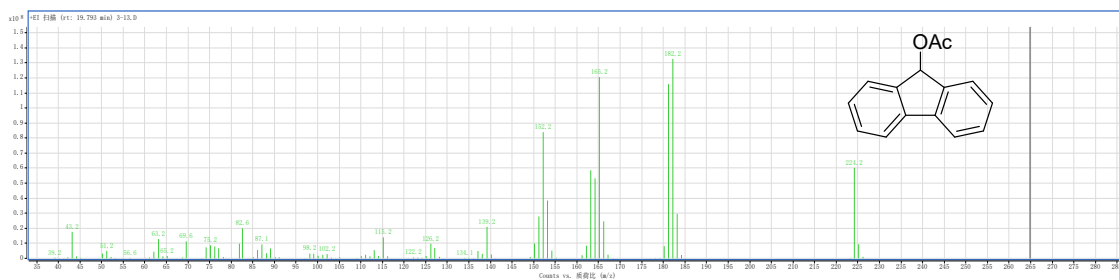

**Figure S102.** GC-MS of 9H-fluoren-9-yl acetate from 9H-fluoren-9-ol(table 5, entry 13).

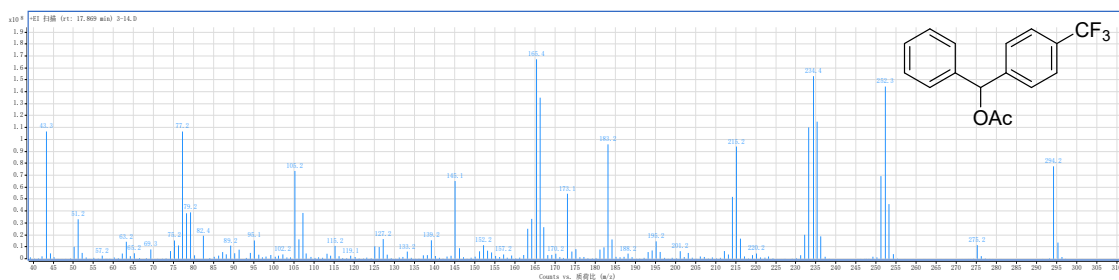

**Figure S103.** GC-MS of phenyl(4-(trifluoromethyl)phenyl)methyl acetate from phenyl(4-(trifluoromethyl)phenyl)methanol(table 5, entry 14).

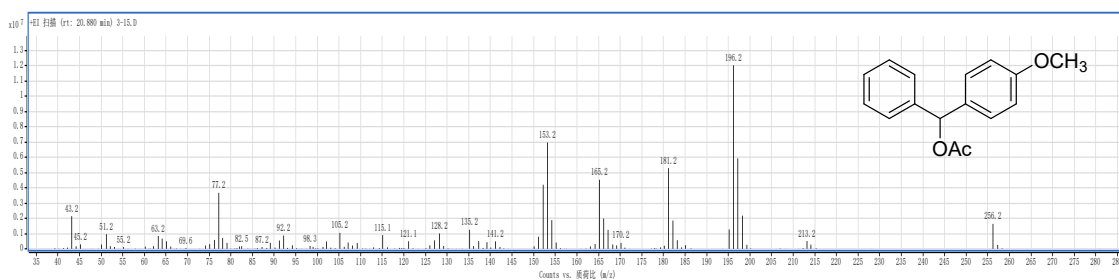

**Figure S104.** GC-MS of (4-methoxyphenyl)(phenyl)methyl acetate from (4-methoxyphenyl)(phenyl)methanol(table 5, entry 15).

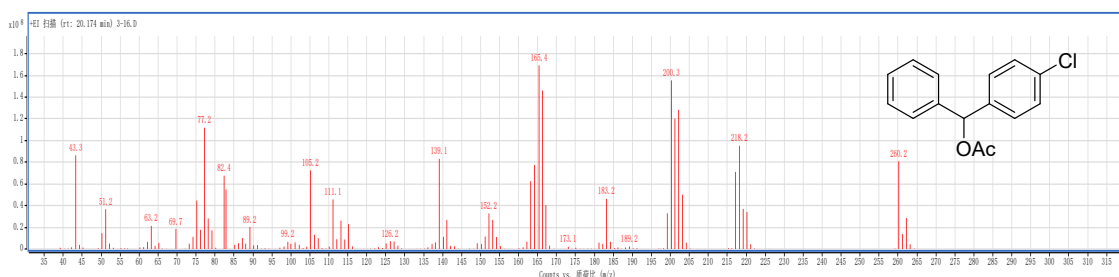

**Figure S105.** GC-MS of (4-chlorophenyl)(phenyl)methyl acetate from (4-chlorophenyl)(phenyl)methanol(table 5, entry 16)

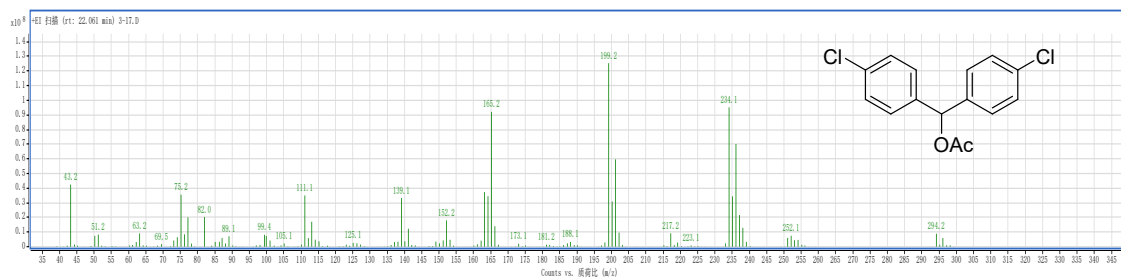

**Figure S106. GC-MS of bis(4-chlorophenyl)methyl acetate from bis(4-chlorophenyl)methanol(table 5, entry 17).**

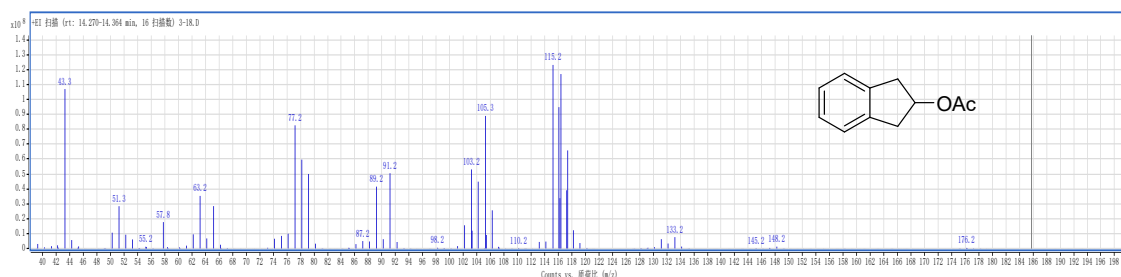

**Figure S107. GC-MS of 2,3-dihydro-1H-inden-2-yl acetate from 2,3-dihydro-1H-inden-2-ol(table 5, entry 18).**

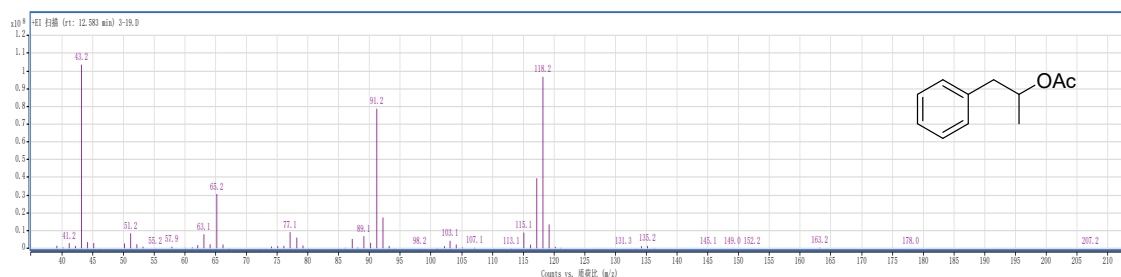

**Figure S108. GC-MS of 1-phenylpropan-2-yl acetate from 1-phenylpropan-2-ol(table 5, entry 19).**

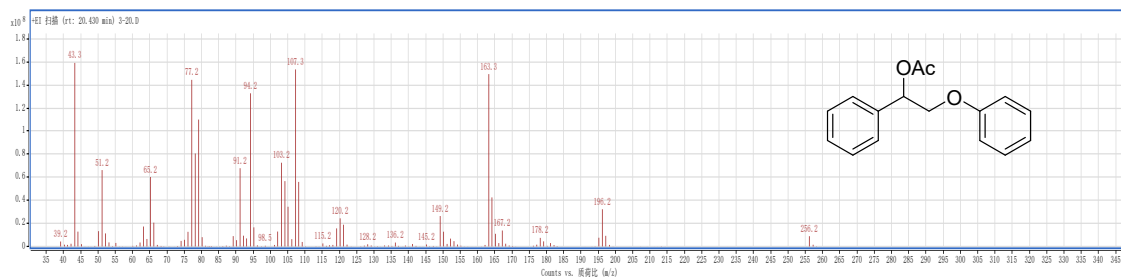

**Figure S109. GC-MS of 2-phenoxy-1-phenylethyl acetate from 2-phenoxy-1-phenylethan-1-ol(table 5, entry 20).**

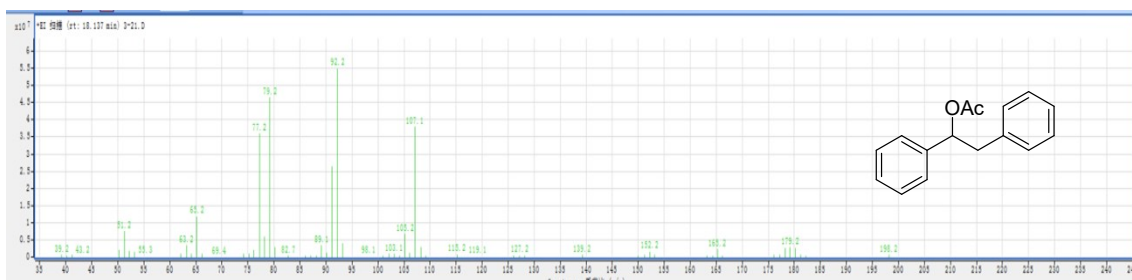

**Figure S110. GC-MS of 1,2-diphenylethyl acetate from 1,2-diphenylethan-1-ol(table 5, entry 21).**

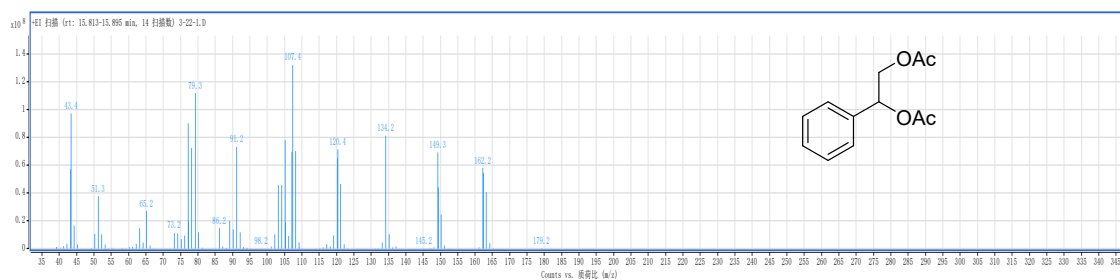

**Figure S111. GC-MS of 1-phenylethane-1,2-diyl diacetate from 1-phenylethane-1,2-diol(table 5, entry 22-1).**

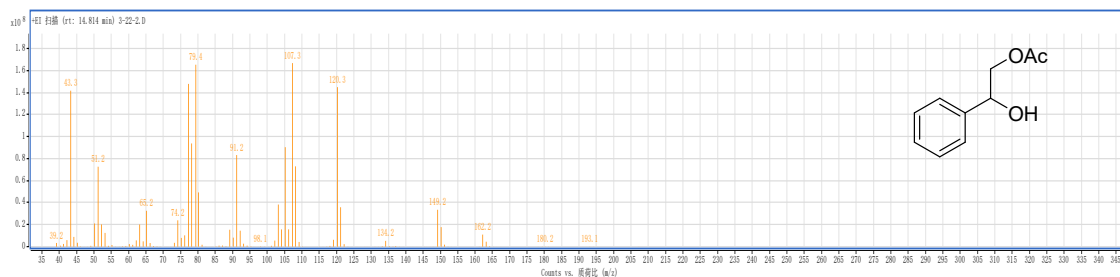

**Figure S112. GC-MS of 2-hydroxy-2-phenylethyl acetate from 1-phenylethane-1,2-diol(table 5, entry 22-2).**

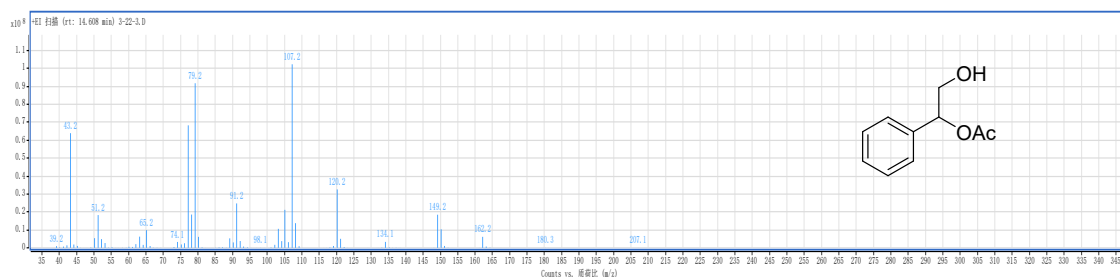

**Figure S113. GC-MS of 2-hydroxy-1-phenylethyl acetate from 1-phenylethane-1,2-diol(table 5, entry 22-3).**

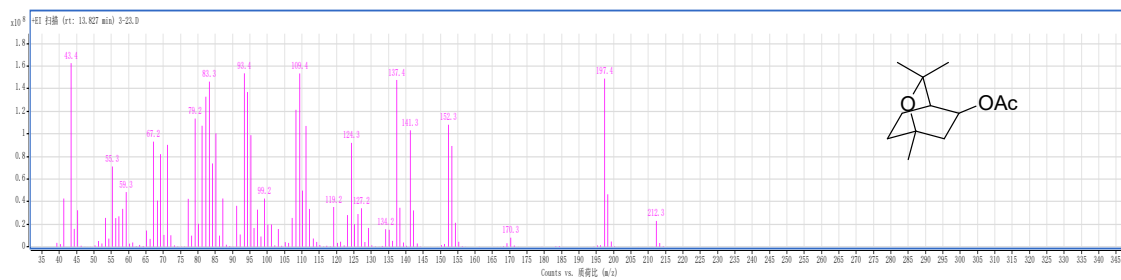

**Figure S114. GC-MS of (±)-exo-1,3,3-Trimethyl-2-oxabicyclo[2.2.2]octane-5-yl acetate from (±)-exo-1,3,3-Trimethyl-2-oxabicyclo[2.2.2]octane-5-ol(table 5, entry 23).**
